# Supplementary material
Source: PubMed Central journal article supplement (PMC3479620)
Supplement: 1212955109_sapp.pdf [file 1212955109_sapp.pdf]

## Supplementary Information Appendix:

# Features of the *Arabidopsis* recombination landscape resulting from the combined loss of sequence variation and DNA methylation

Maria Colomé-Tatché<sup>1†</sup>, Sandra Cortijo<sup>2†</sup>, René Wardenaar<sup>1</sup>, Lionel Morgado<sup>1</sup> Benoit Lahouze<sup>2</sup>, Alexis Sarazin<sup>2</sup>, Mathilde Etcheverry<sup>2</sup>, Antoine Martin<sup>2</sup>, Suhua Feng<sup>3</sup>, Evelyne Duvernois-Berthet<sup>2</sup>, Karine Labadie<sup>4</sup>, Patrick Wincker<sup>4</sup>, Steven E. Jacobsen<sup>3</sup>, Ritsert C. Jansen<sup>1</sup>, Vincent Colot<sup>2\*</sup> and Frank Johannes<sup>1\*</sup>

<sup>1</sup>Groningen Bioinformatics Centre, University of Groningen, Nijenborgh 7, 9747 AG Groningen, The Netherlands. <sup>2</sup>Institut de Biologie de l'École Normale Supérieure (IBENS), CNRS UMR8197-INSERM U1024, 46 rue d'Ulm, 75230 Paris cedex 05, France. <sup>3</sup>Howard Hughes Medical Institute, Department of Molecular, Cell, and Developmental Biology, University of California, Los Angeles, CA 90095-1606, USA. <sup>4</sup>Genoscope, Institut de Génétique, CEA, 2 rue Gaston Crémieux, Evry, F-91057, France.

<sup>†</sup>Equal contributions

\*To whom correspondence should be addressed; E-mail: f.johannes@rug.nl, colot@biologie.ens.fr

## Contents

|           |                                                                                |          |
|-----------|--------------------------------------------------------------------------------|----------|
| <b>1</b>  | <b>MeDIP protocol</b>                                                          | <b>3</b> |
| <b>2</b>  | <b>Hidden Markov Model for methylation state classification</b>                | <b>3</b> |
| <b>3</b>  | <b>BS-seq protocol and comparison to MeDIP</b>                                 | <b>4</b> |
| <b>4</b>  | <b>Parental DMRs and epiRILs parent of origin</b>                              | <b>4</b> |
| <b>5</b>  | <b>Mendelian ratios</b>                                                        | <b>5</b> |
| <b>6</b>  | <b>Lander-Green algorithm, inference of parental states and genetic length</b> | <b>5</b> |
| <b>7</b>  | <b>Transcriptome analysis of epiRILs and <i>ddm1</i> seedlings</b>             | <b>7</b> |
| <b>8</b>  | <b>Transgenerational data</b>                                                  | <b>8</b> |
| <b>9</b>  | <b>Consensus map</b>                                                           | <b>9</b> |
| <b>10</b> | <b>Recombination intensities at major annotation transitions</b>               | <b>9</b> |

## 1 MeDIP protocol

The original 123 epiRILs were chosen using a selective (epi)genotyping strategy based on two uncorrelated complex traits, flowering time and root length. Phenotypically informative lines from both tails of the trait distributions were selected for DNA methylation profiling and whole genome resequencing. Extensive simulation studies indicated that local and global recombination distortion effects are negligible as a result of this selection procedure, particularly for QTL effect sizes that are consistent with the heritability estimates obtained for these traits.

MeDIP-chip was carried out as previously described [1]. Briefly, DNA was extracted using the Qiagen MaxiPrep kit and sonicated using a Diagenode Bioruptor. Sonicated DNA (1.5 $\mu$ g) was denatured at 95°C for 10 minutes in 600 $\mu$ l of buffer 1 (10 mM Tris HCl pH 7.5, 500 mM NaCl, 1 mM EDTA). Immunoprecipitation was performed by adding 5 $\mu$ g of anti-5mC monoclonal antibody (Diagenode, cat n° MAb-006-500) to the DNA solution and by incubating the resulting mix overnight at 4°C with gentle agitation. Forty  $\mu$ l of washed M280 Dynabeads (Invitrogen) were then added and the suspension was incubated at 4°C for 4 hr with gentle agitation. The supernatant was then discarded, 300 $\mu$ l of buffer 1 were added to the IP pellet and the suspension was incubated 10 min at room temperature with gentle agitation. Three more washes were carried out at room temperature, using 600 $\mu$ l of buffer 1. The IP fraction was eluted by incubating it 1 hour at 42°C with 300 $\mu$ l of buffer 2 (30mM Tris HCl pH: 8.0) and 7 $\mu$ l of Proteinase K (NEB, 20 $\mu$ g/ $\mu$ l). DNA from the IP fraction was recovered by phenol-chloroform extraction and ethanol precipitation. IP and INPUT (150ng) DNA were amplified using the Sigma GenomePlex Complete Whole Genome Amplification (WGA) Kit following the manufacturer’s instructions. Cy3 and Cy5 labeling was performed using the Nimblegen Dual color DNA labeling kit (Roche NimbleGen) and co-hybridizations in dye-swap were performed using a custom design NimbleGen 3x720K array, as previously described [2].

## 2 Hidden Markov Model for methylation state classification

We analyze the  $\ln(IP/INPUT)$  signal using a Hidden Markov Model (HMM), as described in detail elsewhere [1]. Briefly, we view the signal as a mixture of three underlying components: the unmethylated component (U) for low signal, the intermediately methylated component (I) for middle intensity signal, and the methylated component (M) for high signal. The HMM relies on the following properties of the MeDIP-chip data: i) the probe signals are noisy proxies of an unobserved (hidden) methylated, intermediate or unmethylated state, and ii) the probe signals are spatially correlated along the genome so that neighboring probes provide similar information.

We use the  $\ln(IP/INPUT)$  signal distribution of probes corresponding to introns as emission probability for the U component, in order to incorporate the biological knowledge of introns being mostly unmethylated into the estimation procedure. We approximate this distribution to an arbitrary degree using a mixture of 30 normal distributions using the EM algorithm [3]. The signal distribution for intronic sequences is not noticeably affected in *ddm1*, as expected. As emission probability for the M component we consider a normal distribution with a fixed mean at the 99<sup>th</sup> percentile of the intron distribution and unknown variance. Finally, as emission probability for the I component we also consider a normal distribution with mean fixed at the mid-point between the other two means, and variance equal to the one of the M emission probability. For the analysis of the *ddm1* parent, we use instead the M and I emission probabilities of the wt-parent.

We implement the Baum-Welch algorithm [4, 5] using the above distributional constraints to find the estimates for the variances, the probe-to-probe transition probabilities, and the initial probabilities. Once these parameters are estimated we proceed to calculate the most likely chain of hidden states (U, I or M). We calculate the individually most likely single hidden probe state at each position, given the observed probe signals and the parameters of the HMM. The result of this procedure is the methylome.

### 3 BS-seq protocol and comparison to MeDIP

Whole genome bisulfite sequencing was carried out as previously described [6], using Illumina sequencing and read lengths of 76nt or 100nt. Reads were mapped using BS Seeker [7]. Average genome coverage was 29X for the 6 epiRILs. Conversion rates were well over 99% in each case (mean conversion rate = 99.28%), based on data obtained for unmethylated chloroplast DNA.

After the production of files with read sequences (fastq files) the read sequences were subjected to several rounds of treatment before alignment to the genome. Parts of the adapter sequence were for example also sequenced when the read length was longer than the molecule that was sequenced. These parts were removed in the first step. The adapter part was found by sliding the adapter sequence over the read sequence starting from the end of the read sequence. We allowed one mismatch for every five bases (sequencing errors). The minimum overlap was set to four bases and the last three bases were removed when the adapter sequence was not found. In the second step we removed read sequences with more than one copy (we kept one copy). These copies were likely produced during the PCR step and were thus deemed not informative. At the end before mapping we also removed read sequences that were shorter than 30bp. The reads were after these treatments aligned to the genome using BS Seeker [7]. Only reads which could be assigned to a single locus with a maximum of three mismatches were used to quantify the methylation status of individual cytosines (settings: -t N -e 73 or 98 -m 3).

In order to make the BS-seq data comparable to the MeDIP-chip data we calculated so called “BS probe signals”. These were calculated by dividing the number of methylated cytosine calls by the total number of cytosine calls in each of the windows for which the probes were designed (window length: 165 bp; signal range: 0 – 1). By cytosine calls we mean the individual cytosine call of each read sequence.

For the comparison with the MeDIP data (comparison with HMM classification) we only selected probe windows with 35 or more cytosines, and probes with a conservation score of 95 or less. Also at least half of the cytosines should be covered by one or more reads. We applied these criteria in order to exclude misbehaving probes.

The conservation score of a probe indicates the uniqueness of the probe sequence. These scores were obtained by performing a blast search. Scores are percentage of identity with the second best hit (score range: 45 – 100). The best hit is with the genomic location for which the probe was designed. Probes with a high conservation score are more likely to misbehave.

Figure S1 (SI Appendix) shows the distribution of BS probe signals for the different HMM classifications. This figure shows that both the MeDIP protocol and the analysis method performed well.

For a direct comparison of the HMM classification we needed to classify the BS probe signals into unmethylated, intermediate and methylated. The BS probe signals were classified by applying different sets of signal cutoffs, one cutoff for the transition from U to I and one for transition I to M. The most optimal combination of cutoffs will give the highest percentage of overlapping probe classifications. Table S1 (SI Appendix) shows the total percentage of overlapping probe classifications, and the percentages for each methylation class separately, for the most optimal cutoffs (% of HMM classification with overlap classification BS probes). This table shows that the overlap with the unmethylated and fully methylated classification is substantial (~ 97% and ~ 81%) but that there is a smaller overlap with the intermediate class (~ 16%). For the DMR analysis however, we only focus on probes that make a complete switch from methylated in wt to unmethylated in *ddm1*. For that reason the miscalls in the intermediate class are less relevant.

### 4 Parental DMRs and epiRILs parent of origin

We conduct a probe-level comparison of the inferred methylation states between the wt and the *ddm1* parent. Probes are classified as non-polymorphic if the methylation state is the same between parents, or as polymorphic if the methylation state between parents is different. We collapse into regions the clusters of consecutive probes (minimum of three) which are extreme polymorphisms (M-U) between

the parents. There are 2611 of these regions, which we call parental DMRs. They are all hypomethylated in the *ddm1* parent (M in wt, U in *ddm1*), which is expected from the *ddm1*-induced loss of methylation reported previously [8].

For each epiRIL  $j$  we consider the collection of probes corresponding to a parental DMR  $i$  and calculate the average posterior probability from the HMM (Section 2) over these probes for the U, I and M states ( $\bar{p}_{ij}(M)$ ,  $\bar{p}_{ij}(I)$ ,  $\bar{p}_{ij}(U)$ ). A region of the epiRIL is called wt-like or *ddm1*-like if the state that maximizes  $\bar{p}_{ij}$  is  $M$  or  $U$ , respectively. In the case where  $I$  maximizes  $\bar{p}_{ij}$  we do not assign a parent of origin. Using the above, we define the measurement error associated with the parent of origin call for each DMR  $i$  and epiRIL  $j$  as

$$\epsilon_{ij} = 1 - \max(\bar{p}_{ij}). \quad (1)$$

## 5 Mendelian ratios

Under the assumption that DMRs were stable for eight generations of breeding, both wt- and *ddm1*-like parental states should appear according to Mendelian segregation ratios in the epiRILs. The sampling variation around these ratios was calculated from a binomial distribution taking into account the sample size ( $N = 123$ ), the cross design (backcross) and the 8%  $F_2$  contamination previously reported [9]. This yields a confidence interval for the wt mendelian ratios of (62.7%, 83.3%) and for the *ddm1* Mendelian ratios of (16.7%, 37.3%).

We determine at each parental DMR the percentage of epiRILs from wt origin ( $\%wt$ ), the percentage of epiRILs from *ddm1* origin ( $\%ddm1$ ) and the percentage of epiRILs with intermediate methylation ( $\%I$ ). Of course, for each DMR,  $\%wt + \%ddm1 + \%I = 100\%$ . We select a region as being stably inherited if the percentage of wt-like epiRILs, *ddm1*-like epiRILs and intermediate epiRILs fulfill all the following inequalities:

- $\%wt + \%I > 62.7\%$
- $\%wt < 83.3\%$
- $\%I < \%wt$
- $\%I < \%ddm1$

In this way, we select the DMRs with a low percentage of intermediate epiRILs (smaller proportion than any of the other two categories) and for which the amount of wt-like epiRILs combined with any amount of intermediate epiRILs fulfills the Mendelian criterion of inheritance. Using this definition, we find 871 regions segregating in a Mendelian fashion.

## 6 Lander-Green algorithm, inference of parental states and genetic length

These selected regions mentioned above are viewed as markers in a genetic map, and their observed marker states (e.g. wt or *ddm1*-like) are analogously defined as epigenotypes. Since the genomic positions of all markers are known, we need only calculate the map distance between markers, taking into account all sources of error in the parental calls. To achieve this, we develop a generalized version of the Lander-Green algorithm [10] which considers individual and marker dependent epigenotype errors. In this HMM-based algorithm the observations are the parental calls of the markers (i.e. wt-like, *ddm1*-like or I), and the hidden states are the real (unobserved) parental origins (wt-like or *ddm1*-like).

We define the probability  $\Pr(c_j^i|h_j^i) = q_j^i(c_j^i, h_j^i)$  that the epigenotype  $c_j^i$  ( $c_j^i = \{wt - \text{like}, ddm1 - \text{like}, I\}$ ) is observed at marker  $j$  in epiRIL  $i$ , given that the true epigenotype is  $h_j^i$  at that marker ( $h_j^i = \{wt - \text{like}, ddm1 - \text{like}\}$ ). The set of probabilities  $q$  is called emission probabilities. We relate these emission probabilities to the measurement error  $\epsilon_{ij}$  (Eq. 1) and to some amount of stochastic epigenetic changes,  $s$ , that could have occurred during inbreeding. These two sources of error thus quantify the quality of the parent of origin call at each DMR:

$$q_j^i(c_j^i, h_j^i) = \begin{cases} 1 - \epsilon_{ij} + s, & \text{if } c_j^i = h_j^i, \\ \epsilon_{ij} + s, & \text{if } c_j^i \neq h_j^i. \end{cases} \quad (2)$$

The variable  $q$  is a matrix of real numbers with dimension  $(2 \times M)$ , where  $M$  is the number of markers for each epiRIL.

We also define the probability that the true epigenotype at a marker  $j$  in epiRIL  $i$  is  $h_j^i$  ( $h_j^i = \{wt - \text{like}, ddm1 - \text{like}\}$ ) given that the observed epigenotype at that marker is  $c_j^i$  ( $c_j^i = \{wt - \text{like}, ddm1 - \text{like}, I\}$ ). This probability can be calculated from  $q_j^i$  using the Bayes theorem:

$$p_j^i(h_j^i, c_j^i) = \Pr(h_j^i|c_j^i) = \frac{\Pr(c_j^i|h_j^i) \Pr(h_j^i)}{\Pr(c_j^i)},$$

where  $\Pr(c_j^i|h_j^i) = q_j^i(c_j^i, h_j^i)$ ,  $\Pr(c_j^i) = \sum_{y=\{wt, ddm1\}\text{-like}} \Pr(c_j^i|h_j^i = y)$ , and the initial probabilities  $\Pr(h_j^i) = cte$  are given by the Mendelian ratios. The variable  $p$  is a matrix of real numbers with dimension  $(2 \times M)$  for each epiRIL.

Denote by  $R_j$  the probability of a recombinant type between locus  $j$  and  $j + 1$ . Therefore the transition probabilities between two loci are

$$\Pr(h_{j+1}^i = y|h_j^i = z) = \begin{cases} 1 - R_j, & \text{if } y = z, \\ R_j, & \text{if } y \neq z, \end{cases}$$

where  $y = z = \{wt\text{-like}, ddm1\text{-like}\}$ . The matrix of transition probabilities is:

$$T_{j,j+1} = \begin{pmatrix} t_{j,j+1}^{wt\text{-like}, wt\text{-like}} & t_{j,j+1}^{wt\text{-like}, ddm1\text{-like}} \\ t_{j,j+1}^{ddm1\text{-like}, wt\text{-like}} & t_{j,j+1}^{ddm1\text{-like}, ddm1\text{-like}} \end{pmatrix} = \begin{pmatrix} 1 - R_j & R_j \\ R_j & 1 - R_j \end{pmatrix}.$$

For each epiRIL  $i$ , we calculate the forward variable  $\alpha_j^i(h)$  as

$$\alpha_1^i(h) = p_1^i(h, c_1^i),$$

$$\alpha_{j+1}^i(h) = \left[ \sum_{z=\{wt, ddm1\}\text{-like}} \alpha_j^i(z) t_{j,j+1}^{z,h} \right] q_{j+1}^i(c_{j+1}^i, h),$$

where  $h = \{wt\text{-like}, ddm1\text{-like}\}$  and  $1 \leq j \leq M_C - 1$ , where  $M_C$  is the number of markers per chromosome. We also define the backward variable  $\beta_j^i(h)$  as:

$$\beta_{M_C}^i(h) = 1,$$

$$\beta_{j-1}^i(h) = \sum_{z=\{wt, ddm1\}\text{-like}} t_{j-1,j}^{h,z} q_j^i(c_j^i, z) \beta_j^i(z),$$

where  $h = \{wt\text{-like}, ddm1\text{-like}\}$  and  $M_C \geq j \geq 2$ .

$R_j$  is estimated iteratively using:

$$R_j = \frac{1}{N} \sum_{i=1}^N \frac{\left( \alpha_j^i(y), \alpha_j^i(z) \right) \cdot T_{j,j+1}^* \cdot \left( \beta_{j+1}^i(y) q_{j+1}^i(c_{j+1}^i, y), \beta_{j+1}^i(z) q_{j+1}^i(c_{j+1}^i, z) \right)^{tr}}{\left( \alpha_j^i(y), \alpha_j^i(z) \right) \cdot T_{j,j+1} \cdot \left( \beta_{j+1}^i(y) q_{j+1}^i(c_{j+1}^i, y), \beta_{j+1}^i(z) q_{j+1}^i(c_{j+1}^i, z) \right)^{tr}},$$

where  $1 \leq j \leq M_C - 1$ ,  $y = z = \{\text{wt-like}, \text{ddm1-like}\}$ , and  $T_{j,j+1}^* = ((0, R_j), (R_j, 0))$  is a  $2 \times 2$  matrix. The amount of stochastic changes,  $s$ , is fixed at some value.

We use the final estimates  $\hat{R}_j$  (for  $j = 1, \dots, M$ ) to calculate the likelihood of the data as

$$\log(L(\hat{R})) = \sum_{i=1}^N \sum_{j=1}^M \log \left( \left( \alpha_j^i(y), \alpha_j^i(z) \right) \cdot T_{j,j+1} \cdot \left( \beta_{j+1}(y), \beta_{j+1}(z) \right)^{tr} \right), \quad (3)$$

where again  $y = z = \{\text{wt-like}, \text{ddm1-like}\}$ , and  $N$  is the total number of epiRILs. The whole procedure is repeated for a series of fixed values for  $s$  and the value that maximizes the profile likelihood is taken as an estimate for the biological rate of stochasticity.

Finally, we infer parental haplotypes along the genome by selecting at each DMR the parental call that maximizes the probability of the observations given the model:

$$w_j^i = \operatorname{argmax}(\Pr(h_j^i | c_j^i, \text{model})), \quad (4)$$

where  $\operatorname{argmax}$  stands for the argument of the maximum. We refer to this latter inference as the epigenotype reconstruction step.

The epigenotype reconstruction step assigns unlikely epigenotypes (e.g. DMRs with initial intermediate methylation calls or DMRs with high measurement error) to the most likely wt-like or *ddm1*-like epigenotype. This process can change the Mendelian segregation ratios. We therefore reevaluate Mendelian inheritance at each DMR, such that the wt-like epigenotype percentage falls within ( $\%wt < 83.3\%$ ) and ( $\%wt > 62.7\%$ ). From the initial 871 markers, after epigenotype reconstruction 867 are selected according to this criterion. We find that among these 867 markers, only 262 map to unique genetic locations (i.e. they are more than 0.0001 cM apart from each other), the rest being genetically redundant and uninformative. We remove these redundant markers and iterate through the following steps: i) Remove markers at the same map position (distance  $< 0.0001$ cM). ii) Recalculate  $R_j$  using the Lander-Green algorithm (with constant epigenotyping error). iii) Obtain the most likely haplotype map. After 5 iterations the procedure converges to a robust map containing 184 markers. Finally, we remove problematic markers showing strong correlations across chromosomes. This final cleaning step is performed in R/qtl [11] and follows closely the relevant section on map cleaning described in Broman [12]. Our final map contains 126 robust markers.

Finally, we convert the recombination at fixation  $R$  for the epiRIL to the value of  $r$  at meiosis. We can use the result at fixation (because generation = 8 here) [13]:

$$r = \frac{2R}{3 - 4R}. \quad (5)$$

This estimator is biased [14], the modified estimator for  $r$  is given by

$$r = \frac{2R}{N(3 - 4R)^3} (9N - 24NR + 16R^2N - 12R + 12), \quad (6)$$

where  $N = 123$  is the number of lines. This new estimator has a bias which is proportional to  $1/N^2$ .

## 7 Transcriptome analysis of epiRILs and *ddm1* seedlings

Whole-genome expression profiling was performed using tiling microarrays on 10 day-old seedlings grown in liquid 1/2MS media, 16 hours of light at 22°C and 8 hours of night at 19°C. Total RNA was extracted using Rneasy Plant Minikit (Qiagen) according to the supplier's instructions. One  $\mu\text{g}$  of total RNA was amplified with one round of in vitro transcription 10h at 37°C using the MessageAmp II aRNA Amplification Kit (Ambion). Double stranded cDNA synthesis was then performed on 2  $\mu\text{g}$  of aRNA using the SuperScript Double-Stranded cDNA Synthesis Kit (Invitrogen). Cy3 and Cy5 labeling was

performed using the Nimblegen Dual color DNA labeling kit (Roche NimbleGen) according to manufacturer's instructions. Co-hybridization in dye-swap experiment was performed using the NimbleGen 3x720K array design and following manufacturer's instructions. Data acquisition was performed according to Roche Nimblegen instructions. Hybridization data was normalized using an ANOVA model, and data were averaged on the dye-swap to remove tile-specific dye biases.

## 8 Transgenerational data

In order to observe further evidence of the stable inheritance of methylation states, we performed measurements of the methylome of one epiRIL (line 344) for seven generations following the backcross. At each generation, the DNA of five siblings was pooled together to perform a MeDIP chip analysis, as described in Section 1. The data was normalized as described in [1].

For each of the 126 stable markers, we calculate the mean signal of all probes corresponding to that marker at every generation. We classified the markers in two different categories: wt-inherited or *ddm1*-inherited, based on the genetic map information at the last generation (Section 6).

In order to obtain a theoretical model to describe the expected behavior of the signal over generation time we calculate the expected proportions of wt/wt epigenotype, *ddm1/ddm1* epigenotype and wt/*ddm1* epigenotype at every generation of inbreeding following the backcross. For the wt-inherited markers, we implemented a Markov Chain with selection against the *ddm1* homozygotes at every generation. For the markers inherited from the *ddm1* parent, we implemented a Markov Chain with selection against wt/wt epigenotypes. We obtained the following results for the proportions of each of the three epigenotypes at any generation  $t$ :

$$\begin{aligned} p_{ddm1}(t) &= \left\{ \frac{1}{2^t + 2}, \frac{2}{2^t + 2}, 1 - \frac{3}{2^t + 2} \right\}; \\ p_{wt}(t) &= \left\{ 1 - \frac{3}{3 \times 2^t + 2}, \frac{2}{3 \times 2^t + 2}, \frac{1}{3 \times 2^t + 2} \right\}, \end{aligned} \quad (7)$$

where  $p_{ddm1} = \{\Pr(wt/wt), \Pr(wt/ddm1), \Pr(ddm1/ddm1)\}$  are the proportions of wt/wt, wt/*ddm1* and *ddm1/ddm1* epigenotypes at every generation  $t$  for the probes getting fixed in a *ddm1* haplotype at generation S7, and  $p_{wt} = \{\Pr(wt/wt), \Pr(wt/ddm1), \Pr(ddm1/ddm1)\}$  are the proportions of wt/wt, wt/*ddm1*, and *ddm1/ddm1* epigenotypes at every generation  $t$  for the probes getting fixed in a wt haplotype at generation S7.

Since five plants were used at each generation to provide the DNA material for the MeDIP protocol, we needed to approximate the signal at each generation by a weighted sum over the three different epigenotypes multiplied by the mean of their signal at each generation:

$$\begin{aligned} s_{ddm1}(t) &= p_{ddm1}^{(1)}(t) * \mu_{wt/wt}(t) + p_{ddm1}^{(2)}(t) * \mu_{wt/ddm1}(t) \\ &\quad + p_{ddm1}^{(3)}(t) * \mu_{ddm1/ddm1}(t); \\ s_{wt}(t) &= p_{wt}^{(1)}(t) * \mu_{wt/wt}(t) + p_{wt}^{(2)}(t) * \mu_{wt/ddm1}(t) + p_{wt}^{(3)}(t) * \mu_{ddm1/ddm1}(t), \end{aligned} \quad (8)$$

where  $p^{(i)}$  is the component  $i$  of vector  $p$ . At every generation  $t$  we use as mean value for the signal of the *ddm1/ddm1* epigenotype ( $\mu_{ddm1/ddm1}(t)$ ) the  $\ln(IP/INPUT)$  signal distribution of probes corresponding to introns, and we calculate its mean by approximating this distribution to an arbitrary degree using a mixture of 30 normal distributions using the EM algorithm [3]. For the signal of the wt/wt epigenotype ( $\mu_{wt/wt}(t)$ ), we consider the 99<sup>th</sup> percentile of the intron distribution at every generation  $t$ , and for the signal of the wt/*ddm1* epigenotype ( $\mu_{wt/ddm1}(t)$ ) we consider the middle point between  $\mu_{ddm1/ddm1}(t)$  and  $\mu_{wt/wt}(t)$ . We can associate the methylated component with the epigenotype wt/wt and the unmethylated component with the epigenotype *ddm1/ddm1* because all the parental DMRs are methylated in the wt parent and unmethylated in the *ddm1* one.



## 9 Consensus map

We evaluated the inferred epiRILs map by comparing it to genetic maps of classical *Arabidopsis* experimental crosses. To this end, we re-analyzed 17 recently published F<sub>2</sub> populations that were derived from pairs of 18 different *Arabidopsis* natural accessions [15]. In total, 7045 plants had been genotyped (an average of 410 plants per cross, range=(235 – 462)) at an average of 235 genome positions (range=(215 – 257)) [15].

In order to perform a meaningful comparison of the genetic and epigenetic maps, we needed them to have similar coverage. We selected a subset of markers for each cross such that the number of markers and the bp position of those markers is the same across maps.

In particular, we chose a reference genome with markers at the position of the epigenetic markers. For each reference marker, we selected from the 17 natural accessions crosses the marker which is closest to it. For these selected markers we used the R-qtl package [11] implemented in R (<http://www.r-project.org>) to re-estimate the genetic map (function *est.map* using `map.function=haldane`). In the cases where there was no marker close enough to the reference position, we artificially added a marker at the reference position and we used R-qtl to re-estimate the map (function *est.map* using `map.function=haldane`) and to simulate the most likely genotype at that position (function *fill.geno* with `method=argmax`).

In Fig. S11 (SI Appendix) we can see the representation of the consensus map in base pair positions. The mean distance from the consensus map markers is 0.17Mb and the furthest marker is at 1.39Mb from the reference marker. The main map characteristics are not affected by the use of this common map, as can be seen in Fig. S12 (SI Appendix). At the same time, the difference in recombination intensity between the accession crosses and the epiRIL at each reference marker interval ( $(\frac{cM}{Mb})_{acc\ cross} - (\frac{cM}{Mb})_{epiRIL}$ ) is not correlated with the difference in the size of the marker interval ( $\Delta Mb_{acc\ cross} - \Delta Mb_{reference}$ ), which is due to the slight mismatch of the marker positions between the reference map (i.e. the epiRIL marker positions) and the position of the accessions markers (Fig. S13 (SI Appendix)). This allows us to do a meaningful comparison of the features of the maps for each cross.

## 10 Recombination intensities at major annotation transitions

Figure 2A and C show how the recombination intensity increases rapidly at the pericentromeric boundaries, which also coincide with major transitions in genome content from genes to transposons. In order to find the area where the recombination intensity is maximal we implemented a sliding window approach (window size: 3 Mb, step size: 100 kb). We used the transition in genome content as a reference point. The recombination intensity of each window was calculated by dividing the percentage of recombination events within each window (% of all recombination events) by the percentage of bp covered by the same overlapping marker intervals (% of all marker intervals). This calculation was done across all sliding windows. Marker intervals with a small overlap with the window were excluded when the non-overlapping part was bigger than 1 Mb. The maximum recombination intensity of the F<sub>2</sub> populations was found at a distance of +100 kb (middle position window; in the direction of the arms; Fig. S15 (SI Appendix)).

The windows with the maximum recombination intensity (located +100 kb from the transition towards the arms) were further examined for the presence of shared breakpoints. In an effort to fine-map shared breakpoints within these windows, we resorted to probe-level tiling array data of specific epiRILs that were recombinant in these windows. For this analysis we only considered differentially methylated probes (M in wt and U in *ddm1*) that showed Mendelian segregation patterns in the epiRILs. To avoid misclassified probes due to cross-hybridization issues we also considered probes with a conservation score of 85 or less (high quality probes). We selected differentially methylated probes as being stably inherited if the percentage of wt-like epiRILs (%*wt*), *ddm1*-like epiRILs (%*ddm1*) and intermediate epiRILs (%*I*) fulfill all the following inequalities:

- %*wt* > 62.7
- %*wt* < 83.3

- $\%ddm1 > \%I$

Shared breakpoints were fine-mapped by visual inspection of the probe classification (probes that fulfill the above criteria) of the recombinant epiRILs. For this purpose we only plotted probes that were M (green; wt-like) or U (red; *ddm1*-like). We considered a breakpoint as being shared if at least three epiRILs were having an overlapping breakpoint interval. The shared breakpoint interval length was calculated by taking the difference of the minimum start position and the maximum stop position of all intervals. Using the above criteria we found 12 shared breakpoints (Table S10 (SI Appendix)).

## References

- [1] Cortijo S, Wardenaar R, Colomé-Tatché M, Johannes F, Colot V (2012) Genome-wide analysis of dna methylation in arabidopsis using medip-chip. *Methods in Molecular Biology* (in press).
- [2] Roudier F, Ahmed I, Bérard C, Sarazin A, Mary-Huard T, et al. (2011) Integrative epigenomic mapping defines four main chromatin states in arabidopsis. *EMBO Journal* 30: 1928–1938.
- [3] McLachlan G, Peel D (2000) *Finite Mixture Models*. John Wiley and Sons, Inc.
- [4] Baum L, Petrie T, Soules G, , Weiss N (1970) A maximization technique occurring in the statistical analysis of probabilistic functions of markov chains. *Ann Math Stat* 41: 164–171.
- [5] Rabiner L (1989) A tutorial on hidden markov models and selected applications in speech recognition. *Proceedings of the IEEE* 77: 257–286.
- [6] Cokus S, Feng S, Zhang X, Chen Z, Merriman B, et al. (2010) Shotgun bisulphite sequencing of the arabidopsis genome reveals dna methylation patterning. *Nature* 452: 215–219.
- [7] Chen P, Cokus S, Pellegrini M (2010) Bs seeker: precise mapping for bisulfite sequencing. *BMC Bioinformatics* 11:203, doi 10.1186/1471-2105-11-203.
- [8] Vongs A, Kakutani T, Martienssen R, Richards E (1993) *Arabidopsis thaliana* dna methylation mutants. *Science* 260: 1926-1928.
- [9] Johannes F, Porcher E, Teixeira F, Saliba-Colombani V, Simon M, et al. (2009) Assessing the impact of transgenerational epigenetic variation on complex traits. *PLoS Genetics* 5: e1000530.
- [10] Lander E, Green P (1987) Construction of multilocus genetic linkage maps in humans. *Proceedings of the National Academy of Sciences* 84: 2363–2367.
- [11] Broman K, Wu H, Sen S, Churchill G (2003) R/qtl: Qtl mapping in experimental crosses. *Bioinformatics* 19: 889–890.
- [12] Broman K (2010) Genetic map construction with r/qtl. Technical report 214.
- [13] Johannes F, Colomé-Tatché M (2011) Quantitative epigenetics through epigenomic perturbation of isogenic lines. *Genetics* 188: 215-227.
- [14] Martin O, Hospital F (2006) Two- and three-locus tests for linkage analysis using recombinant inbred lines. *Genetics* 173: 451–459.
- [15] Salomé P, Bomblies K, Fitz J, Laitinen RAE, Warthmann N, et al. (2011) The recombination landscape in arabidopsis thaliana f2 populations. *Heredity* 108: 447-455.

## Supplementary Information Appendix (Figures and Tables):

# Features of the *Arabidopsis* recombination landscape resulting from the combined loss of sequence variation and DNA methylation

Maria Colomé-Tatché<sup>1†</sup>, Sandra Cortijo<sup>2†</sup>, René Wardenaar<sup>1</sup>, Lionel Morgado<sup>1</sup>, Benoit Lahouze<sup>2</sup>, Alexis Sarazin<sup>2</sup>, Mathilde Etcheverry<sup>2</sup>, Antoine Martin<sup>2</sup>, Suhua Feng<sup>3</sup>, Evelyne Duvernois-Berthet<sup>2</sup>, Karine Labadie<sup>4</sup>, Patrick Wincker<sup>4</sup>, Steven E. Jacobsen<sup>3</sup>, Ritsert C. Jansen<sup>1</sup>, Vincent Colot<sup>2\*</sup> and Frank Johannes<sup>1\*</sup>

<sup>1</sup>Groningen Bioinformatics Centre, University of Groningen, Nijenborgh 7, 9747 AG Groningen, The Netherlands. <sup>2</sup>Institut de Biologie de l'École Normale Supérieure (IBENS), CNRS UMR8197-INSERM U1024, 46 rue d'Ulm, 75230 Paris cedex 05, France. <sup>3</sup>Howard Hughes Medical Institute, Department of Molecular, Cell, and Developmental Biology, University of California, Los Angeles, CA 90095-1606, USA. <sup>4</sup>Genoscope, Institut de Génétique, CEA, 2 rue Gaston Crémieux, Evry, F-91057, France.

<sup>†</sup>Equal contributions

\*To whom correspondence should be addressed; E-mail: f.johannes@rug.nl, colot@biologie.ens.fr

## Supplemental figure legends

**Figure S1: Comparison BS-seq and MeDIP-chip (HMM classification):** The distribution of the BS probe signals for the three methylation categories of the HMM classification. White, gray and dark gray box: unmethylated, intermediate and methylated probes respectively. Numbers at the top of the figure are line numbers of the epiRILs that were sequenced.

**Figure S2: Segregation ratios:** Segregation ratios for the 867 Mendelian DMRs (left) and the 126 Mendelian DMRs used for map construction. The green and red horizontal bars indicate the expected Mendelian ratios (73% for the wt inheritance and 27% for the *ddm1* inheritance), and the green and red areas show the  $\pm 99\%$  CI (62.7% - 83.3% for the wt, and 16.7% - 37.3% for the *ddm1*). At the position of each DMR (x-axes) the green cross represents the percentage of wt inherited epiRILs and the red dot represents the percentage of *ddm1* inherited epiRILs.

**Figure S3: Small RNA abundance:** Hit-normalized density (reads per kb per 1 million reads) of 24nt small RNA (sRNA) corresponding to stable and reversible DMRs in the wt and *ddm1* parental lines. Isolation was performed as described in Pfeffer et al. (Curr. Protoc. Mol. Biol 2005). Wt and *ddm1* sRNA libraries were prepared and sequenced by Fasteis (Switzerland) using Illumina Hi-Seq 2000 technology and 200  $\mu$ g of total RNA extracted from whole seedlings. Sequence reads were matched against the *Arabidopsis thaliana* genome (TAIR8) using MUMmer v3.0 software (Kurtz et al., Genome Biol. 2004). Only sRNA reads with perfect match over their entire length (15-30nt) were analyzed further (79402397 and 63798837 reads for wt and *ddm1*, respectively). The number of 24-nt reads matching the DMRs is expressed as a normalized density, as describe in Teixeira et. al. (Science 2009). A full description of the sRNA sequence data will be presented elsewhere.

**Figure S4: Sequence annotation of DMRs and markers:** Percentage of DMRs or markers that contain (parts of) genes, transposable elements (TE) or intergenic regions for the categories: Non-Mendelian DMRs (A), Mendelian DMRs (B) and Markers (C).

**Figure S5: CGH analysis:** A comparison of the  $\log_2$  input signals of all wt (WT.R1, WT.R2 and WT.R3) and *ddm1* (DDM1.R1 and DDM1.R2) replicates used for the detection of DMRs. For each gene, transposable element and non-Mendelian DMR (S5-1), Mendelian DMR (S5-2) or marker (S5-3) the average input signal was calculated. The signal distributions were quantile normalization. Transposable element signals and gene signals are indicated with dark gray and gray respectively. DMRs or markers are indicated with red. Numbers in the figure correspond to correlation coefficients of transposable elements (dark gray), genes (gray) and DMRs or markers (red).

**Figure S6: Recombination fractions:** Recombination fractions for each pair of markers along the genome. Red corresponds to small recombination fractions, blue corresponds to a large recombination fractions. This image was generated using the R-qt1 package implemented in R.

**Figure S7: Methylation levels of inherited non-recombinant pericentromeric regions:** Percentage of unmethylated probes for the epiRILs with a non-recombinant pericentromere. Red: *ddm1*-inherited pericentromere; green: wt-inherited pericentromere.

**Figure S8: Transcriptome analysis:** Shown is the expression difference between wild type and epiRIL 98, epiRIL 202 and *ddm1* across the genome for probes that are hypo methylated between the parents (M in wt and U in *ddm1*). The top part of the figure shows the location of the centromere (the dot), the pericentromere (dark grey surrounding the centromere) and the chromosomal arms (gray). The part that is not covered by the genetic map is indicated with light gray. The inference of inherited wt and *ddm1* haplotypes along the genome is indicated with green and red respectively. Results show that expression is higher compared to wt in *ddm1* inherited regions and comparable to wt in wt inherited regions. These observations indicate that the transcriptomal changes induced by *ddm1* are inherited in the epiRILs.

**Figure S9: Correlation between physical length and genetic length:** The physical length of each of the five Arabidopsis chromosomes in Mb and their genetic length in cM are positively correlated. In the inset, the table shows the numerical values for the physical and genetic lengths for each chromosome.

**Figure S10: Use of different map functions:** Map increase between each pair of markers ( $\Delta cM$ ) for the epiRIL recombination map, calculated using different map functions: Morgan's map function (black), Haldane's map function (blue), Kosambi's map function (red) and Carter and Falconer's map function (orange). Changes in map lengths are modest, and do not alter any of the conclusions concerning local recombination changes observed in the epiRILs (see main text).

**Figure S11: Consensus map:** For each chromosome, the markers for the epiRIL (top) and the 17 different accession crosses are represented in light gray circles. The markers selected for the consensus map are represented with solid colored dots, and the light colored vertical lines show the position of the reference marker. If one cross between accessions had no marker closer enough to the reference marker, one extra marker was added (colored cross). The color code is a guide to the eye.

**Figure S12: Change in genetic length:** The genetic length (cM) versus the marker position (Mb) for the 17 accession crosses (top) and the epiRIL (bottom) is shown, both for the consensus map (in red) and the original map for each accession cross and the epiRIL (black). No major deviations from the original map are observed when the consensus map is utilized.

**Figure S13: Correlation between  $\Delta(bp)$  and  $\Delta(cM/Mb)$ :** Correlation plot between the difference in inter-marker length for the epiRIL map compared to the accession crosses map ( $\Delta(bp) = \Delta(bp)_{\text{accession cross}} - \Delta(bp)_{\text{epiRIL}}$ ), and the difference in recombination activity at that marker interval ( $\Delta(cM/Mb) = \Delta(cM/Mb)_{\text{accession cross}} - \Delta(cM/Mb)_{\text{epiRIL}}$ ). The fraction of variance explained by the model is  $R^2 = 0.000274$ .

**Figure S14: Location of historical recombination hotspots:** Shown are the locations of hotspots detected by Horton et al. (Nat. Genet. 2012). Top: gene (gray line) and transposon (black line) density along the chromosomes. Middle: location of the centromere (dot), the pericentromere (dark grey) and the chromosomal arms (light gray). Bottom: location of the hotspots. The hotspot density of all detected hotspots is indicated in gray. This hotspot density is

determined with the use of a sliding window approach (window size: 1 Mb; step size: 200 kb). The blue lines indicate hotspots that were identified in at least eight of the nine regional samples (Horton et al., Nat. Genet. 2012).

**Figure S15: Recombination intensity around major annotation transitions:** Shown is the recombination intensity of 3 Mb windows at different distances from the major annotation transitions. The recombination intensity is calculated across all sliding windows at the same distance from the transitions. The maximum recombination intensity of the F2 populations was found at a distance of + 100 kb (in the direction of the arms).

**Figure S16: Gene density and Recombination rates along pericentromeric regions:** Gene density is shown along the pericentromeric regions of all five chromosomes in successive 105kb windows (red dots; the heterochromatic knob on chr4 is also shown) and for the 67 breakpoint point intervals that have been narrowed down to less than 500 kb (blue crosses). The proportion of COs contributed by each interval to the total number of COs for that chromosome is indicated by vertical purple bars.

**Figure S17: Fine mapping shared recombination breakpoints within AT-zones in the epiRILs:** Shown are three examples of shared recombination breakpoints that map within AT-zones, that is, within 3 Mb of the inflection points between transposon and gene density at pericentromeric boundaries (grey rectangle). For each example, we plot all the tiling array probes that were M in wt and U in *ddm1* and which showed Mendelian segregation patterns in the epiRILs. Shared breakpoints are shown by an arrow and could be fine-mapped within 158 kb, 93 kb and 68 kb on chromosomes 2, 3 and 4 respectively.

**Figure S18: Regression plot of fold change recombination intensity:** A comparison of recombination intensity fold changes (cM/Mb of a given region divided by cM/Mb chromosome average; see Figure 3 in the main text) between AT-zones and chromosome arms. There is a negative relationship between AT-zones and chromosome arms in the epiRILs and (on average) a positive relationship in the F2 populations. This indicates that the recombination suppression in AT-zones is compensated by increased recombination in chromosome arms in the epiRILs, and that this effect is a specific feature of this population.

## Supplemental table legends

**Table S1: Correspondence between HMM and BS-seq:** Overlap between HMM and BS-seq (in %) for all probes, and for probes that are classified as U, I or M by HMM for the epiRILs that were sequenced.

**Table S2: Parental DMRs:** The chromosome and position (start bp and stop bp) for the 2611 parental DMRs are given.

**Table S3: DMRs with Mendelian segregation:** The chromosome and position (start bp and stop bp) are given for the 867 parental DMRs that show Mendelian segregation

**Table S4: Markers:** The chromosome, position (start bp and stop bp) and genetic position (cM) are given for the 126 non-redundant markers.

**Table S5: epiRIL line numbers:** epiRIL numbers in Figure 1B and their corresponding line numbers.

**Table S6: Analysis of transposable elements (TEs) which are located within or overlap with markers:** Column 1 (marker\_id) provides identifiers for the markers used for map construction which overlap with TEs. Column 8 (mobilization) denotes potential mobility of TEs (highlighted in gray) located within or overlapping markers based on bioinformatic analysis (Buisine et al., Genomics 2008). Column 10 (evidence sequencing) provides information about the actual mobility of TEs based on preliminary re-sequencing data. The remaining columns contain information about the ID of the TE (TE\_id), the family (TE\_family), the clade (TE\_clade), the order (TE\_order), the class (TE\_class) and if the TE encodes its own transposase protein (autonomy). See also legend at the bottom of the table.

**Table S7: Consensus map:** For each of the 83 markers of the consensus map, the chromosome and position (bp start and bp stop) corresponding to the epiRIL markers are given, and the position and name of the retained SNPs for each of the 17 natural accession crosses are shown.

**Table S8: Fold change recombination intensities:** Recombination intensity (cM/Mb) of pericentromeric regions, AT - zones and chromosome arms compared to chromosome average. For the F<sub>2</sub> populations the median value is shown with its range. (A): fold-increase relative to chromosome average (intensity region / intensity chromosome average). (B): fold-decrease relative to chromosome average (intensity chromosome average / intensity region).

**Table S9: Fine-mapping individual recombination breakpoints:** Name refers to the left DMR that was used initially to identify each breakpoint interval within pericentromeric regions. Intervals were narrowed down first by considering all of the parental DMRs included in these intervals and that fulfill the Mendelian segregation criterion. Some intervals could be further narrowed down by considering individual probes outside of DMRs and for which parental DNA methylation states (M in wild type and U in *ddm1*) segregate in Mendelian fashion. Column F indicates the number of epiRILs with breakpoints in the corresponding interval and column G the

proportion of breakpoints contributed by this interval to the total number of recombinants for that chromosome.

**Table S10: Fine-mapping of shared recombination breakpoints:** Location and length of shared breakpoint intervals, and the number of epiRILs with a shared breakpoint interval.

**Table S11: Genetic lengths and fold change recombination intensity:** Estimated genetic lengths (A), and fold change in recombination intensity (FC) of pericentromeric regions (B), AT-zones (C) and chromosome arms (D). FC = intensity of region / intensity chromosome average. Lower and upper bounds are given by 95% confidence intervals. These tables show the ordering of the 17 F<sub>2</sub> crosses (Salomé et al, Heredity 2012) shown in Figure 3 of the main text. These crosses are: P2: Lov-5×Sha, P3: Bur-0×Bay-0, P6: Van-0×Bor-4, P7: NFA-8×Van-0, P8: Est-1×RRS7, P9: Tsu-1×RRS10, P10: Bur-0×Cvi-0, P12: Est-1×Br-0, P15: Br-0×C24, P17: Cvi-0×RRS7, P19: Bay-0×Lov-5, P20: Bor-4×NFA-8, P35: Tamm-2×Col-0, P66: Fei-0×Col-0, P129: C24×RRS10, P145: Sha×Fei-0, P169: Ts-1×Tsu-1.



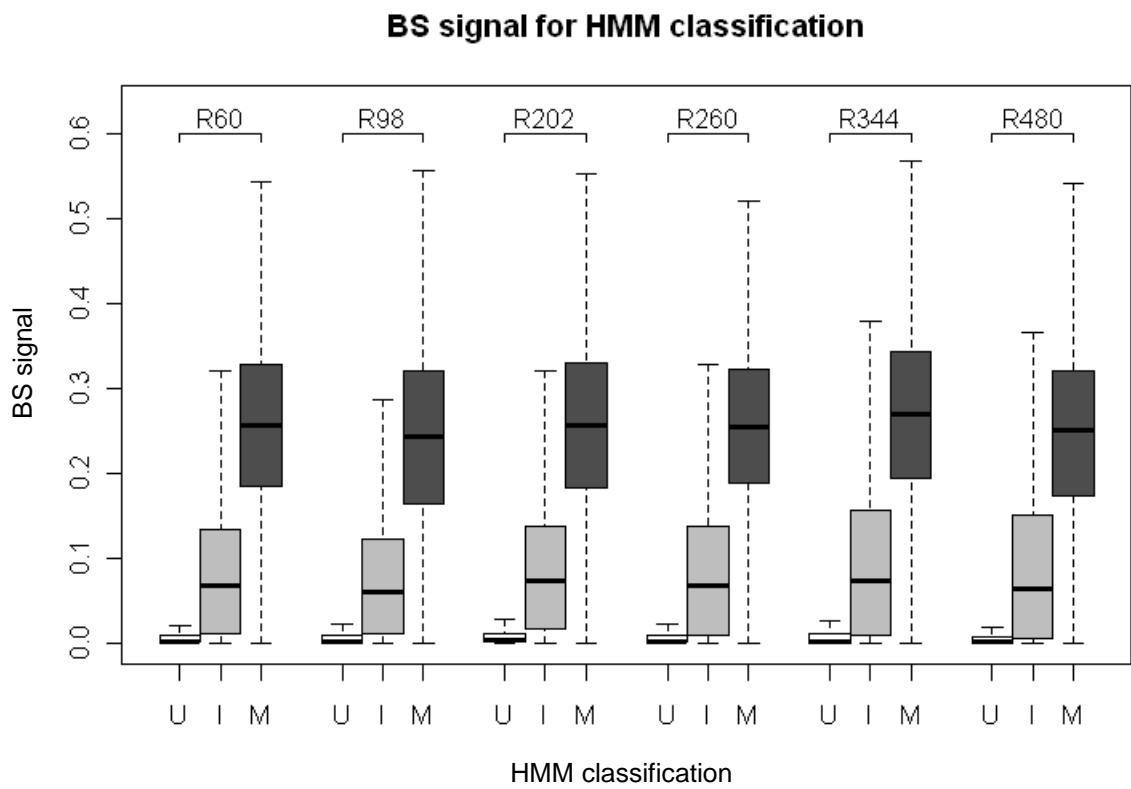

867 Mendelian DMRs

126 Mendelian DMRs used for map construction

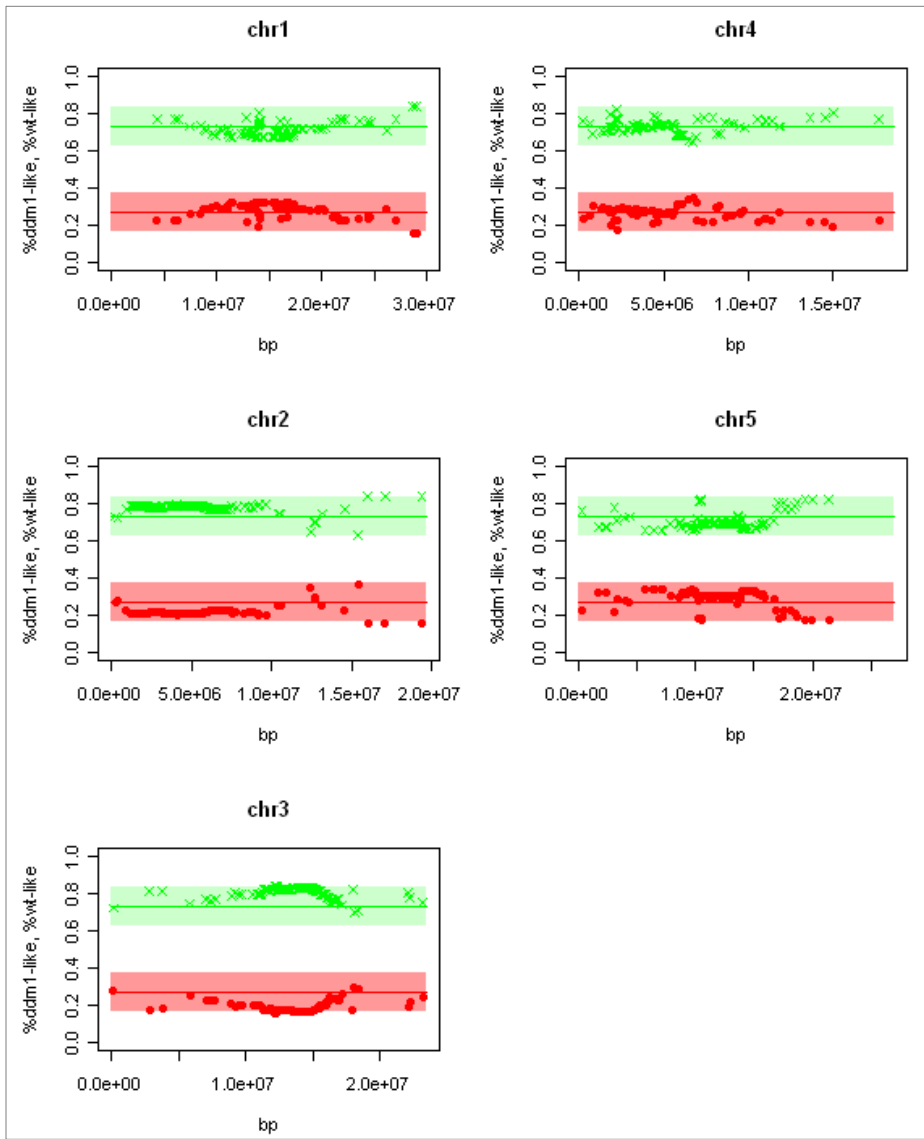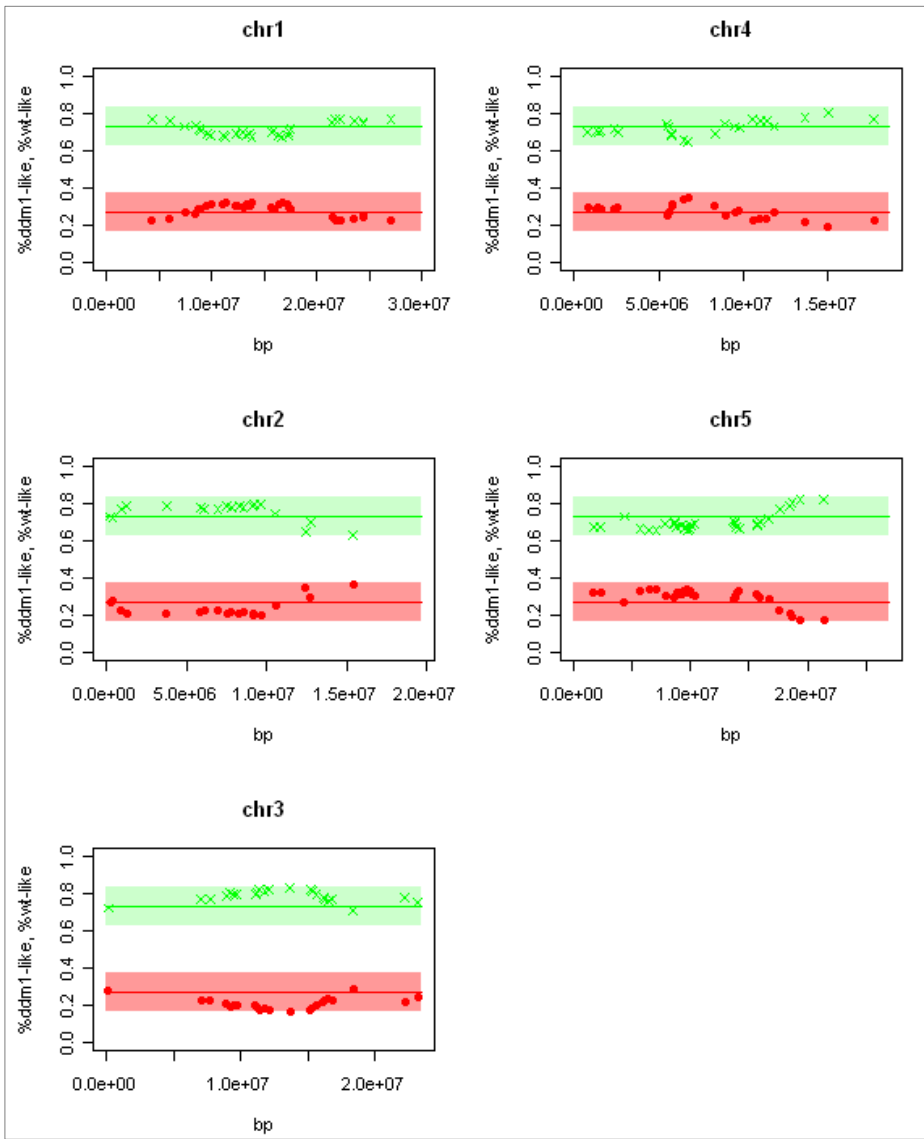

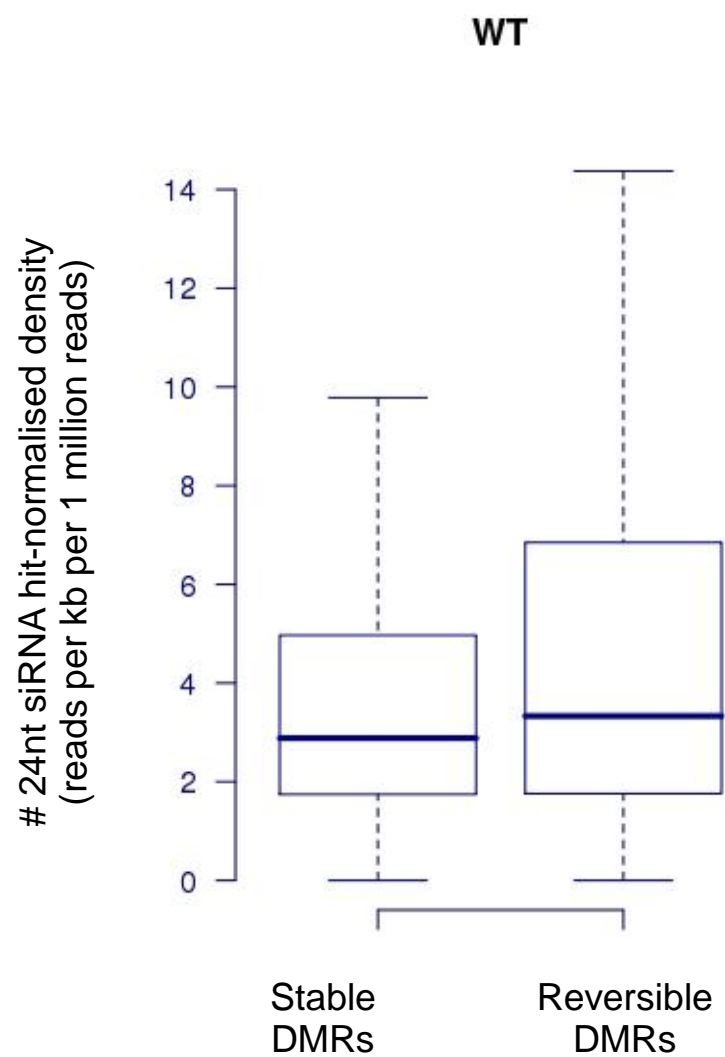

Wilcoxon rank test  
p-value = 0.0003155

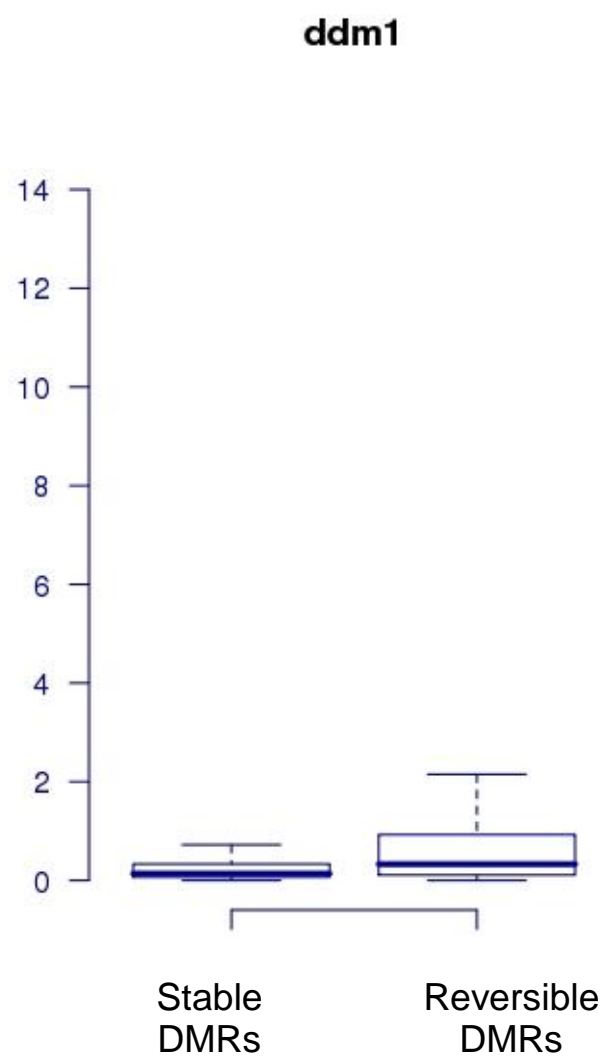

Wilcoxon rank test  
p-value < 2.2e-16

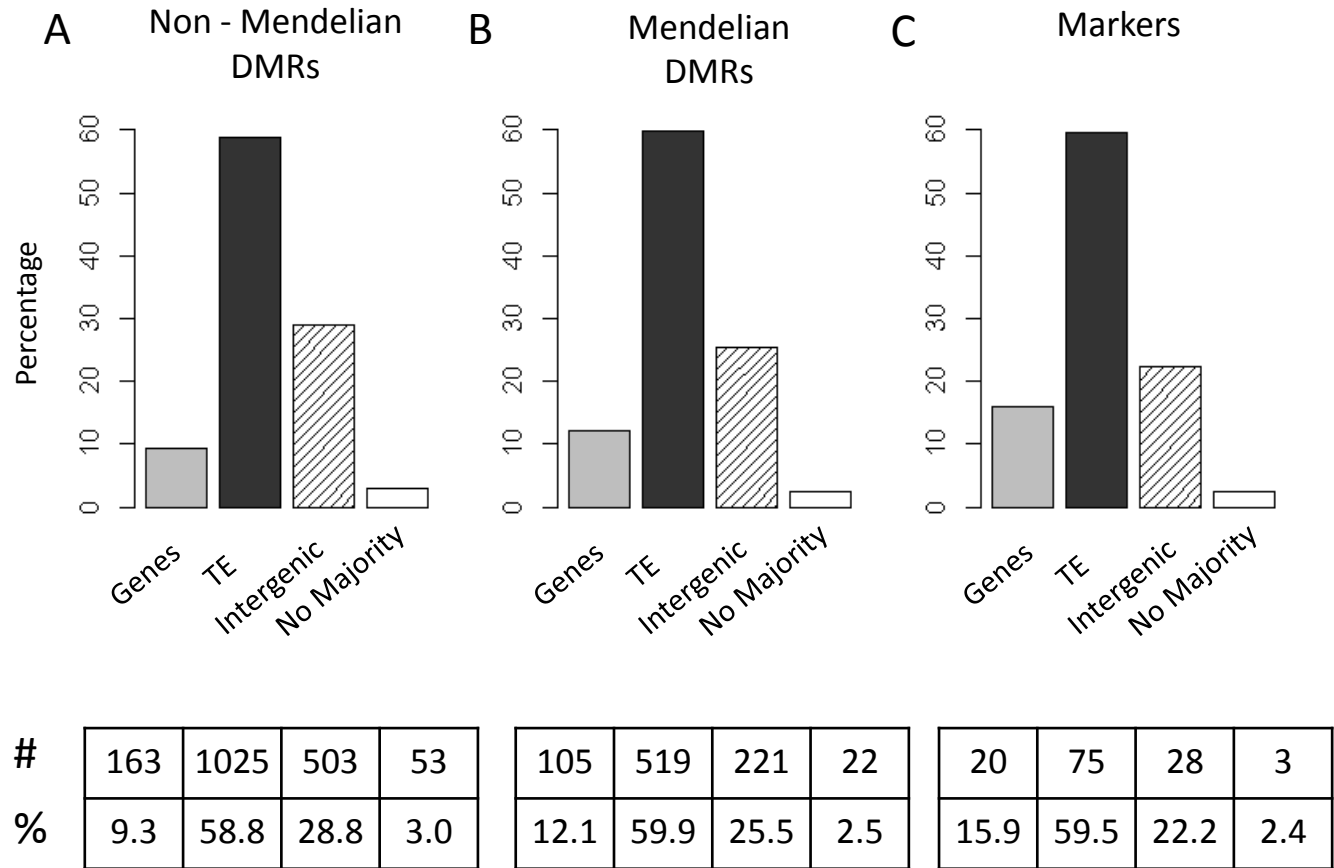

Figure S5-1

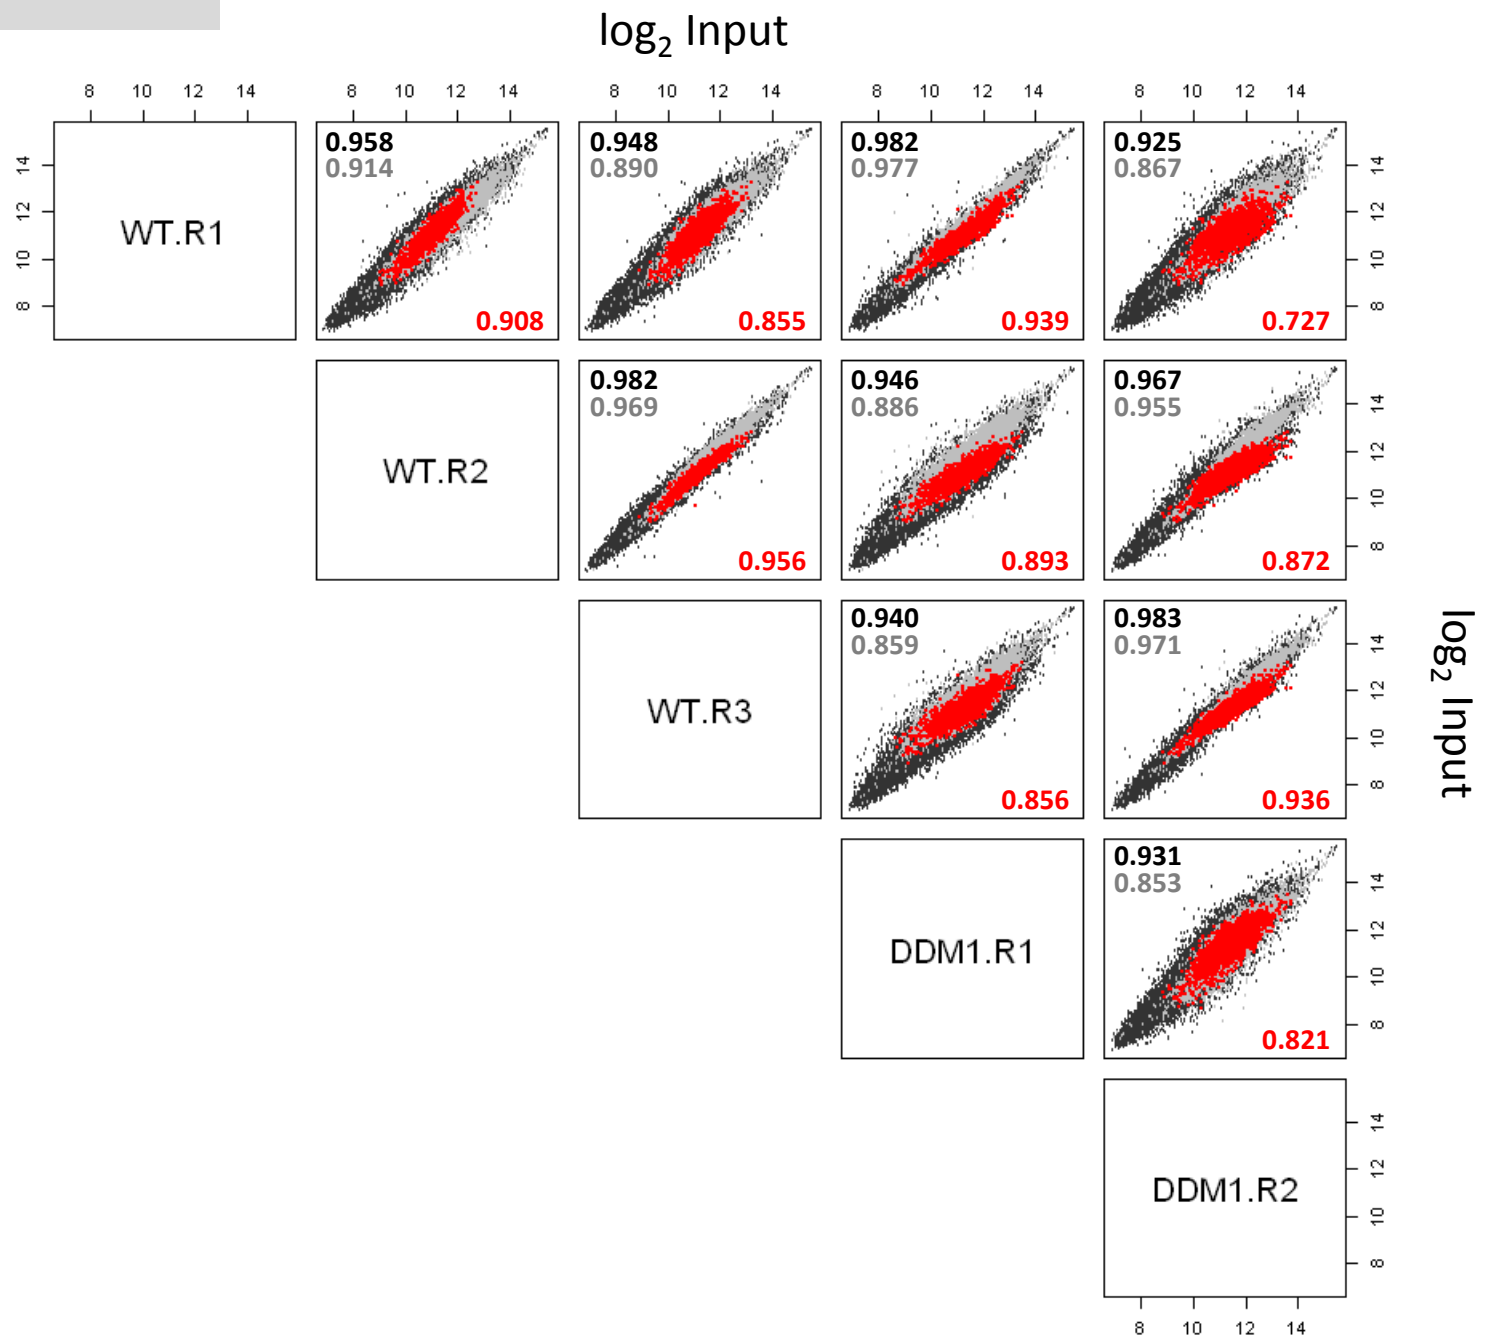

Figure S5-2

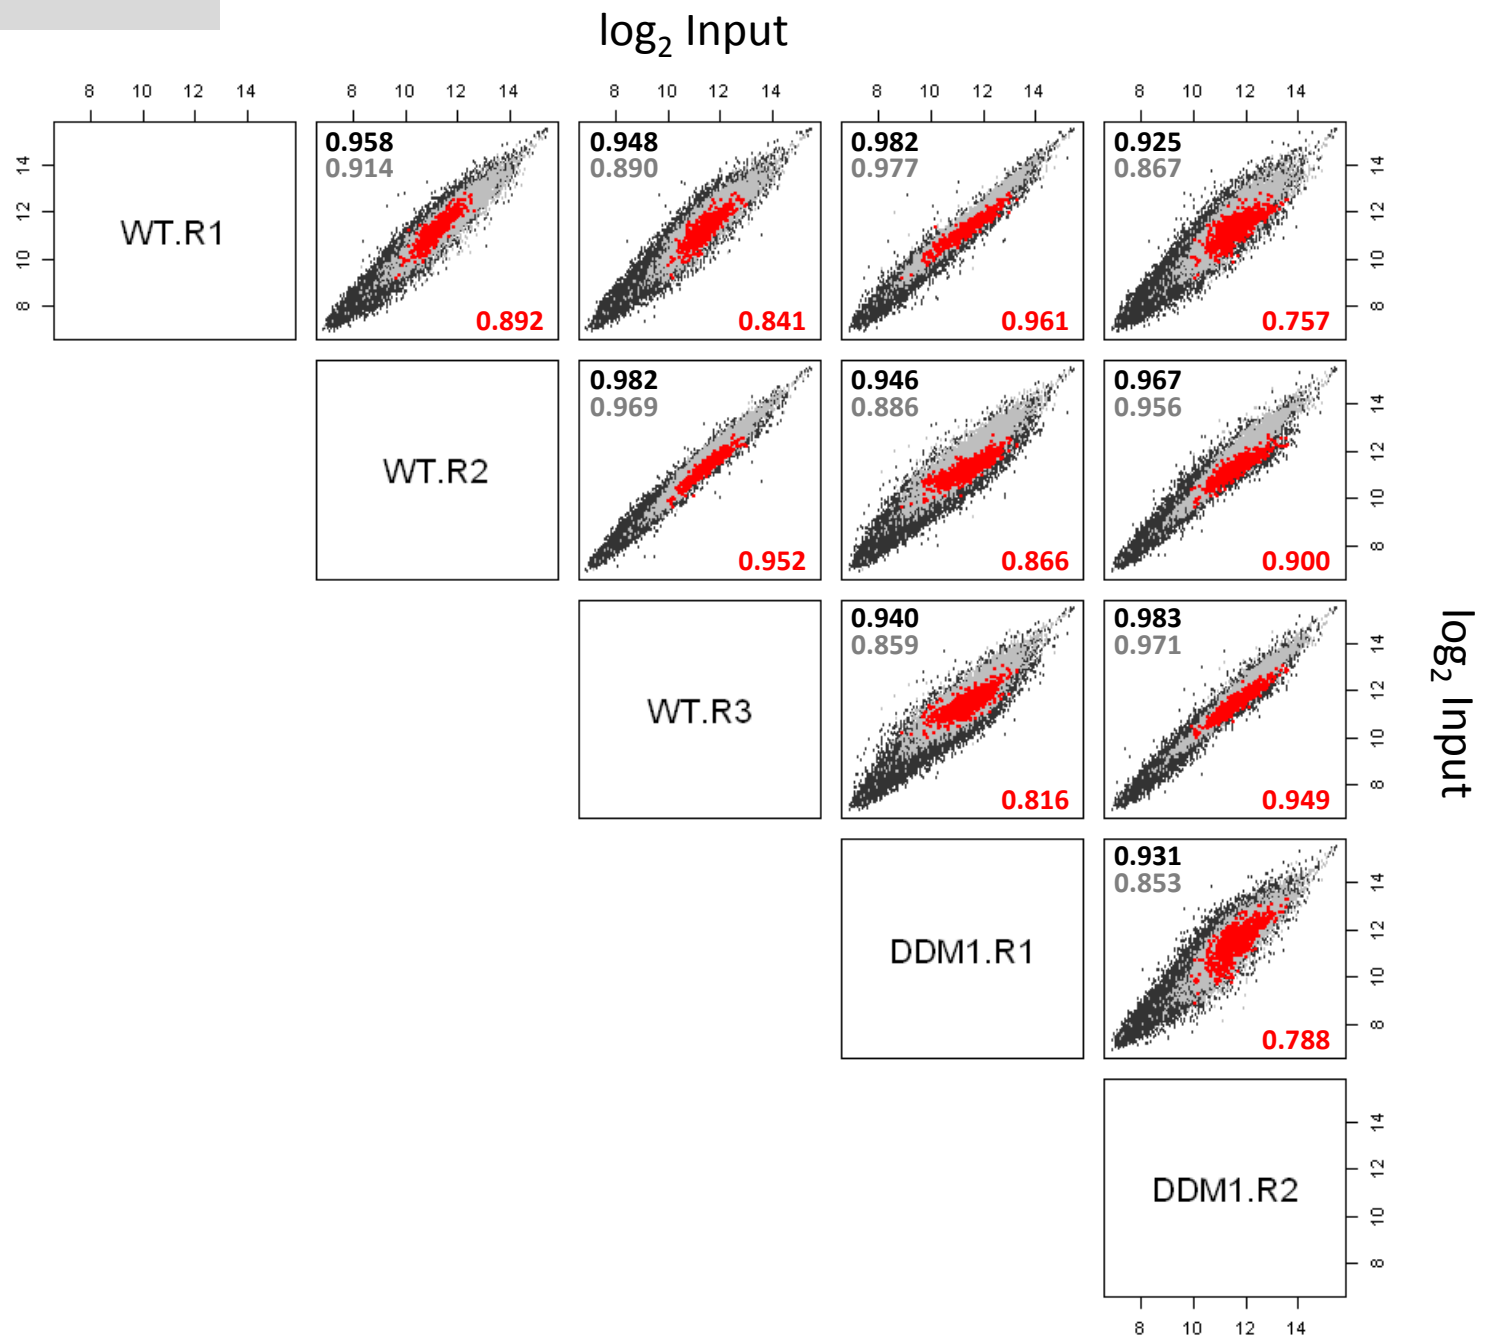

Figure S5-3

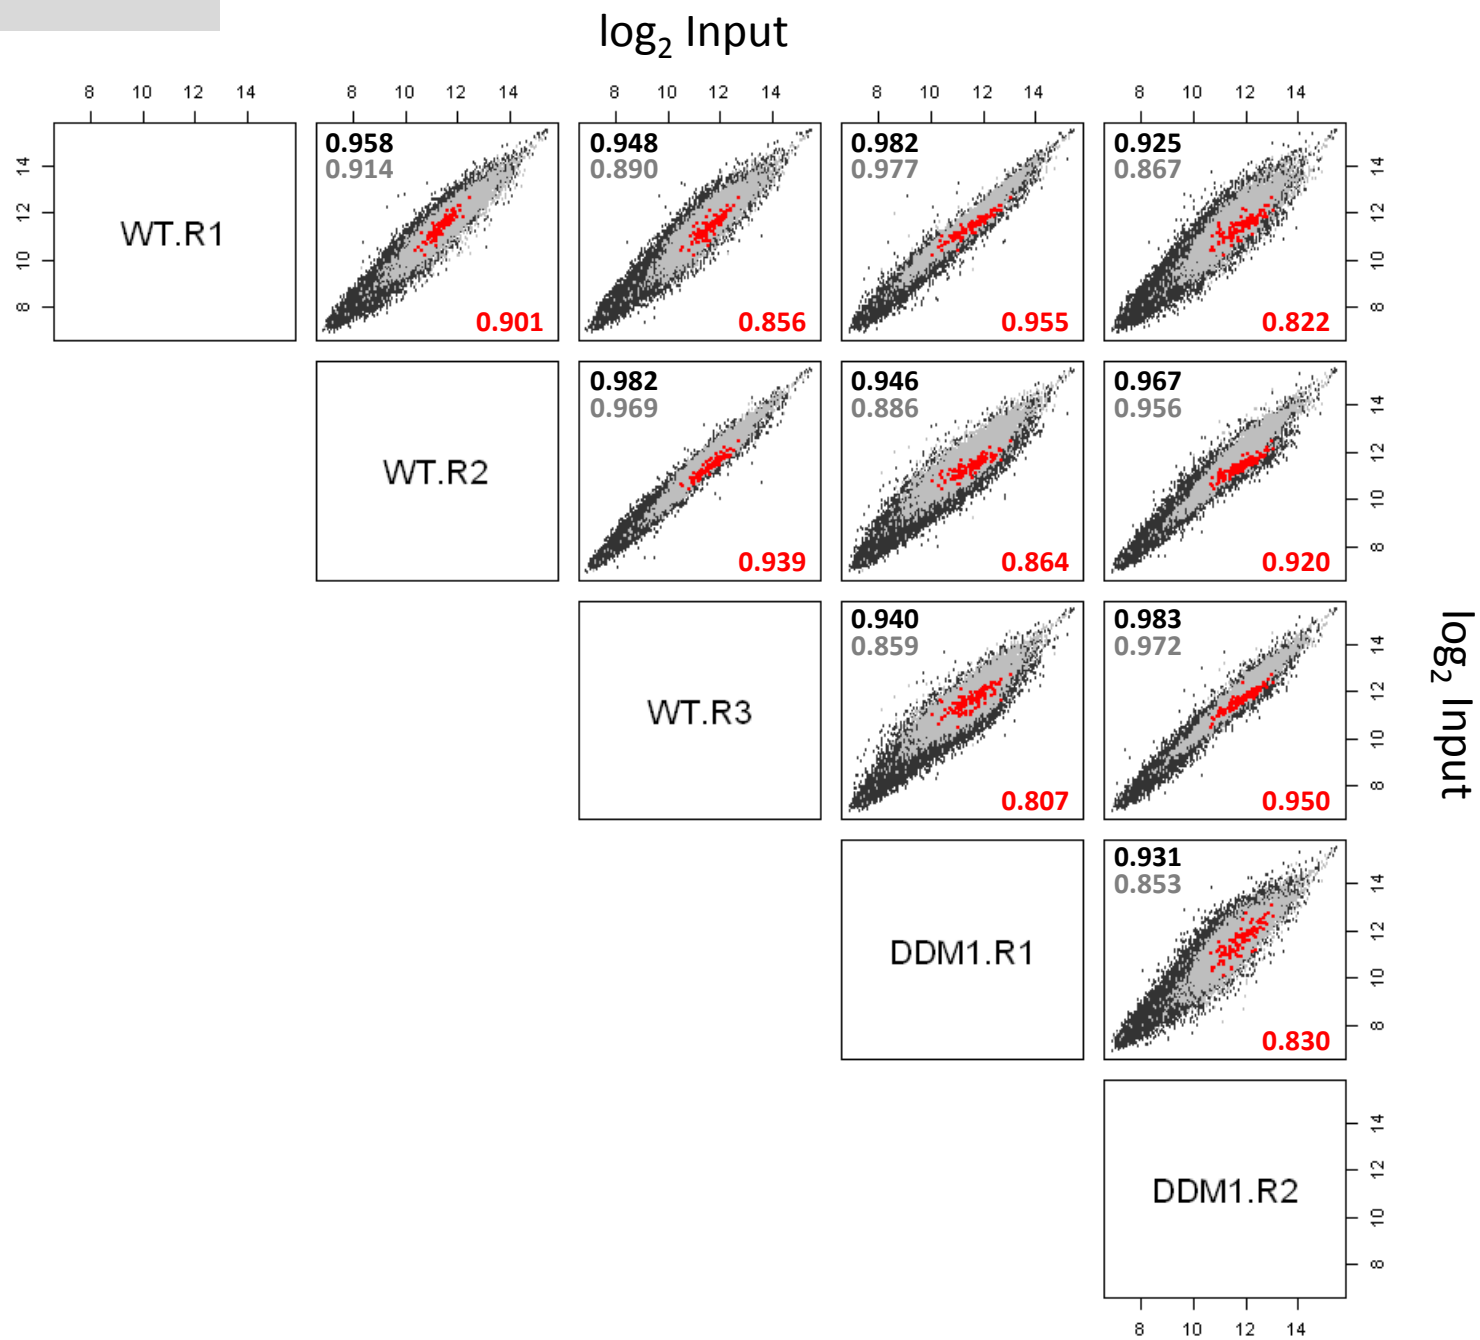

Figure S6

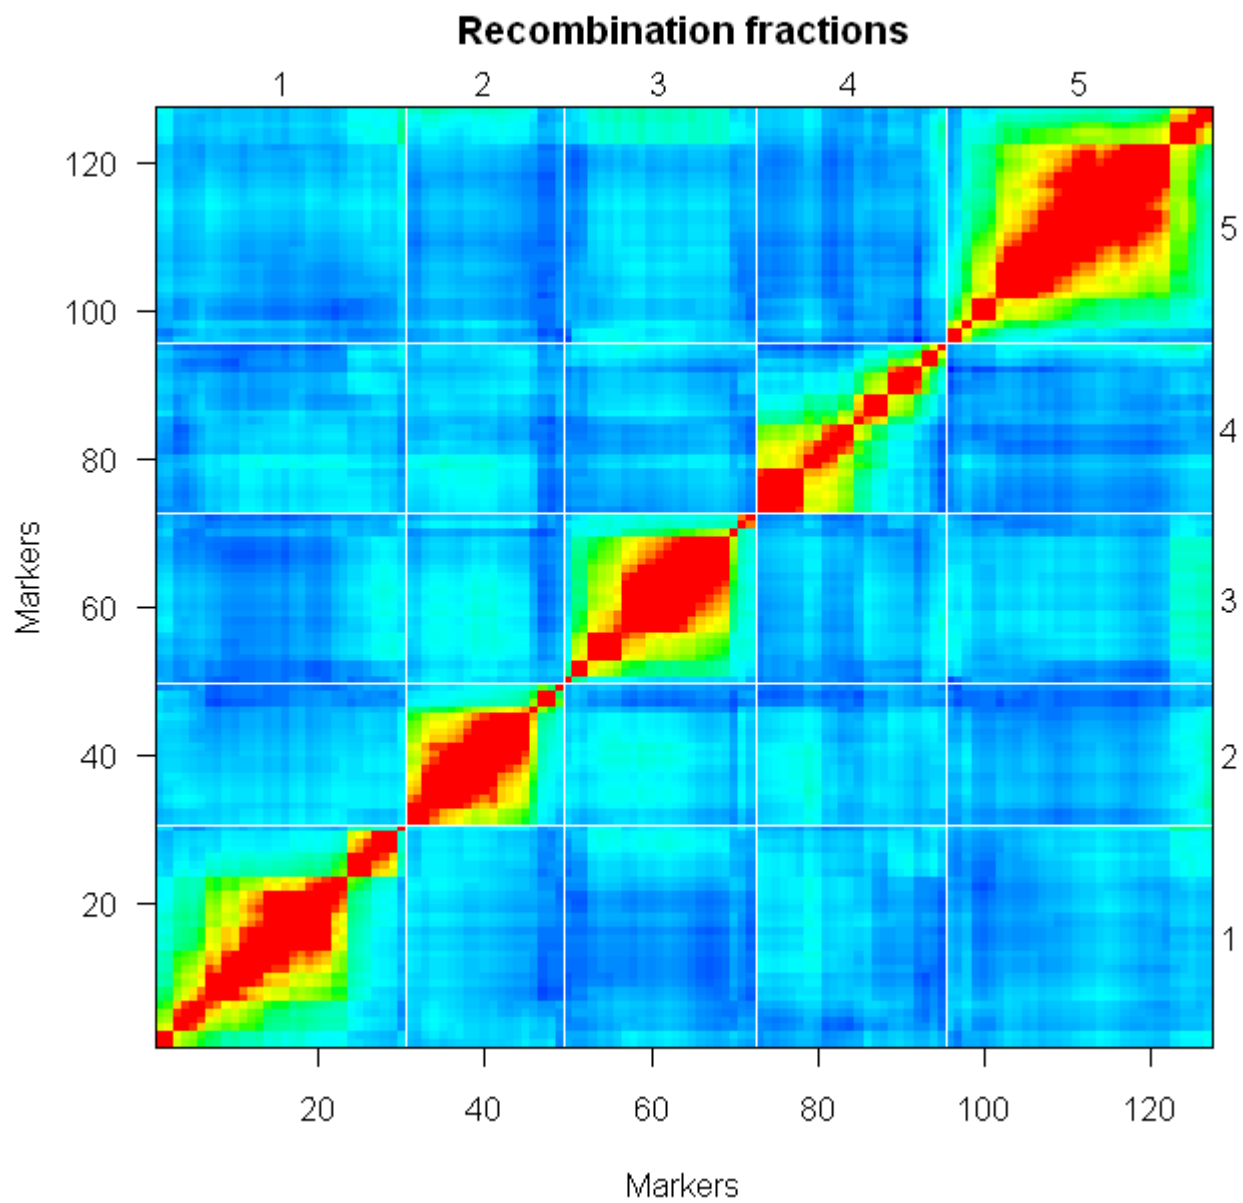



Figure S7

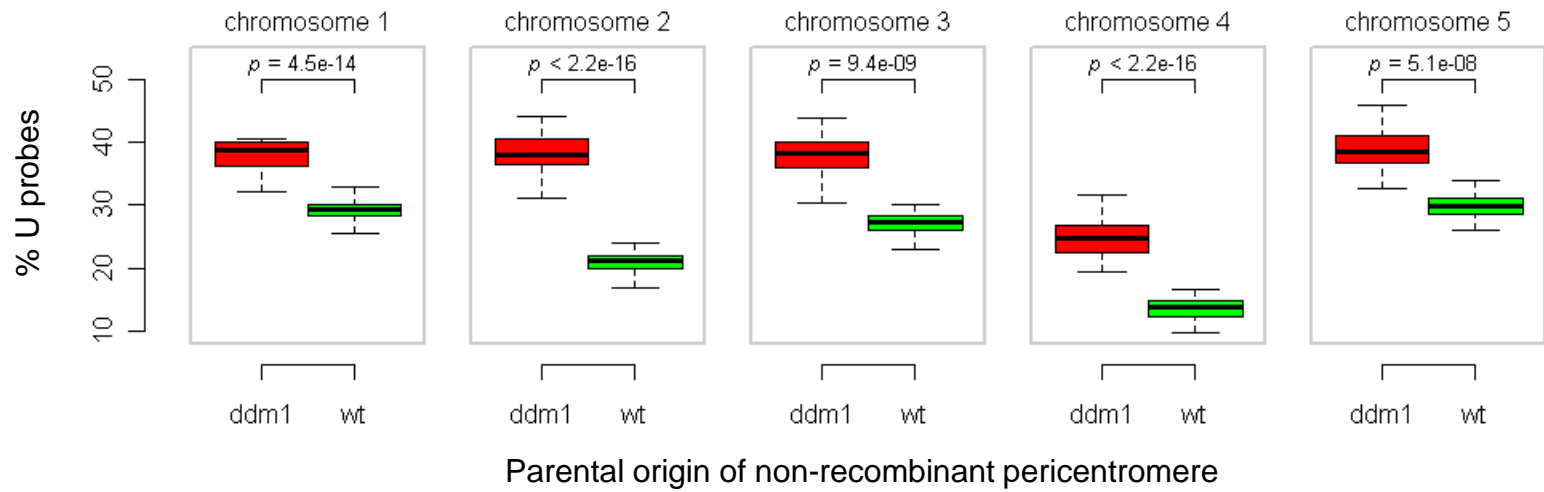

Figure S8-1

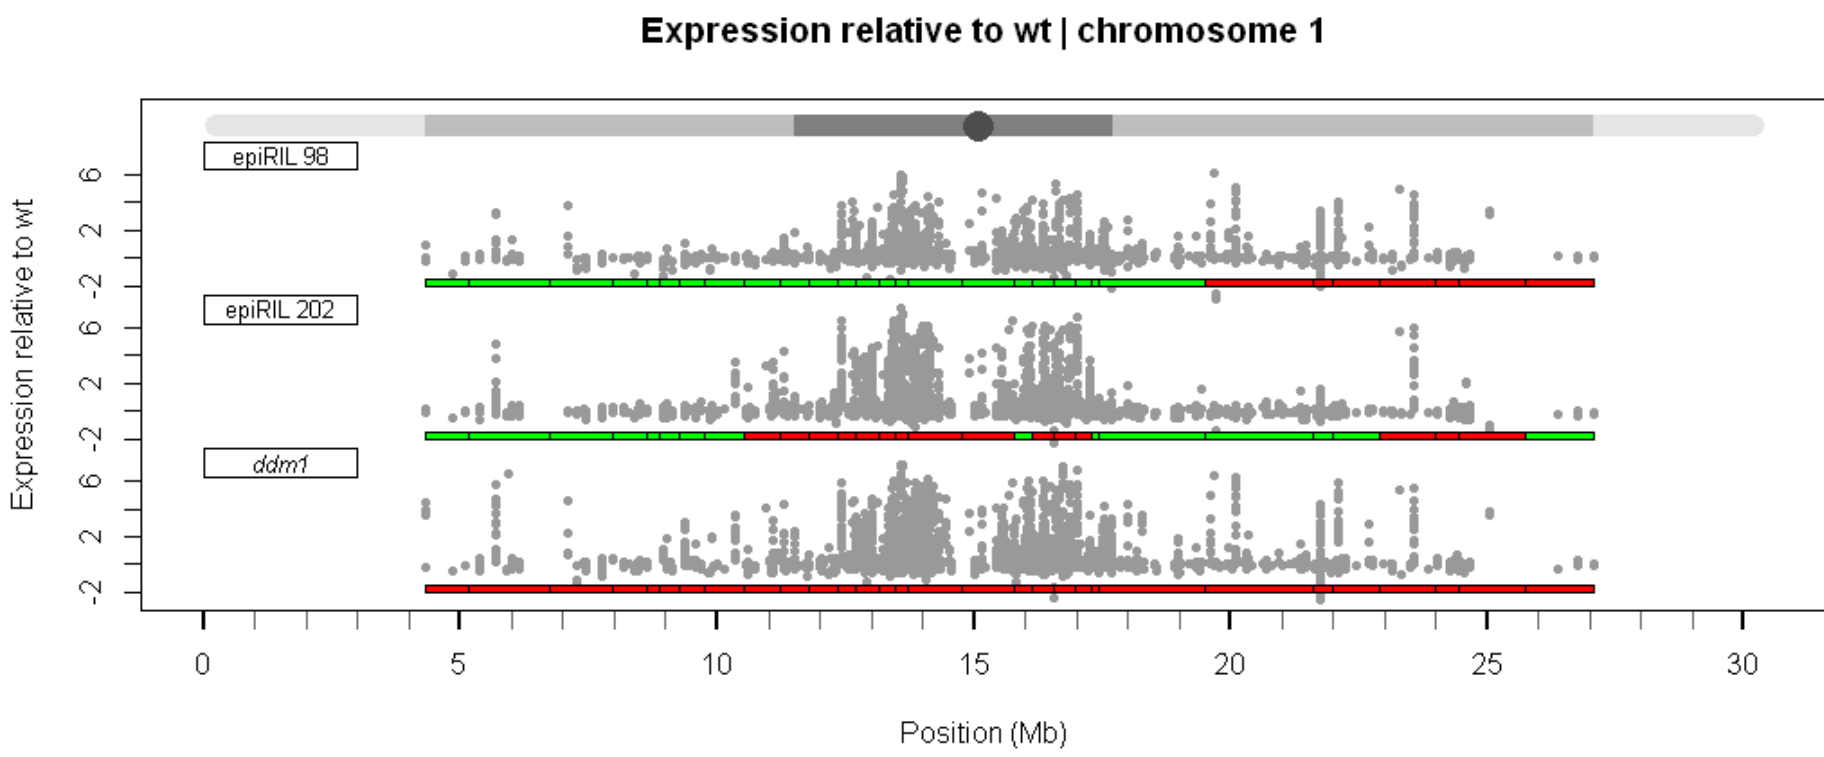

Figure S8-2

### Expression relative to wt | chromosome 2

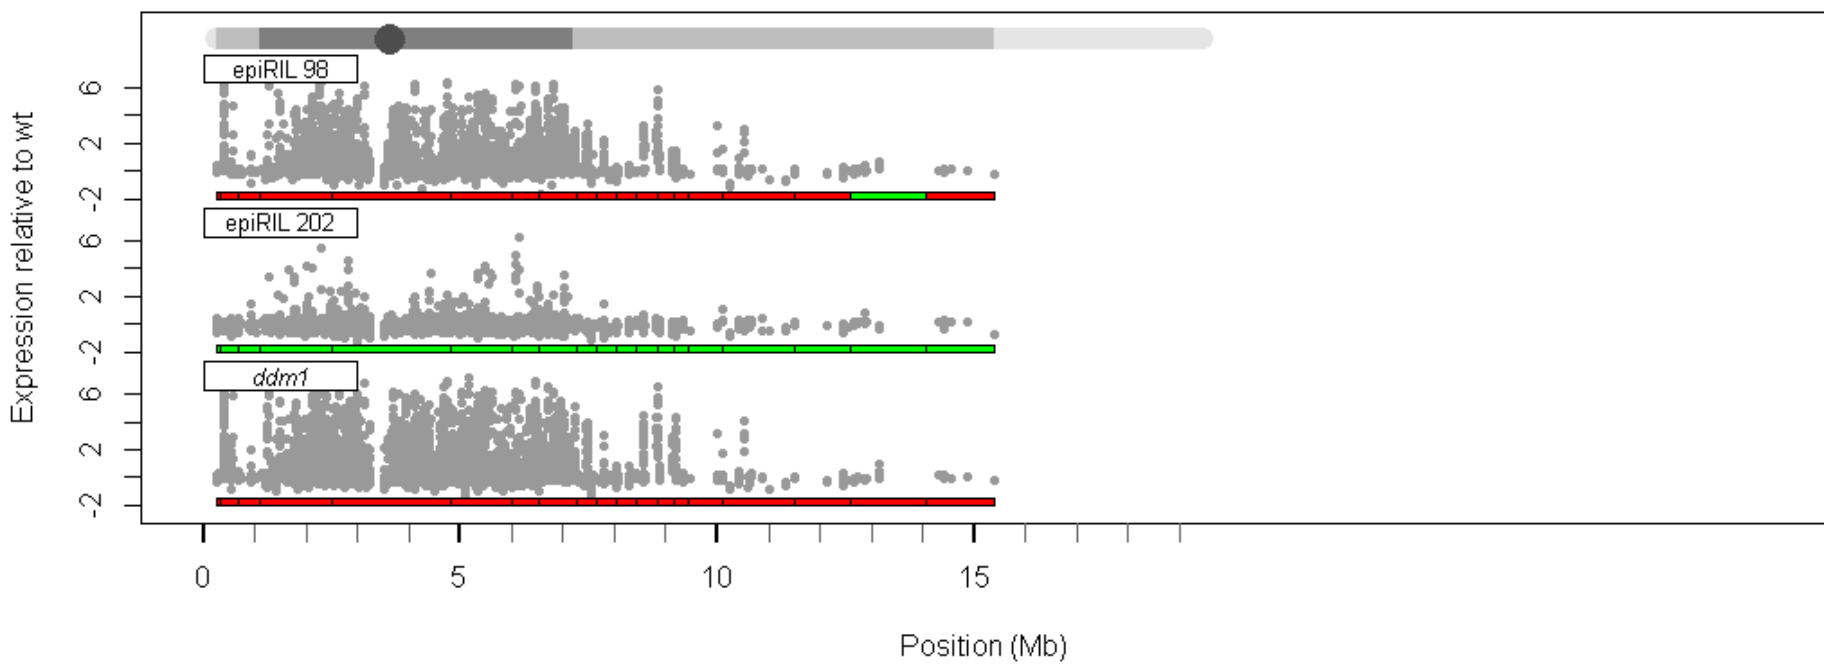

Figure S8-3

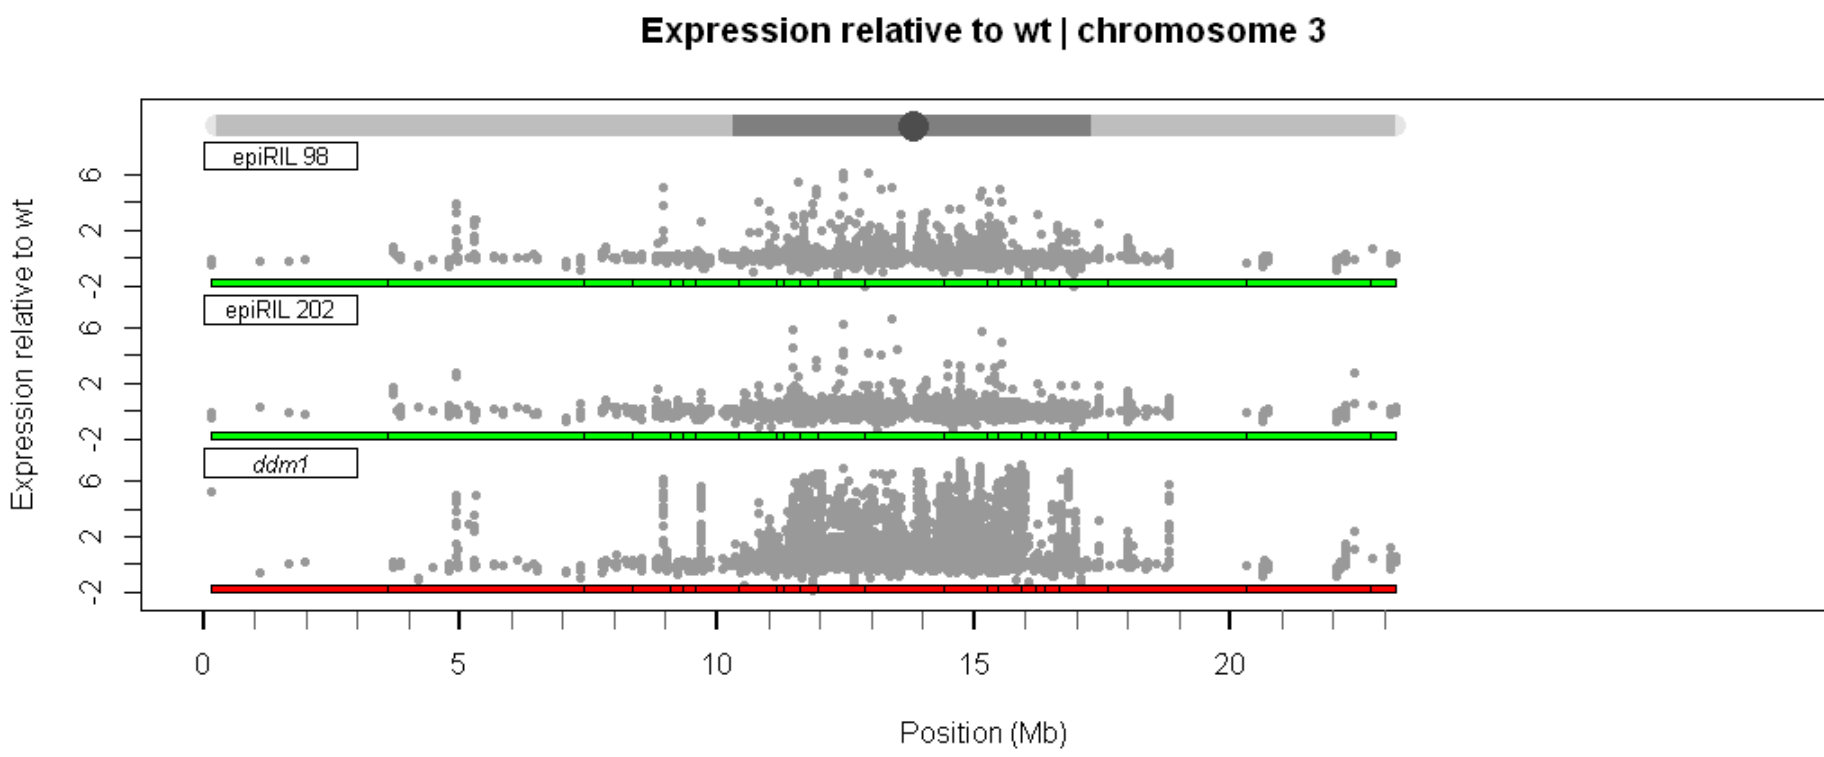

Figure S8-4

### Expression relative to wt | chromosome 4

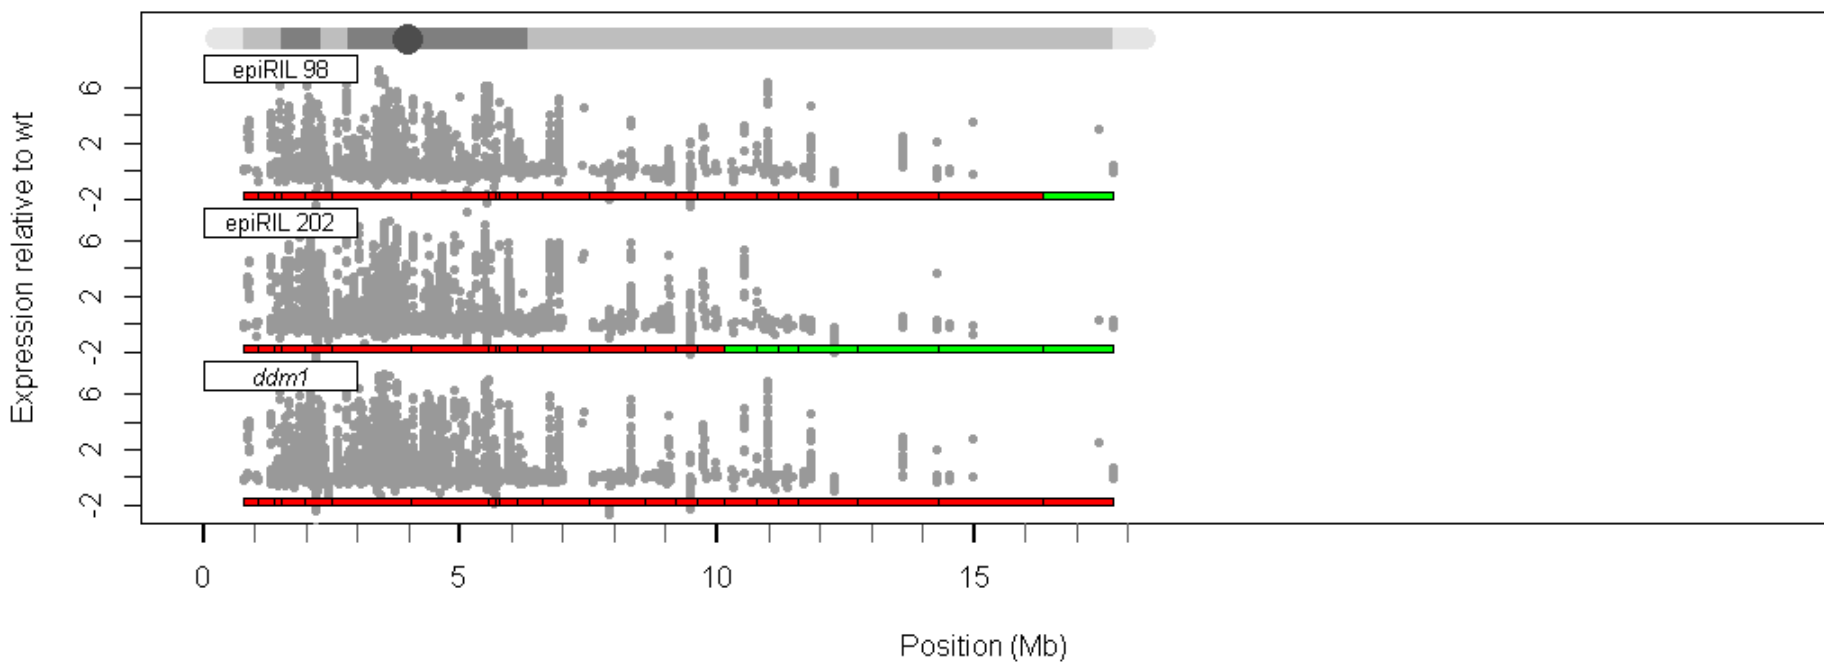

Figure S8-5

### Expression relative to wt | chromosome 5

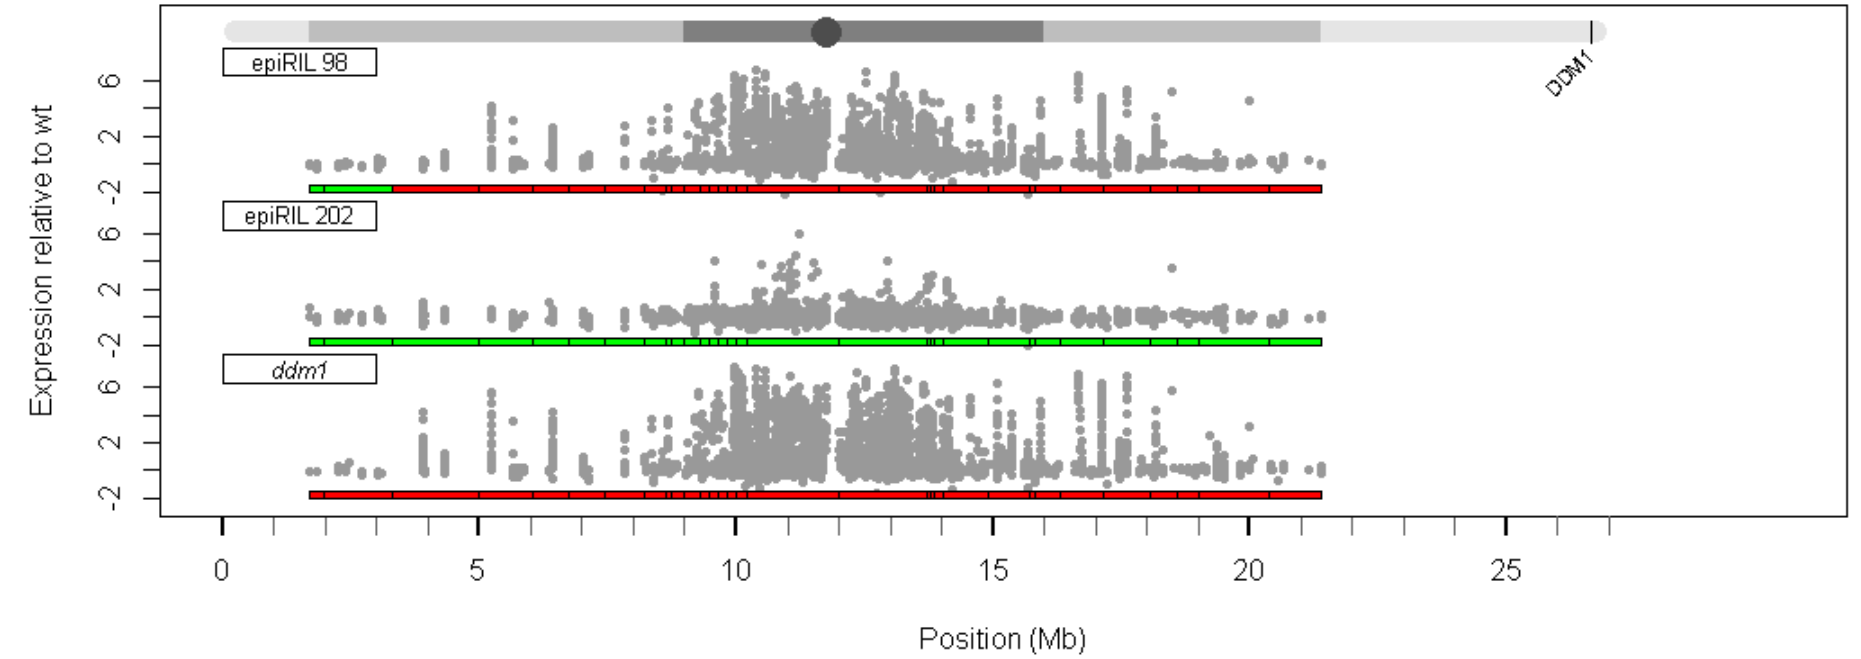

Figure S9

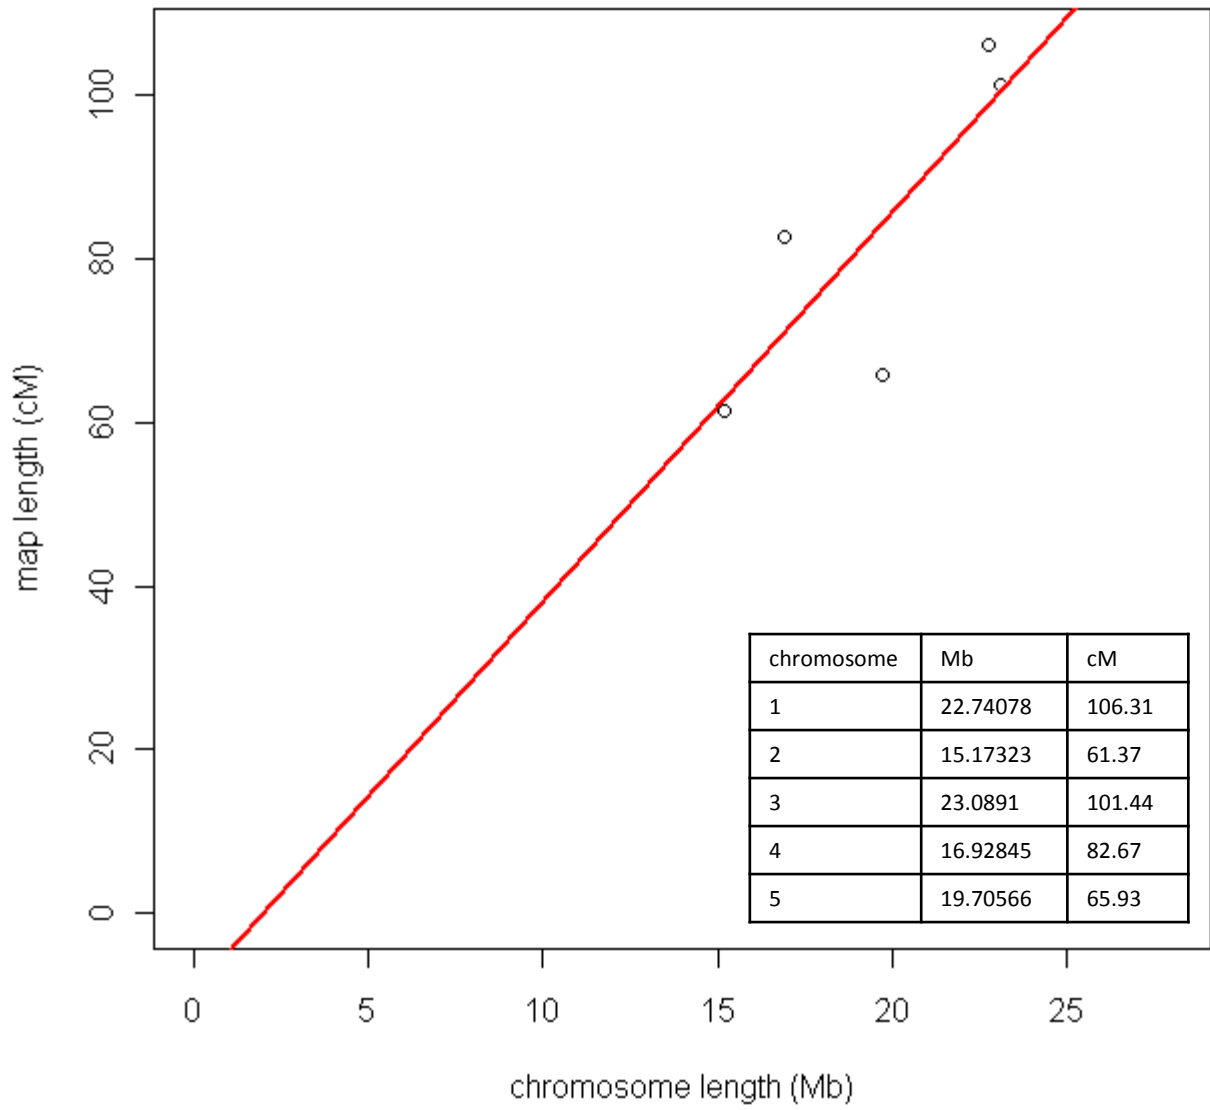

Figure S10

chromosome 1

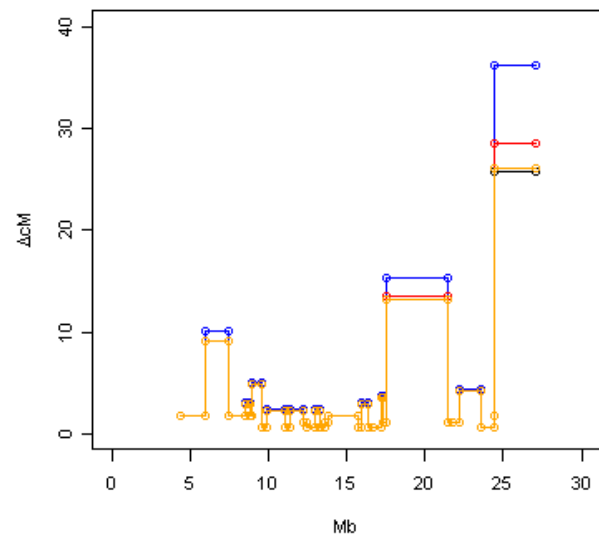

chromosome 2

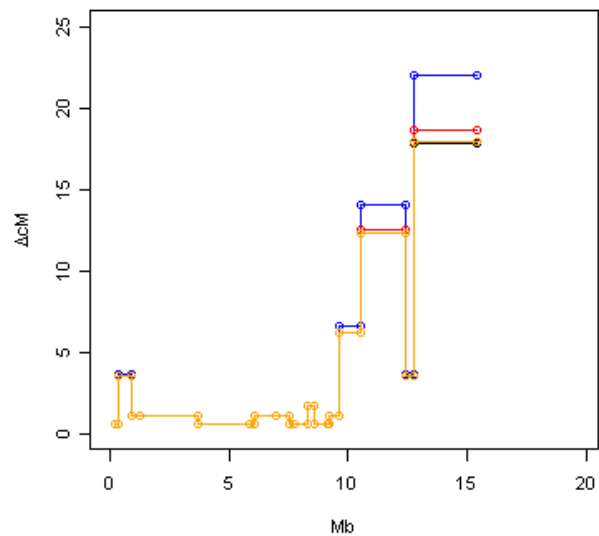

chromosome 3

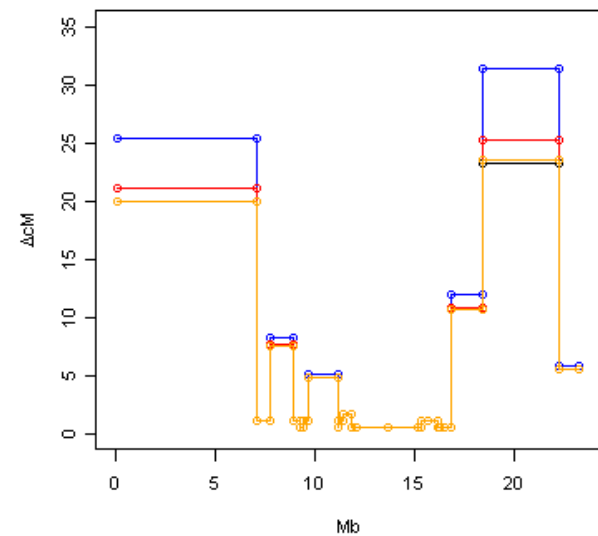

chromosome 4

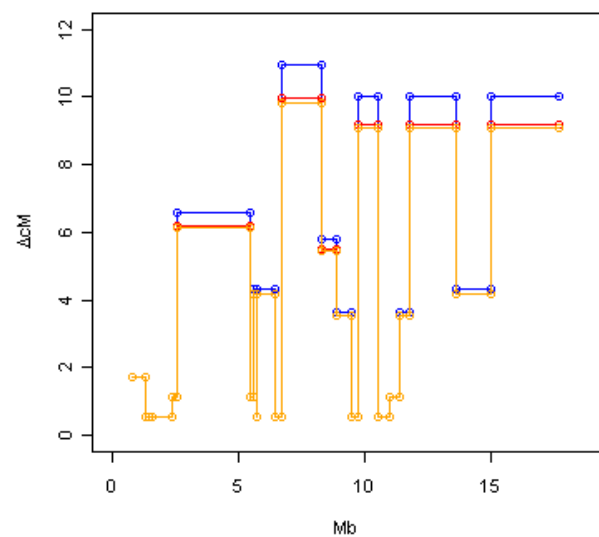

chromosome 5

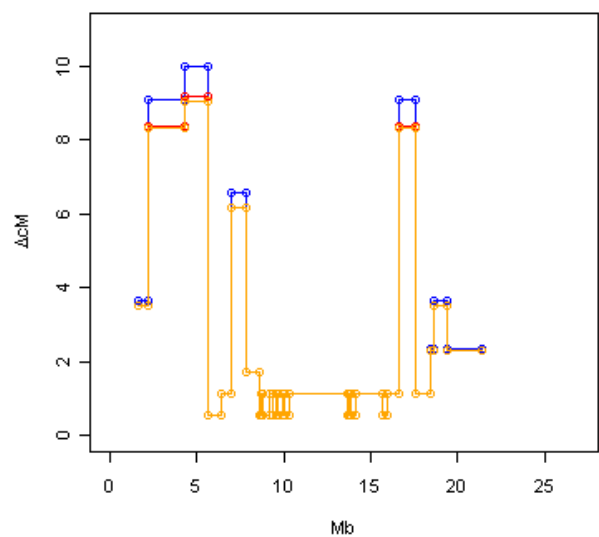



Figure S11

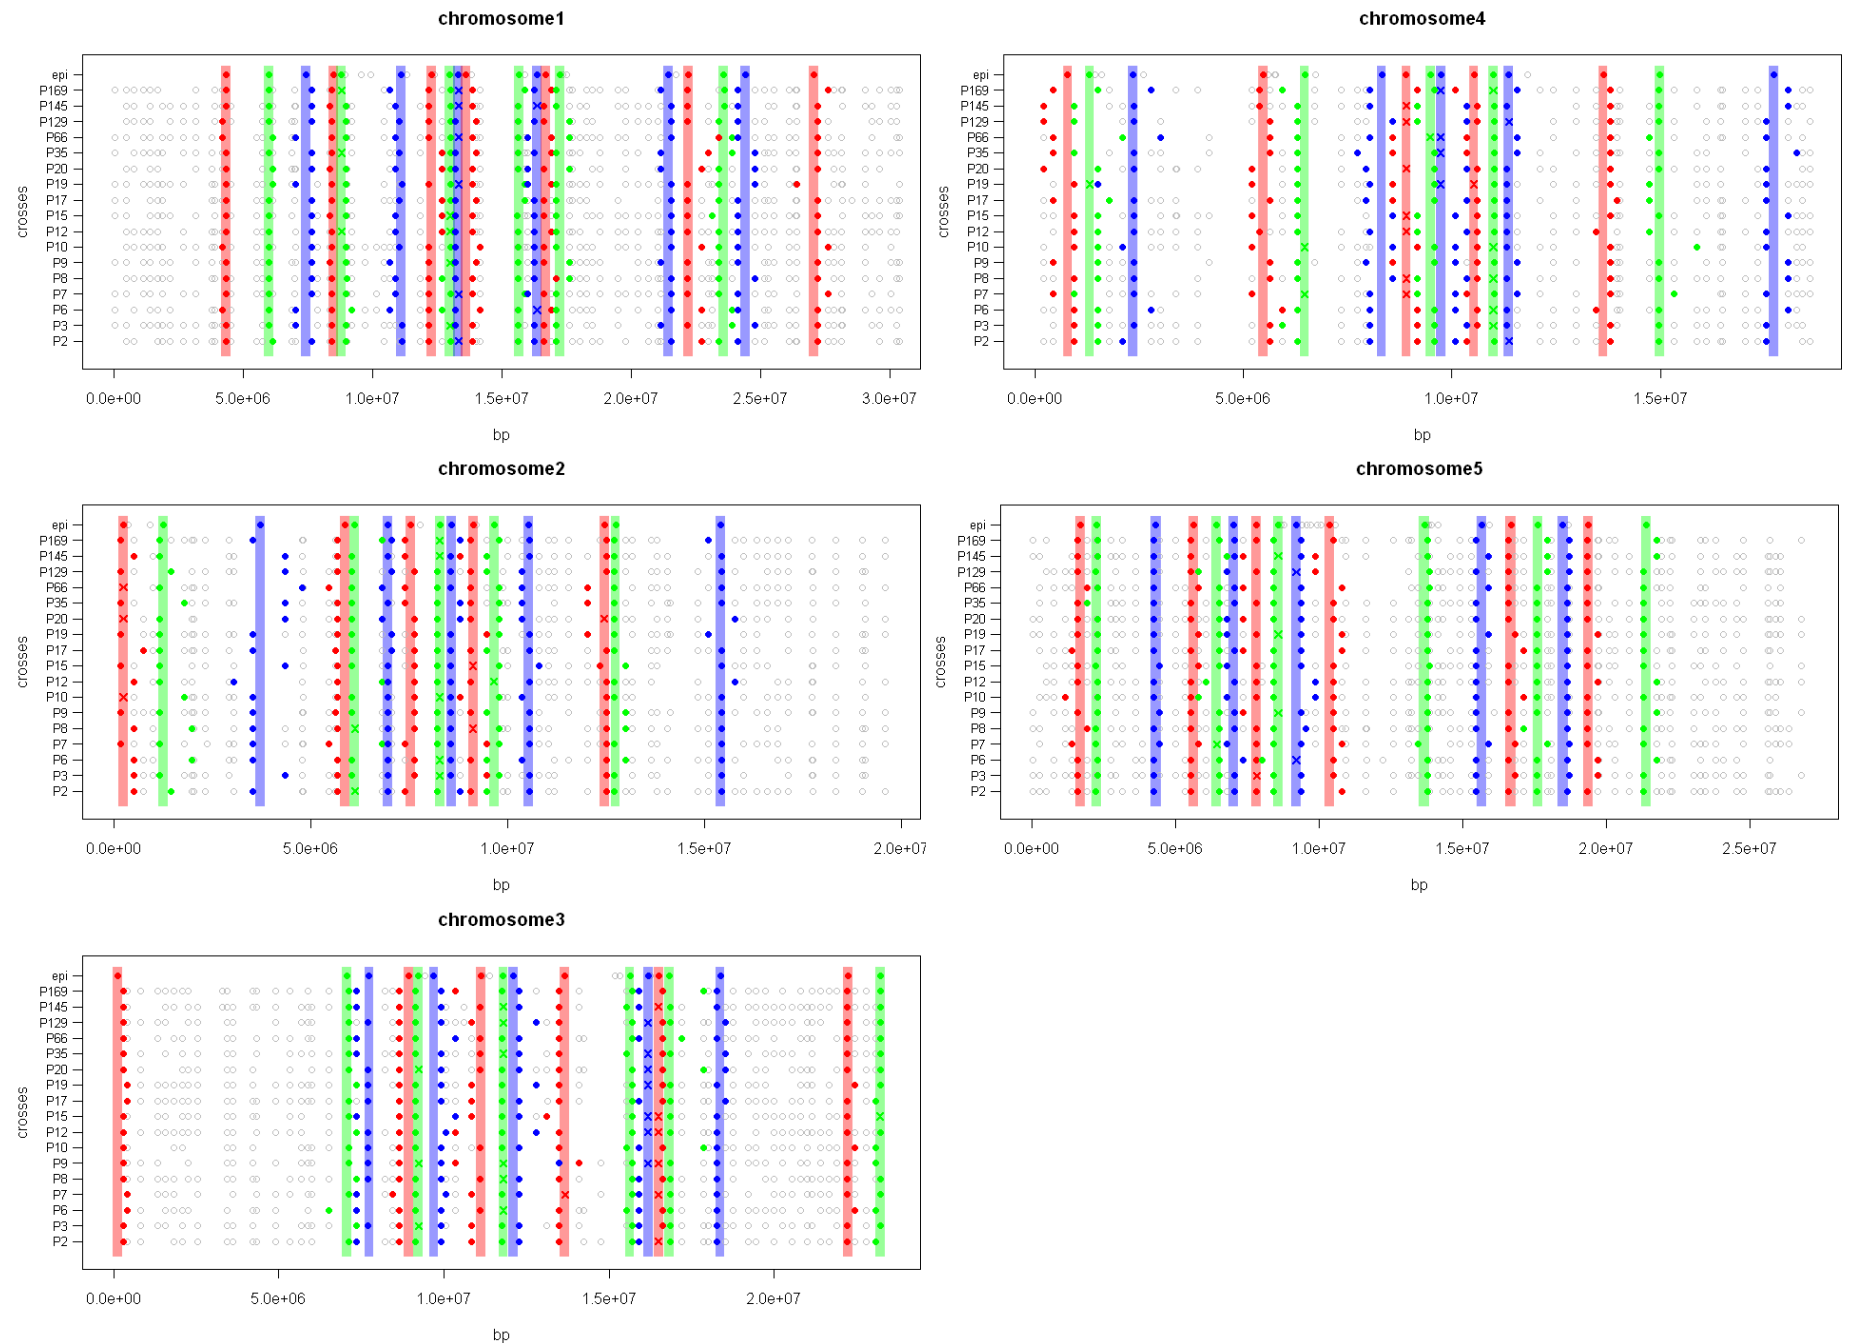

Figure S12

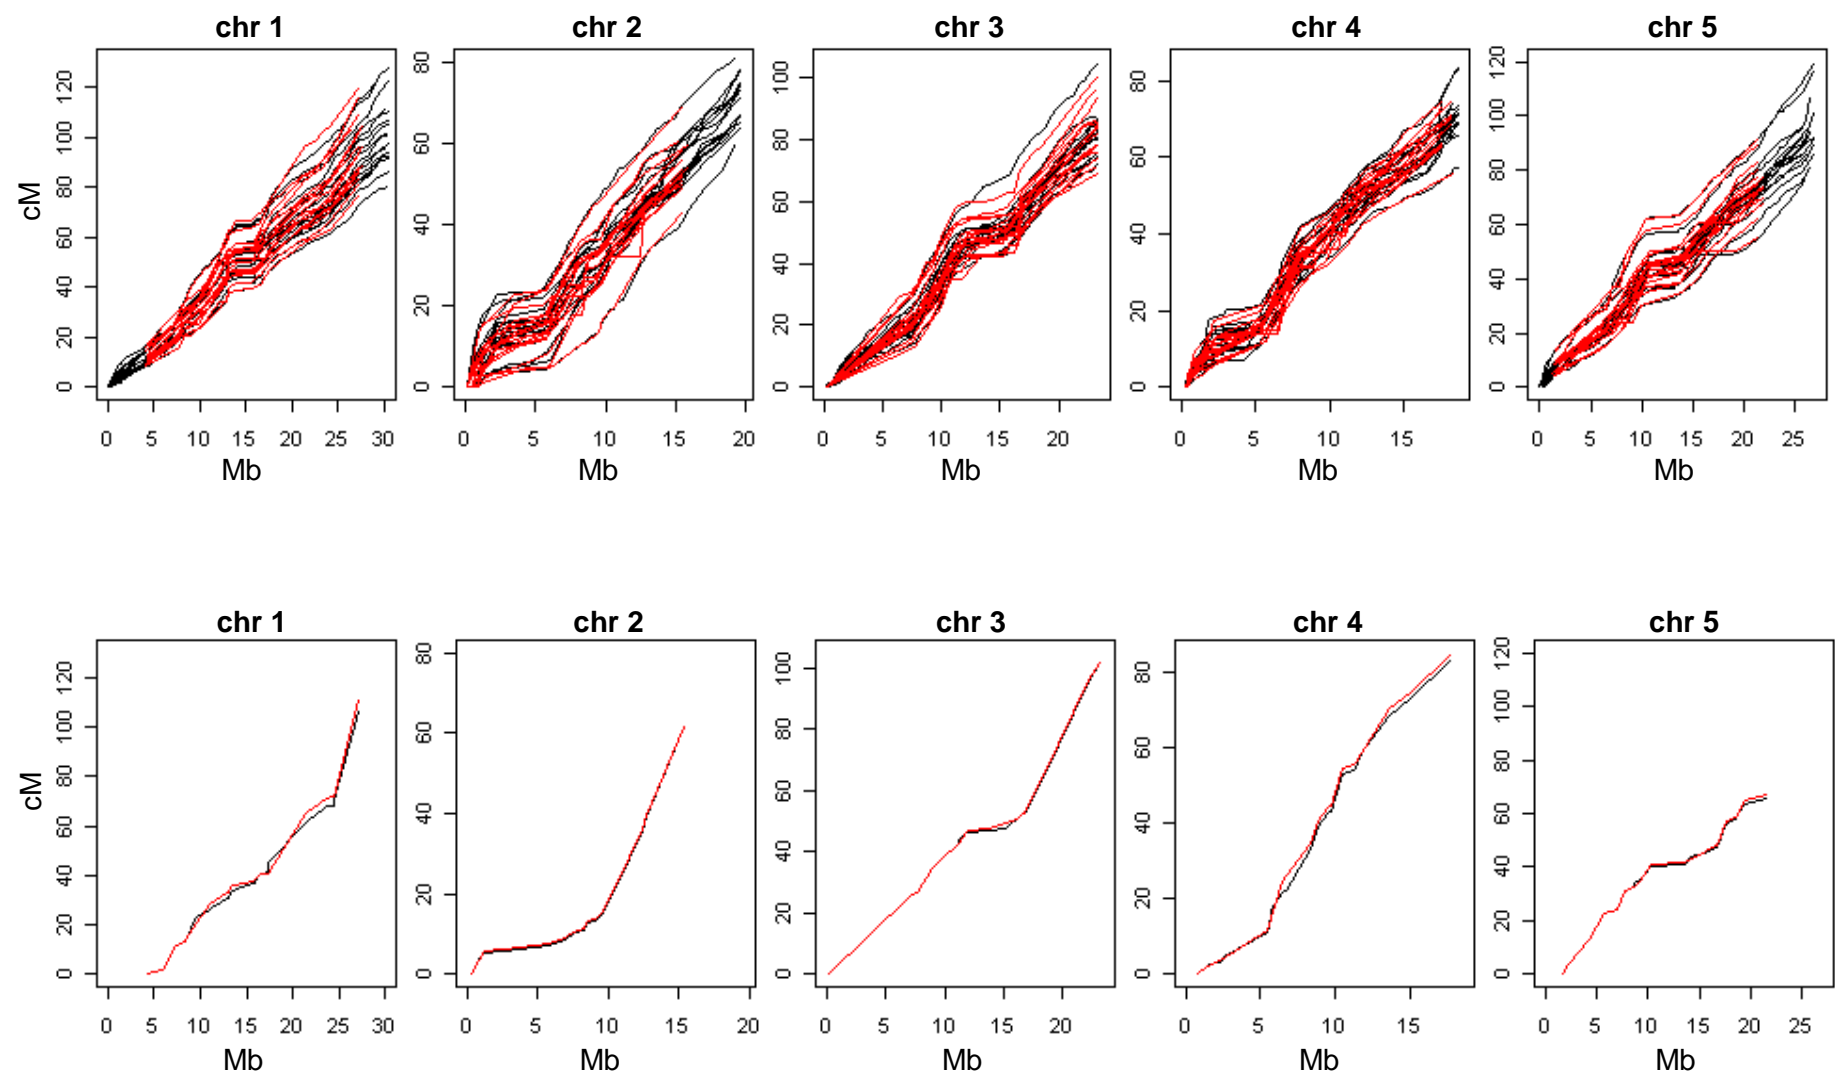

Figure S13

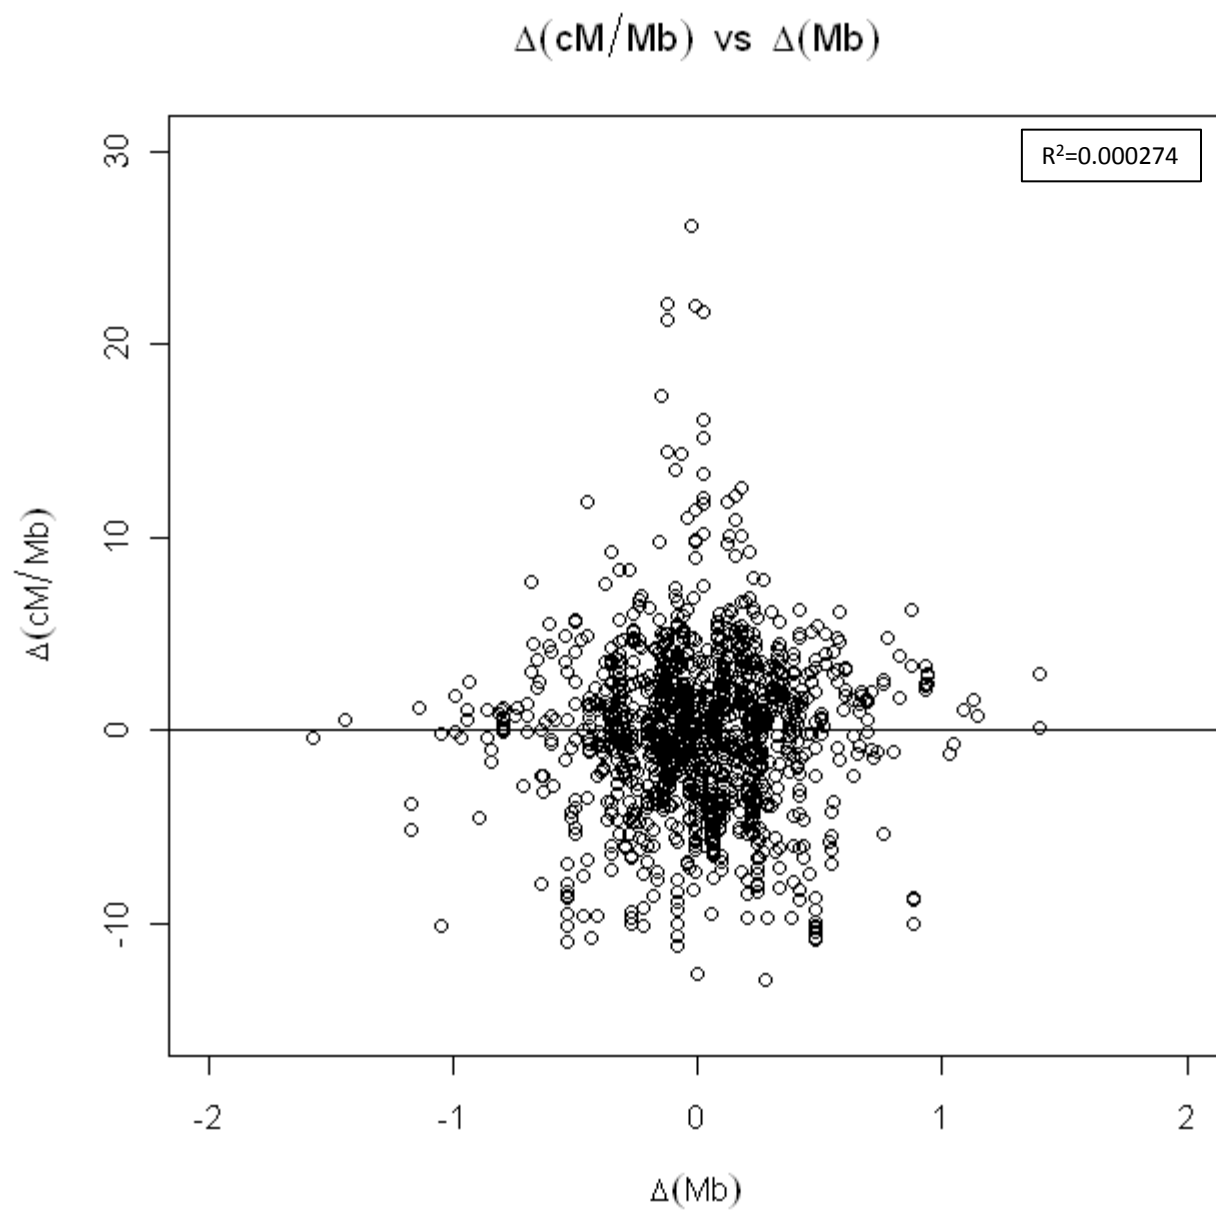

Figure S14-1

### Hotspots Horton et al. | chr 1

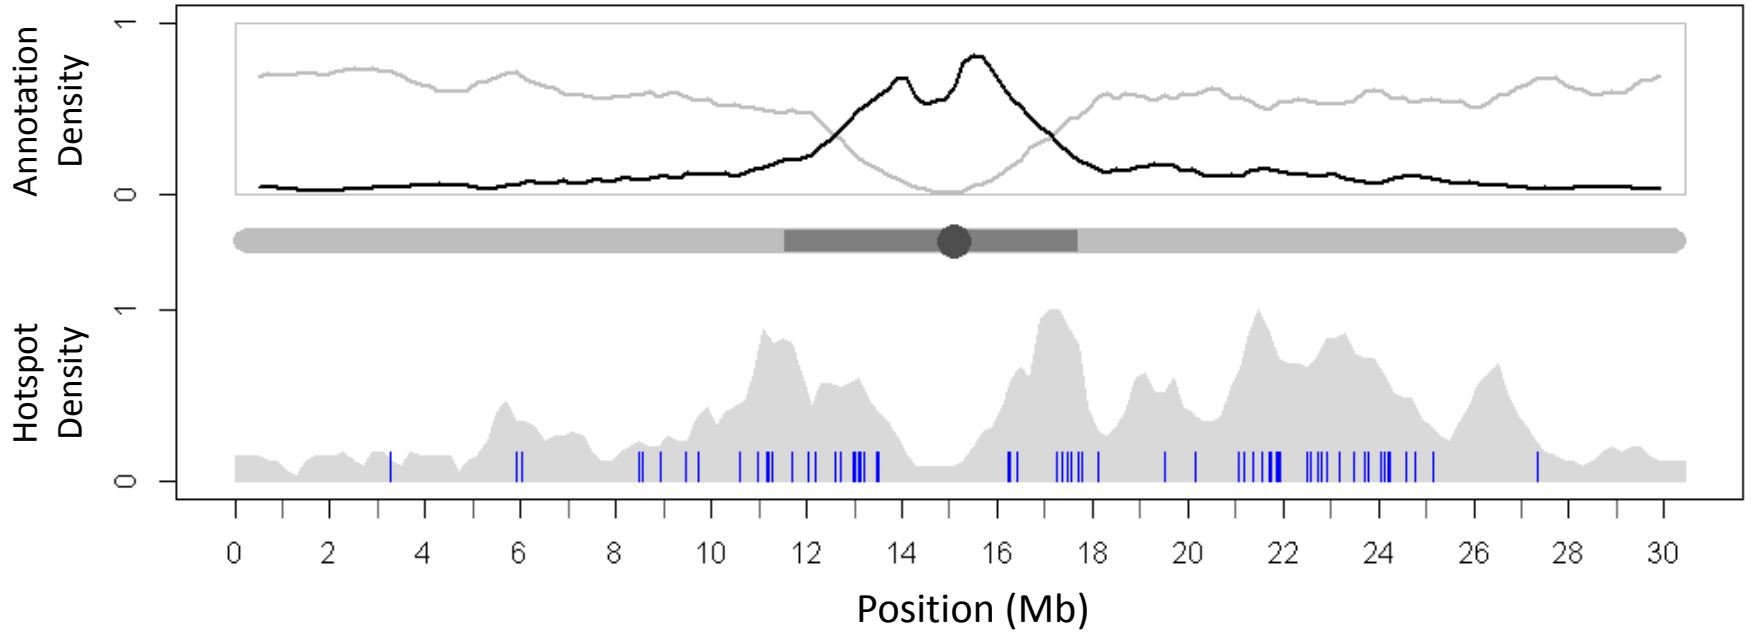

Figure S14-2

### Hotspots Horton et al. | chr 2

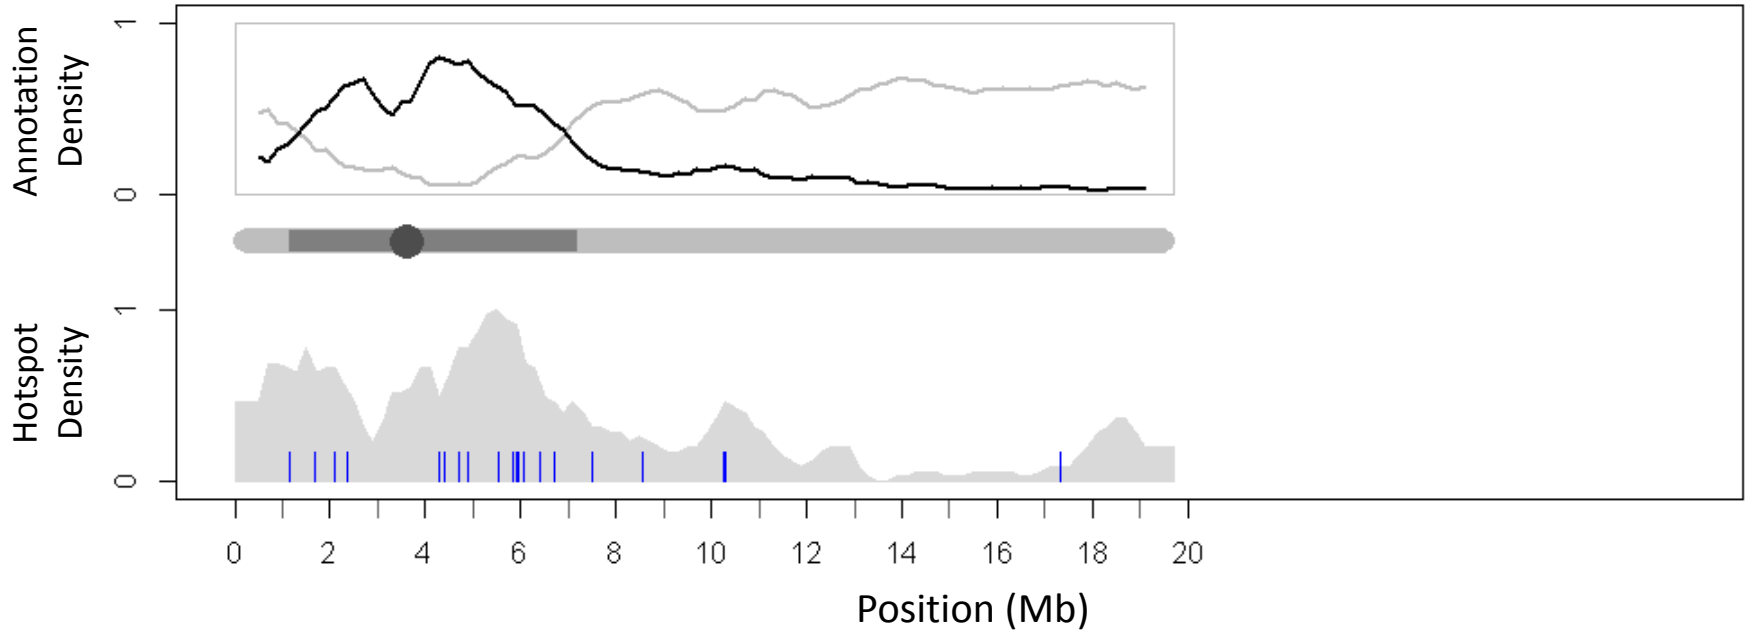

Figure S14-3

### Hotspots Horton et al. | chr 3

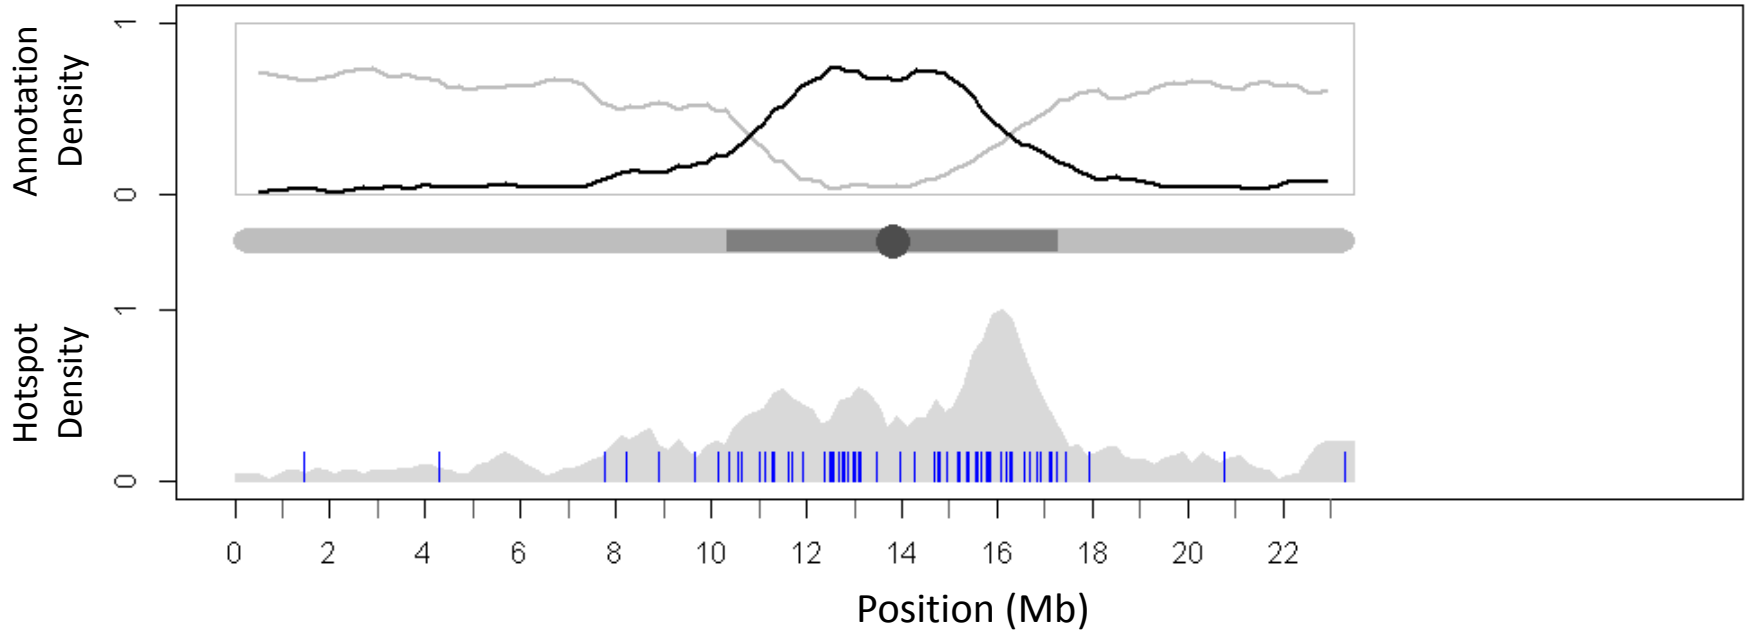

### Hotspots Horton et al. | chr 4

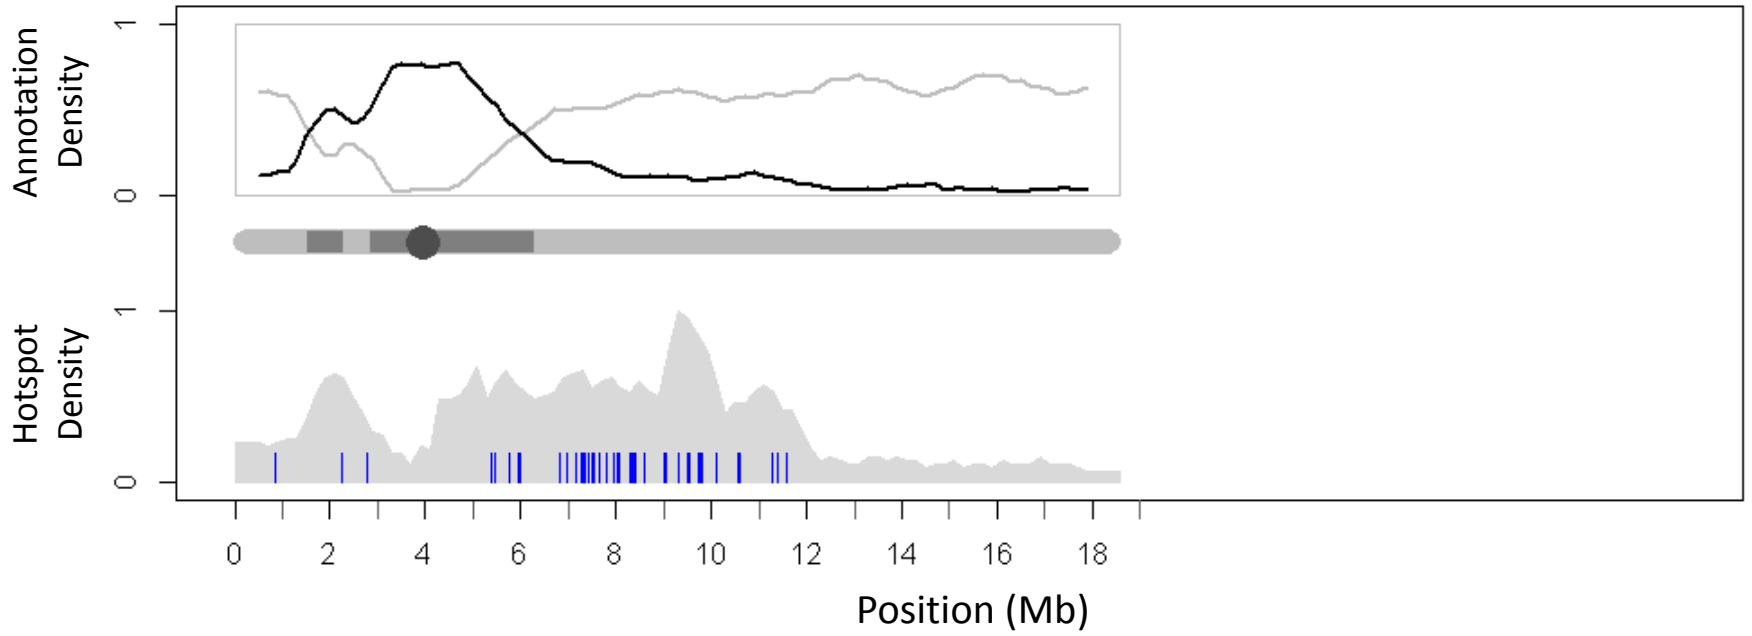

### Hotspots Horton et al. | chr 5

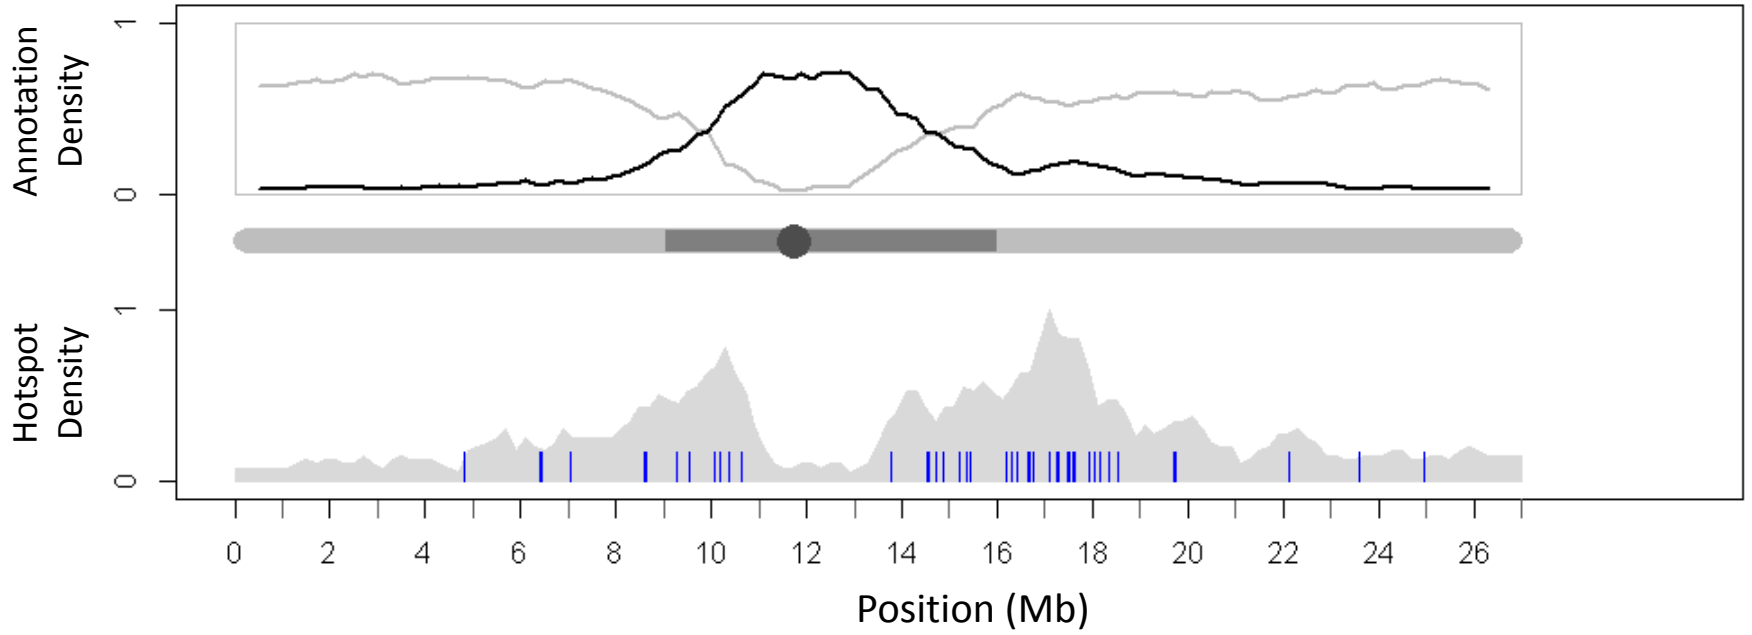



### Recombination intensity around transition

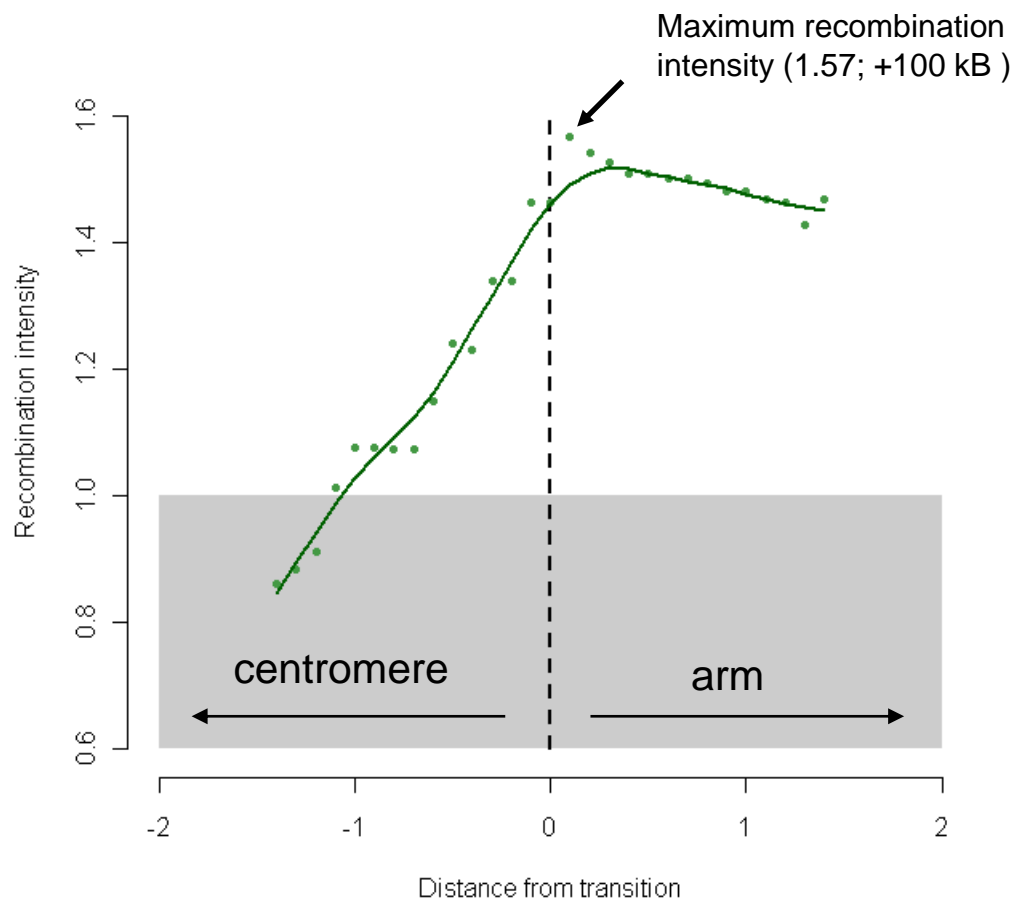

Figure S16

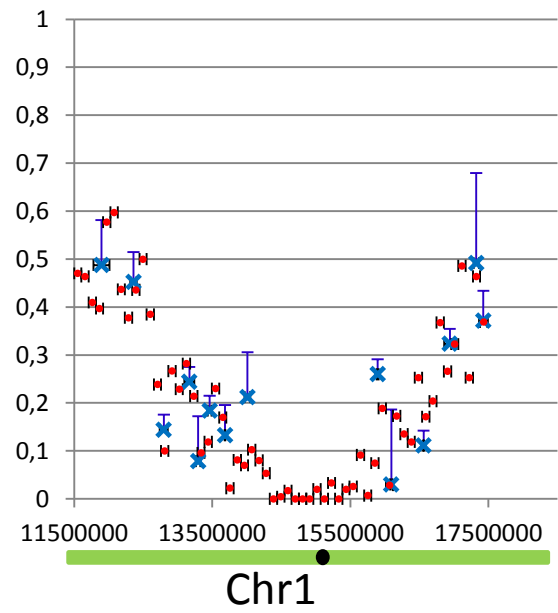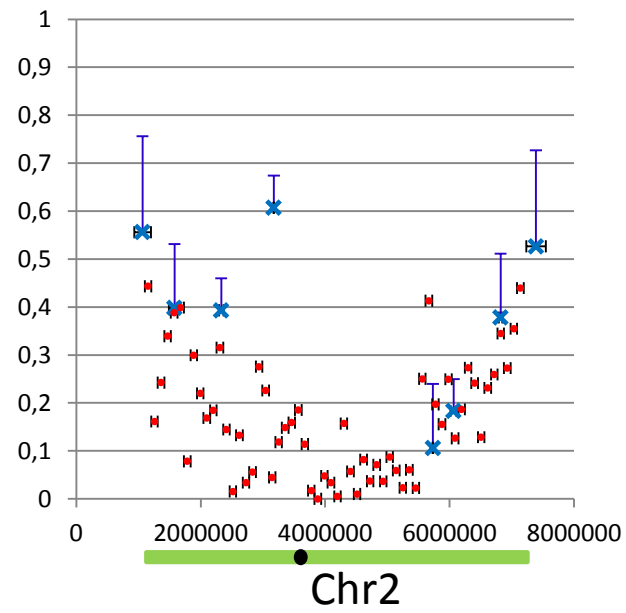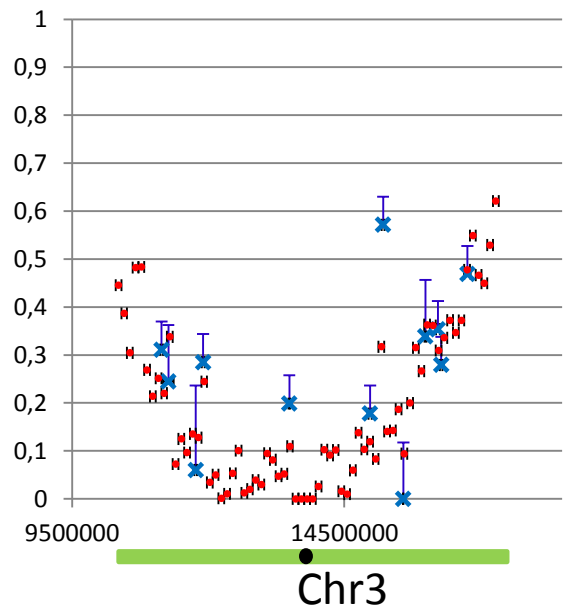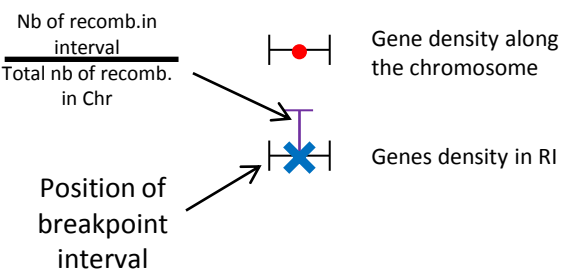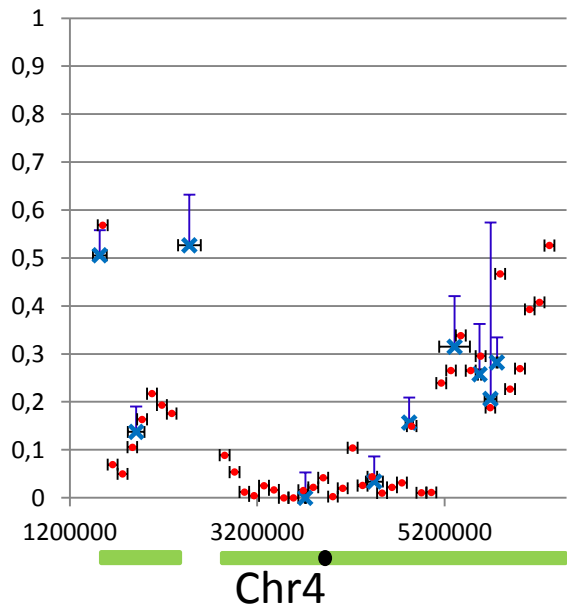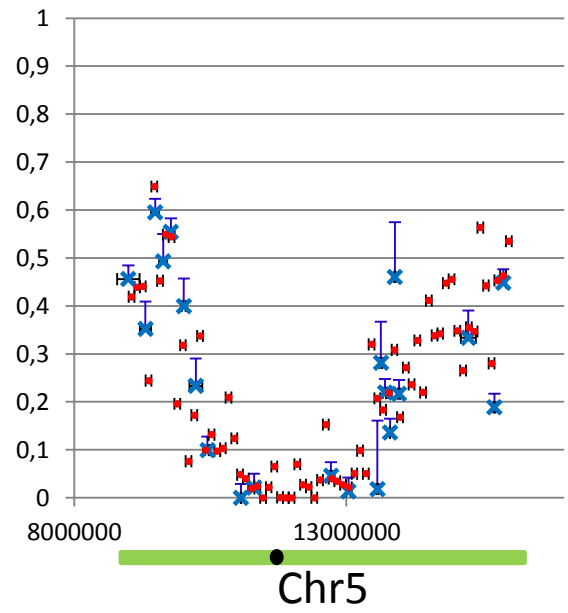

Figure S17

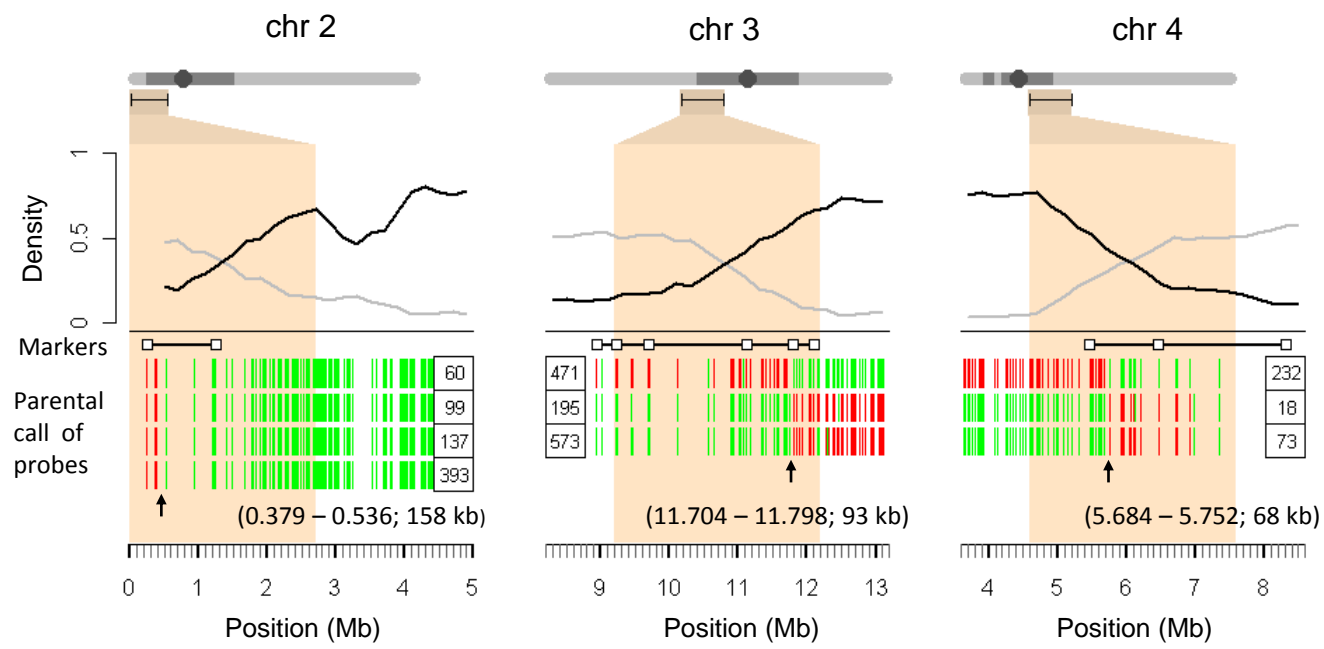

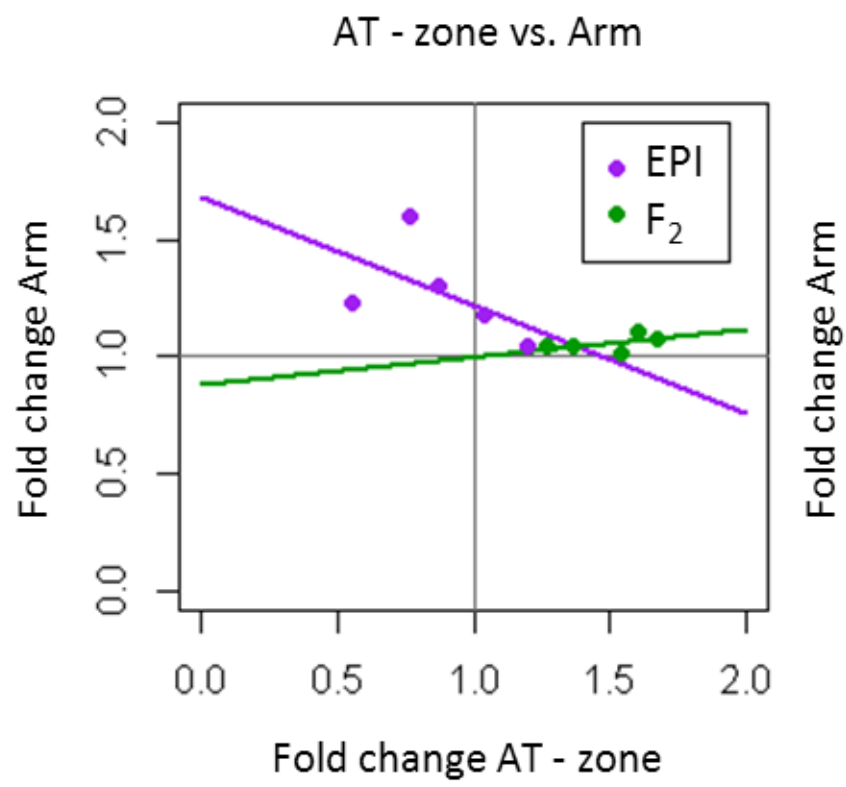

**Table S1**

|            | R60   | R98   | R202  | R260  | R344  | R480  |
|------------|-------|-------|-------|-------|-------|-------|
| % Overlap  | 87.97 | 87.20 | 86.56 | 86.66 | 86.06 | 81.00 |
| % U probes | 98.23 | 97.77 | 97.53 | 97.79 | 98.15 | 95.37 |
| % I probes | 9.37  | 16.34 | 19.07 | 12.45 | 9.91  | 28.11 |
| % M probes | 83.91 | 78.53 | 80.83 | 86.14 | 81.21 | 73.30 |

**Table S2**

| dmr_id | chromosome | start_bp | stop_bp  |
|--------|------------|----------|----------|
| DMR-1  | 1          | 525857   | 526242   |
| DMR-2  | 1          | 4145856  | 4146121  |
| DMR-3  | 1          | 4330606  | 4332076  |
| DMR-4  | 1          | 5098227  | 5098853  |
| DMR-5  | 1          | 5353427  | 5354443  |
| DMR-6  | 1          | 5691687  | 5695344  |
| DMR-7  | 1          | 5893659  | 5893999  |
| DMR-8  | 1          | 5913461  | 5915811  |
| DMR-9  | 1          | 6010663  | 6013983  |
| DMR-10 | 1          | 6156483  | 6158964  |
| DMR-11 | 1          | 6302732  | 6303012  |
| DMR-12 | 1          | 7073762  | 7074092  |
| DMR-13 | 1          | 7254722  | 7257249  |
| DMR-14 | 1          | 7430002  | 7432267  |
| DMR-15 | 1          | 7745823  | 7748073  |
| DMR-16 | 1          | 8159758  | 8160748  |
| DMR-17 | 1          | 8453446  | 8453821  |
| DMR-18 | 1          | 8456761  | 8459067  |
| DMR-19 | 1          | 8461252  | 8461915  |
| DMR-20 | 1          | 8490901  | 8491751  |
| DMR-21 | 1          | 8779330  | 8780036  |
| DMR-22 | 1          | 8801988  | 8802650  |
| DMR-23 | 1          | 8816171  | 8816837  |
| DMR-24 | 1          | 8830699  | 8831320  |
| DMR-25 | 1          | 8931514  | 8932319  |
| DMR-26 | 1          | 9004728  | 9015770  |
| DMR-27 | 1          | 9018095  | 9018740  |
| DMR-28 | 1          | 9370023  | 9373488  |
| DMR-29 | 1          | 9464911  | 9465256  |
| DMR-30 | 1          | 9574179  | 9575333  |
| DMR-31 | 1          | 9585538  | 9585888  |
| DMR-32 | 1          | 9676596  | 9681110  |
| DMR-33 | 1          | 9682045  | 9691308  |
| DMR-34 | 1          | 9928550  | 9929215  |
| DMR-35 | 1          | 10007603 | 10007973 |
| DMR-36 | 1          | 10152819 | 10153458 |
| DMR-37 | 1          | 10154128 | 10156602 |
| DMR-38 | 1          | 10357405 | 10358870 |
| DMR-39 | 1          | 10545345 | 10545839 |
| DMR-40 | 1          | 10591542 | 10592022 |
| DMR-41 | 1          | 10602467 | 10602964 |
| DMR-42 | 1          | 10745827 | 10746132 |
| DMR-43 | 1          | 10930125 | 10930458 |

|        |   |          |          |
|--------|---|----------|----------|
| DMR-44 | 1 | 11044649 | 11045616 |
| DMR-45 | 1 | 11047114 | 11051415 |
| DMR-46 | 1 | 11089513 | 11090028 |
| DMR-47 | 1 | 11096911 | 11100708 |
| DMR-48 | 1 | 11102419 | 11102716 |
| DMR-49 | 1 | 11148121 | 11152847 |
| DMR-50 | 1 | 11155054 | 11155344 |
| DMR-51 | 1 | 11301045 | 11301528 |
| DMR-52 | 1 | 11302214 | 11303059 |
| DMR-53 | 1 | 11305681 | 11306466 |
| DMR-54 | 1 | 11309661 | 11310311 |
| DMR-55 | 1 | 11322798 | 11324178 |
| DMR-56 | 1 | 11366246 | 11367244 |
| DMR-57 | 1 | 11502846 | 11503351 |
| DMR-58 | 1 | 11511756 | 11512571 |
| DMR-59 | 1 | 11517887 | 11518652 |
| DMR-60 | 1 | 11519343 | 11519828 |
| DMR-61 | 1 | 11752127 | 11754934 |
| DMR-62 | 1 | 11789416 | 11794100 |
| DMR-63 | 1 | 11984511 | 11984824 |
| DMR-64 | 1 | 11992096 | 11992401 |
| DMR-65 | 1 | 12018333 | 12019768 |
| DMR-66 | 1 | 12037760 | 12038430 |
| DMR-67 | 1 | 12176188 | 12176848 |
| DMR-68 | 1 | 12222214 | 12223049 |
| DMR-69 | 1 | 12273252 | 12276332 |
| DMR-70 | 1 | 12315004 | 12316774 |
| DMR-71 | 1 | 12403422 | 12409842 |
| DMR-72 | 1 | 12477035 | 12477365 |
| DMR-73 | 1 | 12568561 | 12569061 |
| DMR-74 | 1 | 12570419 | 12571041 |
| DMR-75 | 1 | 12591046 | 12591497 |
| DMR-76 | 1 | 12627186 | 12628276 |
| DMR-77 | 1 | 12631300 | 12632109 |
| DMR-78 | 1 | 12665781 | 12666246 |
| DMR-79 | 1 | 12667939 | 12671224 |
| DMR-80 | 1 | 12674514 | 12675189 |
| DMR-81 | 1 | 12691357 | 12691647 |
| DMR-82 | 1 | 12698951 | 12699226 |
| DMR-83 | 1 | 12699935 | 12701714 |
| DMR-84 | 1 | 12711641 | 12722880 |
| DMR-85 | 1 | 12724010 | 12728956 |
| DMR-86 | 1 | 12741147 | 12741472 |
| DMR-87 | 1 | 12753406 | 12760337 |
| DMR-88 | 1 | 12856990 | 12862085 |
| DMR-89 | 1 | 12886199 | 12886839 |
| DMR-90 | 1 | 12922989 | 12923311 |

|         |   |          |          |
|---------|---|----------|----------|
| DMR-91  | 1 | 12953326 | 12953821 |
| DMR-92  | 1 | 12987529 | 12987854 |
| DMR-93  | 1 | 12997426 | 13001226 |
| DMR-94  | 1 | 13003181 | 13008641 |
| DMR-95  | 1 | 13018502 | 13019187 |
| DMR-96  | 1 | 13021477 | 13023341 |
| DMR-97  | 1 | 13098250 | 13102655 |
| DMR-98  | 1 | 13139284 | 13140168 |
| DMR-99  | 1 | 13181421 | 13183006 |
| DMR-100 | 1 | 13183871 | 13186306 |
| DMR-101 | 1 | 13238644 | 13239154 |
| DMR-102 | 1 | 13239811 | 13242134 |
| DMR-103 | 1 | 13243578 | 13244443 |
| DMR-104 | 1 | 13245769 | 13246224 |
| DMR-105 | 1 | 13264736 | 13265031 |
| DMR-106 | 1 | 13292792 | 13293122 |
| DMR-107 | 1 | 13303473 | 13304498 |
| DMR-108 | 1 | 13311395 | 13313565 |
| DMR-109 | 1 | 13329072 | 13340087 |
| DMR-110 | 1 | 13340457 | 13340972 |
| DMR-111 | 1 | 13348682 | 13349007 |
| DMR-112 | 1 | 13354819 | 13355104 |
| DMR-113 | 1 | 13372768 | 13377246 |
| DMR-114 | 1 | 13377891 | 13380727 |
| DMR-115 | 1 | 13382192 | 13386947 |
| DMR-116 | 1 | 13391912 | 13397522 |
| DMR-117 | 1 | 13406151 | 13407751 |
| DMR-118 | 1 | 13410597 | 13416544 |
| DMR-119 | 1 | 13419144 | 13422650 |
| DMR-120 | 1 | 13427752 | 13429697 |
| DMR-121 | 1 | 13433353 | 13434184 |
| DMR-122 | 1 | 13435634 | 13436504 |
| DMR-123 | 1 | 13441785 | 13444705 |
| DMR-124 | 1 | 13447666 | 13448656 |
| DMR-125 | 1 | 13483008 | 13484797 |
| DMR-126 | 1 | 13486951 | 13488601 |
| DMR-127 | 1 | 13491291 | 13491906 |
| DMR-128 | 1 | 13499704 | 13500341 |
| DMR-129 | 1 | 13502344 | 13502970 |
| DMR-130 | 1 | 13505971 | 13507291 |
| DMR-131 | 1 | 13546183 | 13546503 |
| DMR-132 | 1 | 13561188 | 13566504 |
| DMR-133 | 1 | 13574775 | 13575380 |
| DMR-134 | 1 | 13575905 | 13578212 |
| DMR-135 | 1 | 13609050 | 13611740 |
| DMR-136 | 1 | 13614690 | 13616505 |
| DMR-137 | 1 | 13618483 | 13621742 |



|         |   |          |          |
|---------|---|----------|----------|
| DMR-138 | 1 | 13628014 | 13629692 |
| DMR-139 | 1 | 13680349 | 13682839 |
| DMR-140 | 1 | 13690605 | 13696354 |
| DMR-141 | 1 | 13711542 | 13711832 |
| DMR-142 | 1 | 13715007 | 13715657 |
| DMR-143 | 1 | 13719771 | 13720576 |
| DMR-144 | 1 | 13723276 | 13726066 |
| DMR-145 | 1 | 13730541 | 13731347 |
| DMR-146 | 1 | 13736274 | 13736584 |
| DMR-147 | 1 | 13745340 | 13746177 |
| DMR-148 | 1 | 13752141 | 13752791 |
| DMR-149 | 1 | 13755266 | 13756219 |
| DMR-150 | 1 | 13762371 | 13762816 |
| DMR-151 | 1 | 13767461 | 13767792 |
| DMR-152 | 1 | 13779346 | 13779696 |
| DMR-153 | 1 | 13780371 | 13780806 |
| DMR-154 | 1 | 13814841 | 13815321 |
| DMR-155 | 1 | 13815957 | 13817799 |
| DMR-156 | 1 | 13819638 | 13820442 |
| DMR-157 | 1 | 13826895 | 13828486 |
| DMR-158 | 1 | 13833771 | 13837234 |
| DMR-159 | 1 | 13844188 | 13848140 |
| DMR-160 | 1 | 13849806 | 13850281 |
| DMR-161 | 1 | 13859059 | 13859839 |
| DMR-162 | 1 | 13872096 | 13873549 |
| DMR-163 | 1 | 13874905 | 13878010 |
| DMR-164 | 1 | 13879195 | 13879640 |
| DMR-165 | 1 | 13924397 | 13925524 |
| DMR-166 | 1 | 13927386 | 13927651 |
| DMR-167 | 1 | 13931632 | 13932637 |
| DMR-168 | 1 | 13937767 | 13938707 |
| DMR-169 | 1 | 13949477 | 13950282 |
| DMR-170 | 1 | 13956862 | 13960687 |
| DMR-171 | 1 | 13964788 | 13965280 |
| DMR-172 | 1 | 13969593 | 13972424 |
| DMR-173 | 1 | 13976502 | 13977367 |
| DMR-174 | 1 | 13983607 | 13984268 |
| DMR-175 | 1 | 13984918 | 13985273 |
| DMR-176 | 1 | 13986093 | 13986393 |
| DMR-177 | 1 | 13988207 | 13989704 |
| DMR-178 | 1 | 13990239 | 13990519 |
| DMR-179 | 1 | 13997825 | 13998275 |
| DMR-180 | 1 | 14000766 | 14001618 |
| DMR-181 | 1 | 14021704 | 14022069 |
| DMR-182 | 1 | 14037747 | 14039365 |
| DMR-183 | 1 | 14039913 | 14040404 |
| DMR-184 | 1 | 14041565 | 14044311 |

|         |   |          |          |
|---------|---|----------|----------|
| DMR-185 | 1 | 14050129 | 14050964 |
| DMR-186 | 1 | 14052579 | 14054259 |
| DMR-187 | 1 | 14055047 | 14061305 |
| DMR-188 | 1 | 14063657 | 14066620 |
| DMR-189 | 1 | 14066965 | 14070057 |
| DMR-190 | 1 | 14077334 | 14077690 |
| DMR-191 | 1 | 14083297 | 14084617 |
| DMR-192 | 1 | 14099117 | 14099611 |
| DMR-193 | 1 | 14103543 | 14104753 |
| DMR-194 | 1 | 14112958 | 14119383 |
| DMR-195 | 1 | 14131943 | 14137208 |
| DMR-196 | 1 | 14139558 | 14141023 |
| DMR-197 | 1 | 14146506 | 14147761 |
| DMR-198 | 1 | 14189208 | 14189839 |
| DMR-199 | 1 | 14190383 | 14191339 |
| DMR-200 | 1 | 14197654 | 14198638 |
| DMR-201 | 1 | 14220243 | 14222676 |
| DMR-202 | 1 | 14302730 | 14306046 |
| DMR-203 | 1 | 14326954 | 14327284 |
| DMR-204 | 1 | 14335079 | 14335886 |
| DMR-205 | 1 | 14347579 | 14349784 |
| DMR-206 | 1 | 14353688 | 14355518 |
| DMR-207 | 1 | 14362323 | 14362593 |
| DMR-208 | 1 | 14372715 | 14374834 |
| DMR-209 | 1 | 14393152 | 14394827 |
| DMR-210 | 1 | 14399266 | 14401046 |
| DMR-211 | 1 | 14407851 | 14408131 |
| DMR-212 | 1 | 14418868 | 14420507 |
| DMR-213 | 1 | 14449277 | 14449602 |
| DMR-214 | 1 | 14460170 | 14462150 |
| DMR-215 | 1 | 14464620 | 14465570 |
| DMR-216 | 1 | 14472698 | 14473024 |
| DMR-217 | 1 | 14513578 | 14514098 |
| DMR-218 | 1 | 14541178 | 14545088 |
| DMR-219 | 1 | 14819493 | 14820677 |
| DMR-220 | 1 | 14842923 | 14845383 |
| DMR-221 | 1 | 14848035 | 14849200 |
| DMR-222 | 1 | 14878434 | 14879599 |
| DMR-223 | 1 | 14882406 | 14884716 |
| DMR-224 | 1 | 14896905 | 14899681 |
| DMR-225 | 1 | 15003185 | 15009456 |
| DMR-226 | 1 | 15142085 | 15142725 |
| DMR-227 | 1 | 15152615 | 15153335 |
| DMR-228 | 1 | 15154819 | 15157109 |
| DMR-229 | 1 | 15164718 | 15165353 |
| DMR-230 | 1 | 15165828 | 15168298 |
| DMR-231 | 1 | 15219602 | 15223099 |

|         |   |          |          |
|---------|---|----------|----------|
| DMR-232 | 1 | 15243886 | 15246170 |
| DMR-233 | 1 | 15284161 | 15284806 |
| DMR-234 | 1 | 15285451 | 15288751 |
| DMR-235 | 1 | 15290116 | 15290735 |
| DMR-236 | 1 | 15305127 | 15307087 |
| DMR-237 | 1 | 15308042 | 15308542 |
| DMR-238 | 1 | 15309072 | 15309419 |
| DMR-239 | 1 | 15315689 | 15318775 |
| DMR-240 | 1 | 15340915 | 15343024 |
| DMR-241 | 1 | 15382315 | 15383010 |
| DMR-242 | 1 | 15383660 | 15386750 |
| DMR-243 | 1 | 15388250 | 15388769 |
| DMR-244 | 1 | 15403289 | 15404904 |
| DMR-245 | 1 | 15406219 | 15406584 |
| DMR-246 | 1 | 15407209 | 15407571 |
| DMR-247 | 1 | 15440759 | 15445345 |
| DMR-248 | 1 | 15446035 | 15446975 |
| DMR-249 | 1 | 15513196 | 15513631 |
| DMR-250 | 1 | 15522224 | 15525362 |
| DMR-251 | 1 | 15528192 | 15531620 |
| DMR-252 | 1 | 15550286 | 15550766 |
| DMR-253 | 1 | 15551291 | 15552086 |
| DMR-254 | 1 | 15577694 | 15578529 |
| DMR-255 | 1 | 15582994 | 15587070 |
| DMR-256 | 1 | 15593660 | 15594495 |
| DMR-257 | 1 | 15620432 | 15625706 |
| DMR-258 | 1 | 15628145 | 15632000 |
| DMR-259 | 1 | 15635301 | 15636893 |
| DMR-260 | 1 | 15647454 | 15648484 |
| DMR-261 | 1 | 15689530 | 15690065 |
| DMR-262 | 1 | 15748293 | 15748923 |
| DMR-263 | 1 | 15759657 | 15762012 |
| DMR-264 | 1 | 15769894 | 15772746 |
| DMR-265 | 1 | 15779308 | 15779644 |
| DMR-266 | 1 | 15782808 | 15784123 |
| DMR-267 | 1 | 15800451 | 15800900 |
| DMR-268 | 1 | 15815259 | 15817608 |
| DMR-269 | 1 | 15821251 | 15822576 |
| DMR-270 | 1 | 15870396 | 15872217 |
| DMR-271 | 1 | 15874382 | 15874697 |
| DMR-272 | 1 | 15881127 | 15881601 |
| DMR-273 | 1 | 15911298 | 15911993 |
| DMR-274 | 1 | 15946135 | 15947260 |
| DMR-275 | 1 | 15952423 | 15953198 |
| DMR-276 | 1 | 15955564 | 15956344 |
| DMR-277 | 1 | 15974046 | 15974863 |
| DMR-278 | 1 | 15987243 | 15987706 |

|         |   |          |          |
|---------|---|----------|----------|
| DMR-279 | 1 | 15994140 | 15994835 |
| DMR-280 | 1 | 15998574 | 15999264 |
| DMR-281 | 1 | 16004875 | 16005860 |
| DMR-282 | 1 | 16011660 | 16012459 |
| DMR-283 | 1 | 16042016 | 16046253 |
| DMR-284 | 1 | 16055053 | 16055378 |
| DMR-285 | 1 | 16056198 | 16058308 |
| DMR-286 | 1 | 16058654 | 16061269 |
| DMR-287 | 1 | 16065722 | 16066417 |
| DMR-288 | 1 | 16073021 | 16075146 |
| DMR-289 | 1 | 16077497 | 16079431 |
| DMR-290 | 1 | 16098889 | 16101755 |
| DMR-291 | 1 | 16109836 | 16111806 |
| DMR-292 | 1 | 16120838 | 16124817 |
| DMR-293 | 1 | 16125493 | 16125788 |
| DMR-294 | 1 | 16174023 | 16174303 |
| DMR-295 | 1 | 16174849 | 16176279 |
| DMR-296 | 1 | 16179459 | 16183728 |
| DMR-297 | 1 | 16188329 | 16189474 |
| DMR-298 | 1 | 16194477 | 16195744 |
| DMR-299 | 1 | 16197618 | 16198273 |
| DMR-300 | 1 | 16209336 | 16213457 |
| DMR-301 | 1 | 16216220 | 16217715 |
| DMR-302 | 1 | 16219891 | 16221036 |
| DMR-303 | 1 | 16223133 | 16224143 |
| DMR-304 | 1 | 16226442 | 16227752 |
| DMR-305 | 1 | 16229783 | 16230098 |
| DMR-306 | 1 | 16241631 | 16242456 |
| DMR-307 | 1 | 16252521 | 16253186 |
| DMR-308 | 1 | 16283898 | 16285198 |
| DMR-309 | 1 | 16288200 | 16288860 |
| DMR-310 | 1 | 16292636 | 16292986 |
| DMR-311 | 1 | 16300039 | 16301513 |
| DMR-312 | 1 | 16321198 | 16321833 |
| DMR-313 | 1 | 16329784 | 16330219 |
| DMR-314 | 1 | 16331866 | 16337035 |
| DMR-315 | 1 | 16338796 | 16341818 |
| DMR-316 | 1 | 16367839 | 16368499 |
| DMR-317 | 1 | 16372020 | 16377961 |
| DMR-318 | 1 | 16378251 | 16379910 |
| DMR-319 | 1 | 16393296 | 16393971 |
| DMR-320 | 1 | 16406777 | 16409124 |
| DMR-321 | 1 | 16425107 | 16425602 |
| DMR-322 | 1 | 16451532 | 16452325 |
| DMR-323 | 1 | 16454831 | 16455121 |
| DMR-324 | 1 | 16492119 | 16494454 |
| DMR-325 | 1 | 16503303 | 16510446 |

|         |   |          |          |
|---------|---|----------|----------|
| DMR-326 | 1 | 16532567 | 16536974 |
| DMR-327 | 1 | 16554298 | 16559608 |
| DMR-328 | 1 | 16567689 | 16568185 |
| DMR-329 | 1 | 16571345 | 16577420 |
| DMR-330 | 1 | 16583872 | 16585347 |
| DMR-331 | 1 | 16605662 | 16606482 |
| DMR-332 | 1 | 16610222 | 16612082 |
| DMR-333 | 1 | 16614871 | 16615176 |
| DMR-334 | 1 | 16662920 | 16665717 |
| DMR-335 | 1 | 16676929 | 16678204 |
| DMR-336 | 1 | 16680244 | 16684809 |
| DMR-337 | 1 | 16695209 | 16700209 |
| DMR-338 | 1 | 16713569 | 16713884 |
| DMR-339 | 1 | 16718975 | 16720795 |
| DMR-340 | 1 | 16727043 | 16732876 |
| DMR-341 | 1 | 16733536 | 16733986 |
| DMR-342 | 1 | 16734832 | 16739267 |
| DMR-343 | 1 | 16745085 | 16745530 |
| DMR-344 | 1 | 16748385 | 16748665 |
| DMR-345 | 1 | 16757075 | 16757410 |
| DMR-346 | 1 | 16809934 | 16810420 |
| DMR-347 | 1 | 16844050 | 16845568 |
| DMR-348 | 1 | 16848979 | 16849677 |
| DMR-349 | 1 | 16855805 | 16857585 |
| DMR-350 | 1 | 16858275 | 16860405 |
| DMR-351 | 1 | 16861208 | 16861524 |
| DMR-352 | 1 | 16870325 | 16870805 |
| DMR-353 | 1 | 16883688 | 16884463 |
| DMR-354 | 1 | 16885141 | 16886116 |
| DMR-355 | 1 | 17025691 | 17031861 |
| DMR-356 | 1 | 17037470 | 17038124 |
| DMR-357 | 1 | 17039259 | 17052316 |
| DMR-358 | 1 | 17106923 | 17107383 |
| DMR-359 | 1 | 17184427 | 17184752 |
| DMR-360 | 1 | 17206100 | 17208560 |
| DMR-361 | 1 | 17232970 | 17234090 |
| DMR-362 | 1 | 17242364 | 17243167 |
| DMR-363 | 1 | 17257708 | 17258178 |
| DMR-364 | 1 | 17258838 | 17264340 |
| DMR-365 | 1 | 17265653 | 17266923 |
| DMR-366 | 1 | 17284412 | 17285075 |
| DMR-367 | 1 | 17363118 | 17368434 |
| DMR-368 | 1 | 17450795 | 17451090 |
| DMR-369 | 1 | 17491702 | 17492657 |
| DMR-370 | 1 | 17523013 | 17526003 |
| DMR-371 | 1 | 17536099 | 17536719 |
| DMR-372 | 1 | 17543357 | 17543652 |

|         |   |          |          |
|---------|---|----------|----------|
| DMR-373 | 1 | 17546641 | 17547096 |
| DMR-374 | 1 | 17549782 | 17550257 |
| DMR-375 | 1 | 17624374 | 17624644 |
| DMR-376 | 1 | 17627467 | 17629817 |
| DMR-377 | 1 | 17671709 | 17675959 |
| DMR-378 | 1 | 17678326 | 17685879 |
| DMR-379 | 1 | 17824180 | 17824625 |
| DMR-380 | 1 | 18005691 | 18010925 |
| DMR-381 | 1 | 18093468 | 18093752 |
| DMR-382 | 1 | 18098191 | 18099679 |
| DMR-383 | 1 | 18166541 | 18168193 |
| DMR-384 | 1 | 18217549 | 18218148 |
| DMR-385 | 1 | 18232348 | 18232723 |
| DMR-386 | 1 | 18275136 | 18275794 |
| DMR-387 | 1 | 18510569 | 18510863 |
| DMR-388 | 1 | 18850321 | 18850821 |
| DMR-389 | 1 | 18910876 | 18911807 |
| DMR-390 | 1 | 18966470 | 18967584 |
| DMR-391 | 1 | 18968104 | 18968769 |
| DMR-392 | 1 | 18969287 | 18970411 |
| DMR-393 | 1 | 18971211 | 18972691 |
| DMR-394 | 1 | 19026209 | 19026524 |
| DMR-395 | 1 | 19027171 | 19027481 |
| DMR-396 | 1 | 19321236 | 19322201 |
| DMR-397 | 1 | 19340045 | 19343672 |
| DMR-398 | 1 | 19344617 | 19349263 |
| DMR-399 | 1 | 19376283 | 19376622 |
| DMR-400 | 1 | 19599419 | 19600065 |
| DMR-401 | 1 | 19602225 | 19603333 |
| DMR-402 | 1 | 19680428 | 19682370 |
| DMR-403 | 1 | 19683515 | 19684030 |
| DMR-404 | 1 | 19709973 | 19710245 |
| DMR-405 | 1 | 19912915 | 19913197 |
| DMR-406 | 1 | 20036792 | 20037443 |
| DMR-407 | 1 | 20088798 | 20093878 |
| DMR-408 | 1 | 20316625 | 20317155 |
| DMR-409 | 1 | 20319443 | 20320248 |
| DMR-410 | 1 | 20323573 | 20324233 |
| DMR-411 | 1 | 20337631 | 20338751 |
| DMR-412 | 1 | 20628519 | 20629294 |
| DMR-413 | 1 | 20687106 | 20689701 |
| DMR-414 | 1 | 20930450 | 20930960 |
| DMR-415 | 1 | 21022509 | 21022839 |
| DMR-416 | 1 | 21247900 | 21253007 |
| DMR-417 | 1 | 21288034 | 21288524 |
| DMR-418 | 1 | 21351066 | 21352716 |
| DMR-419 | 1 | 21354006 | 21354966 |

|         |   |          |          |
|---------|---|----------|----------|
| DMR-420 | 1 | 21393773 | 21395395 |
| DMR-421 | 1 | 21396092 | 21396592 |
| DMR-422 | 1 | 21457161 | 21459296 |
| DMR-423 | 1 | 21459776 | 21460452 |
| DMR-424 | 1 | 21634333 | 21634698 |
| DMR-425 | 1 | 21695576 | 21696186 |
| DMR-426 | 1 | 21750810 | 21758234 |
| DMR-427 | 1 | 21759069 | 21761386 |
| DMR-428 | 1 | 21779239 | 21780706 |
| DMR-429 | 1 | 21800299 | 21800659 |
| DMR-430 | 1 | 21801669 | 21802299 |
| DMR-431 | 1 | 21815497 | 21816819 |
| DMR-432 | 1 | 21837927 | 21838792 |
| DMR-433 | 1 | 21851635 | 21853262 |
| DMR-434 | 1 | 21961370 | 21961666 |
| DMR-435 | 1 | 22066299 | 22066950 |
| DMR-436 | 1 | 22104456 | 22106077 |
| DMR-437 | 1 | 22106752 | 22107377 |
| DMR-438 | 1 | 22118472 | 22118807 |
| DMR-439 | 1 | 22167103 | 22168133 |
| DMR-440 | 1 | 22234806 | 22236246 |
| DMR-441 | 1 | 22699760 | 22702905 |
| DMR-442 | 1 | 22783409 | 22783734 |
| DMR-443 | 1 | 23121950 | 23126900 |
| DMR-444 | 1 | 23144235 | 23144720 |
| DMR-445 | 1 | 23155970 | 23156822 |
| DMR-446 | 1 | 23333374 | 23333649 |
| DMR-447 | 1 | 23513865 | 23514160 |
| DMR-448 | 1 | 23570478 | 23572928 |
| DMR-449 | 1 | 24045514 | 24045970 |
| DMR-450 | 1 | 24275688 | 24276121 |
| DMR-451 | 1 | 24280311 | 24280761 |
| DMR-452 | 1 | 24354337 | 24357855 |
| DMR-453 | 1 | 24432541 | 24433101 |
| DMR-454 | 1 | 24458485 | 24458985 |
| DMR-455 | 1 | 24459659 | 24460449 |
| DMR-456 | 1 | 24609800 | 24610085 |
| DMR-457 | 1 | 24646941 | 24647261 |
| DMR-458 | 1 | 24670998 | 24671353 |
| DMR-459 | 1 | 25061359 | 25061734 |
| DMR-460 | 1 | 26200063 | 26200847 |
| DMR-461 | 1 | 26760223 | 26761023 |
| DMR-462 | 1 | 27070457 | 27071391 |
| DMR-463 | 1 | 28707900 | 28708696 |
| DMR-464 | 1 | 28969586 | 28970097 |
| DMR-465 | 1 | 28998776 | 28999419 |
| DMR-466 | 1 | 29382087 | 29382603 |

|         |   |          |          |
|---------|---|----------|----------|
| DMR-467 | 1 | 29385346 | 29385711 |
| DMR-468 | 1 | 29481415 | 29483540 |
| DMR-469 | 2 | 21659    | 22979    |
| DMR-470 | 2 | 25420    | 26945    |
| DMR-471 | 2 | 50017    | 50512    |
| DMR-472 | 2 | 53000    | 53493    |
| DMR-473 | 2 | 65042    | 66062    |
| DMR-474 | 2 | 245700   | 249332   |
| DMR-475 | 2 | 373127   | 378679   |
| DMR-476 | 2 | 531631   | 537604   |
| DMR-477 | 2 | 576205   | 576535   |
| DMR-478 | 2 | 639111   | 639386   |
| DMR-479 | 2 | 678363   | 678853   |
| DMR-480 | 2 | 721561   | 721884   |
| DMR-481 | 2 | 904535   | 905356   |
| DMR-482 | 2 | 925027   | 929979   |
| DMR-483 | 2 | 930664   | 930979   |
| DMR-484 | 2 | 963169   | 963436   |
| DMR-485 | 2 | 1196278  | 1196748  |
| DMR-486 | 2 | 1198126  | 1198622  |
| DMR-487 | 2 | 1199222  | 1204062  |
| DMR-488 | 2 | 1214740  | 1215580  |
| DMR-489 | 2 | 1217765  | 1220349  |
| DMR-490 | 2 | 1221499  | 1222489  |
| DMR-491 | 2 | 1226299  | 1226634  |
| DMR-492 | 2 | 1227799  | 1231951  |
| DMR-493 | 2 | 1246133  | 1246638  |
| DMR-494 | 2 | 1251574  | 1252848  |
| DMR-495 | 2 | 1267915  | 1268856  |
| DMR-496 | 2 | 1295597  | 1296262  |
| DMR-497 | 2 | 1305333  | 1306837  |
| DMR-498 | 2 | 1308157  | 1308462  |
| DMR-499 | 2 | 1312475  | 1313135  |
| DMR-500 | 2 | 1326824  | 1327598  |
| DMR-501 | 2 | 1330073  | 1330408  |
| DMR-502 | 2 | 1342327  | 1343977  |
| DMR-503 | 2 | 1345741  | 1346236  |
| DMR-504 | 2 | 1349600  | 1350075  |
| DMR-505 | 2 | 1352048  | 1352343  |
| DMR-506 | 2 | 1387172  | 1387692  |
| DMR-507 | 2 | 1401845  | 1402997  |
| DMR-508 | 2 | 1420825  | 1421650  |
| DMR-509 | 2 | 1434558  | 1435223  |
| DMR-510 | 2 | 1469377  | 1469822  |
| DMR-511 | 2 | 1485511  | 1488641  |
| DMR-512 | 2 | 1490016  | 1490456  |
| DMR-513 | 2 | 1505637  | 1506007  |



|         |   |         |         |
|---------|---|---------|---------|
| DMR-514 | 2 | 1508652 | 1510106 |
| DMR-515 | 2 | 1512106 | 1512456 |
| DMR-516 | 2 | 1549565 | 1551889 |
| DMR-517 | 2 | 1601884 | 1602316 |
| DMR-518 | 2 | 1606657 | 1607947 |
| DMR-519 | 2 | 1650532 | 1651672 |
| DMR-520 | 2 | 1665553 | 1668318 |
| DMR-521 | 2 | 1728091 | 1728591 |
| DMR-522 | 2 | 1740813 | 1741133 |
| DMR-523 | 2 | 1758406 | 1759278 |
| DMR-524 | 2 | 1761384 | 1763397 |
| DMR-525 | 2 | 1765892 | 1766192 |
| DMR-526 | 2 | 1772150 | 1772628 |
| DMR-527 | 2 | 1773473 | 1774760 |
| DMR-528 | 2 | 1781534 | 1782394 |
| DMR-529 | 2 | 1783524 | 1787124 |
| DMR-530 | 2 | 1798189 | 1798685 |
| DMR-531 | 2 | 1804778 | 1805118 |
| DMR-532 | 2 | 1810255 | 1811557 |
| DMR-533 | 2 | 1814183 | 1815673 |
| DMR-534 | 2 | 1816373 | 1817973 |
| DMR-535 | 2 | 1828697 | 1836838 |
| DMR-536 | 2 | 1840248 | 1840943 |
| DMR-537 | 2 | 1885678 | 1886283 |
| DMR-538 | 2 | 1906578 | 1912199 |
| DMR-539 | 2 | 1944372 | 1946238 |
| DMR-540 | 2 | 1949643 | 1953330 |
| DMR-541 | 2 | 1956620 | 1958940 |
| DMR-542 | 2 | 1968834 | 1969119 |
| DMR-543 | 2 | 1970651 | 1974556 |
| DMR-544 | 2 | 1989408 | 1989799 |
| DMR-545 | 2 | 1996055 | 2010863 |
| DMR-546 | 2 | 2019170 | 2019605 |
| DMR-547 | 2 | 2021747 | 2022427 |
| DMR-548 | 2 | 2024781 | 2025091 |
| DMR-549 | 2 | 2031037 | 2031871 |
| DMR-550 | 2 | 2036129 | 2041384 |
| DMR-551 | 2 | 2041761 | 2046373 |
| DMR-552 | 2 | 2047493 | 2054088 |
| DMR-553 | 2 | 2075543 | 2080503 |
| DMR-554 | 2 | 2089615 | 2092240 |
| DMR-555 | 2 | 2093085 | 2094872 |
| DMR-556 | 2 | 2098311 | 2101640 |
| DMR-557 | 2 | 2102270 | 2102605 |
| DMR-558 | 2 | 2103304 | 2104922 |
| DMR-559 | 2 | 2107257 | 2109372 |
| DMR-560 | 2 | 2130214 | 2130978 |

|         |   |         |         |
|---------|---|---------|---------|
| DMR-561 | 2 | 2133346 | 2134939 |
| DMR-562 | 2 | 2158380 | 2158700 |
| DMR-563 | 2 | 2162548 | 2163707 |
| DMR-564 | 2 | 2165972 | 2167117 |
| DMR-565 | 2 | 2168983 | 2170432 |
| DMR-566 | 2 | 2176518 | 2176853 |
| DMR-567 | 2 | 2205113 | 2206099 |
| DMR-568 | 2 | 2221580 | 2222586 |
| DMR-569 | 2 | 2263184 | 2264626 |
| DMR-570 | 2 | 2274197 | 2282139 |
| DMR-571 | 2 | 2293691 | 2295652 |
| DMR-572 | 2 | 2302422 | 2306737 |
| DMR-573 | 2 | 2311820 | 2312175 |
| DMR-574 | 2 | 2365305 | 2370917 |
| DMR-575 | 2 | 2373250 | 2373893 |
| DMR-576 | 2 | 2378013 | 2380298 |
| DMR-577 | 2 | 2382603 | 2384109 |
| DMR-578 | 2 | 2384915 | 2388386 |
| DMR-579 | 2 | 2390901 | 2395673 |
| DMR-580 | 2 | 2396463 | 2399270 |
| DMR-581 | 2 | 2410511 | 2410881 |
| DMR-582 | 2 | 2414809 | 2417754 |
| DMR-583 | 2 | 2419949 | 2420229 |
| DMR-584 | 2 | 2437115 | 2437760 |
| DMR-585 | 2 | 2440051 | 2441182 |
| DMR-586 | 2 | 2444174 | 2447627 |
| DMR-587 | 2 | 2475369 | 2483949 |
| DMR-588 | 2 | 2503921 | 2504271 |
| DMR-589 | 2 | 2512486 | 2513326 |
| DMR-590 | 2 | 2514499 | 2516255 |
| DMR-591 | 2 | 2517275 | 2518891 |
| DMR-592 | 2 | 2522902 | 2523372 |
| DMR-593 | 2 | 2526197 | 2529458 |
| DMR-594 | 2 | 2534900 | 2535230 |
| DMR-595 | 2 | 2536051 | 2537221 |
| DMR-596 | 2 | 2538418 | 2542172 |
| DMR-597 | 2 | 2562315 | 2562785 |
| DMR-598 | 2 | 2568290 | 2569725 |
| DMR-599 | 2 | 2570893 | 2572250 |
| DMR-600 | 2 | 2573865 | 2574690 |
| DMR-601 | 2 | 2594011 | 2597826 |
| DMR-602 | 2 | 2617748 | 2618258 |
| DMR-603 | 2 | 2625665 | 2627800 |
| DMR-604 | 2 | 2631790 | 2634105 |
| DMR-605 | 2 | 2635275 | 2635750 |
| DMR-606 | 2 | 2637571 | 2638023 |
| DMR-607 | 2 | 2638878 | 2639404 |

|         |   |         |         |
|---------|---|---------|---------|
| DMR-608 | 2 | 2640539 | 2647445 |
| DMR-609 | 2 | 2649242 | 2651942 |
| DMR-610 | 2 | 2660192 | 2662657 |
| DMR-611 | 2 | 2663597 | 2664147 |
| DMR-612 | 2 | 2665751 | 2667118 |
| DMR-613 | 2 | 2667773 | 2678628 |
| DMR-614 | 2 | 2685438 | 2687867 |
| DMR-615 | 2 | 2694995 | 2695794 |
| DMR-616 | 2 | 2701279 | 2703422 |
| DMR-617 | 2 | 2704358 | 2706366 |
| DMR-618 | 2 | 2709500 | 2711941 |
| DMR-619 | 2 | 2720089 | 2720364 |
| DMR-620 | 2 | 2724540 | 2727810 |
| DMR-621 | 2 | 2739723 | 2742328 |
| DMR-622 | 2 | 2747969 | 2754895 |
| DMR-623 | 2 | 2780469 | 2780914 |
| DMR-624 | 2 | 2781904 | 2785919 |
| DMR-625 | 2 | 2790525 | 2791671 |
| DMR-626 | 2 | 2793825 | 2798924 |
| DMR-627 | 2 | 2800772 | 2804200 |
| DMR-628 | 2 | 2810488 | 2812438 |
| DMR-629 | 2 | 2813088 | 2815069 |
| DMR-630 | 2 | 2815734 | 2818226 |
| DMR-631 | 2 | 2821172 | 2821557 |
| DMR-632 | 2 | 2834244 | 2836894 |
| DMR-633 | 2 | 2844963 | 2849723 |
| DMR-634 | 2 | 2873846 | 2876972 |
| DMR-635 | 2 | 2883554 | 2887211 |
| DMR-636 | 2 | 2902365 | 2906971 |
| DMR-637 | 2 | 2908131 | 2911267 |
| DMR-638 | 2 | 2913614 | 2914734 |
| DMR-639 | 2 | 2916439 | 2917749 |
| DMR-640 | 2 | 2932412 | 2934057 |
| DMR-641 | 2 | 2936732 | 2937882 |
| DMR-642 | 2 | 2941839 | 2942339 |
| DMR-643 | 2 | 2943664 | 2943969 |
| DMR-644 | 2 | 2949575 | 2949910 |
| DMR-645 | 2 | 2969042 | 2973142 |
| DMR-646 | 2 | 2995907 | 2997947 |
| DMR-647 | 2 | 3004829 | 3005335 |
| DMR-648 | 2 | 3010774 | 3012591 |
| DMR-649 | 2 | 3025667 | 3028583 |
| DMR-650 | 2 | 3029291 | 3039973 |
| DMR-651 | 2 | 3040627 | 3041959 |
| DMR-652 | 2 | 3044295 | 3045090 |
| DMR-653 | 2 | 3078261 | 3078746 |
| DMR-654 | 2 | 3107993 | 3109458 |

|         |   |         |         |
|---------|---|---------|---------|
| DMR-655 | 2 | 3111250 | 3112458 |
| DMR-656 | 2 | 3113911 | 3114603 |
| DMR-657 | 2 | 3124002 | 3126297 |
| DMR-658 | 2 | 3136549 | 3137209 |
| DMR-659 | 2 | 3148720 | 3149420 |
| DMR-660 | 2 | 3152664 | 3155154 |
| DMR-661 | 2 | 3158763 | 3159258 |
| DMR-662 | 2 | 3160083 | 3166217 |
| DMR-663 | 2 | 3171525 | 3173945 |
| DMR-664 | 2 | 3175617 | 3179447 |
| DMR-665 | 2 | 3198725 | 3200570 |
| DMR-666 | 2 | 3204341 | 3206116 |
| DMR-667 | 2 | 3213591 | 3215382 |
| DMR-668 | 2 | 3220524 | 3220809 |
| DMR-669 | 2 | 3224299 | 3225754 |
| DMR-670 | 2 | 3231426 | 3237483 |
| DMR-671 | 2 | 3258618 | 3259576 |
| DMR-672 | 2 | 3509906 | 3511411 |
| DMR-673 | 2 | 3511866 | 3512581 |
| DMR-674 | 2 | 3517313 | 3522464 |
| DMR-675 | 2 | 3575941 | 3577261 |
| DMR-676 | 2 | 3585513 | 3587605 |
| DMR-677 | 2 | 3588971 | 3589608 |
| DMR-678 | 2 | 3590616 | 3591760 |
| DMR-679 | 2 | 3593550 | 3594530 |
| DMR-680 | 2 | 3655625 | 3656786 |
| DMR-681 | 2 | 3658771 | 3659101 |
| DMR-682 | 2 | 3662570 | 3663515 |
| DMR-683 | 2 | 3665539 | 3667151 |
| DMR-684 | 2 | 3681026 | 3681503 |
| DMR-685 | 2 | 3694187 | 3699137 |
| DMR-686 | 2 | 3708543 | 3709532 |
| DMR-687 | 2 | 3710862 | 3712045 |
| DMR-688 | 2 | 3715177 | 3715697 |
| DMR-689 | 2 | 3717513 | 3719475 |
| DMR-690 | 2 | 3730709 | 3734122 |
| DMR-691 | 2 | 3751176 | 3753797 |
| DMR-692 | 2 | 3760229 | 3761179 |
| DMR-693 | 2 | 3762179 | 3763333 |
| DMR-694 | 2 | 3792071 | 3793211 |
| DMR-695 | 2 | 3796541 | 3797346 |
| DMR-696 | 2 | 3800181 | 3802306 |
| DMR-697 | 2 | 3806565 | 3806943 |
| DMR-698 | 2 | 3807762 | 3808546 |
| DMR-699 | 2 | 3809379 | 3810738 |
| DMR-700 | 2 | 3811670 | 3814515 |
| DMR-701 | 2 | 3826246 | 3826876 |

|         |   |         |         |
|---------|---|---------|---------|
| DMR-702 | 2 | 3896015 | 3899776 |
| DMR-703 | 2 | 3911334 | 3912049 |
| DMR-704 | 2 | 3915511 | 3915782 |
| DMR-705 | 2 | 3930500 | 3932810 |
| DMR-706 | 2 | 3943883 | 3945538 |
| DMR-707 | 2 | 3946163 | 3949501 |
| DMR-708 | 2 | 3950471 | 3951286 |
| DMR-709 | 2 | 3966794 | 3968787 |
| DMR-710 | 2 | 3985597 | 3986917 |
| DMR-711 | 2 | 4019793 | 4023584 |
| DMR-712 | 2 | 4024079 | 4025709 |
| DMR-713 | 2 | 4047681 | 4047996 |
| DMR-714 | 2 | 4050941 | 4051416 |
| DMR-715 | 2 | 4057224 | 4060549 |
| DMR-716 | 2 | 4064959 | 4066429 |
| DMR-717 | 2 | 4068137 | 4072757 |
| DMR-718 | 2 | 4073370 | 4074222 |
| DMR-719 | 2 | 4077151 | 4077694 |
| DMR-720 | 2 | 4096636 | 4098118 |
| DMR-721 | 2 | 4099158 | 4103448 |
| DMR-722 | 2 | 4117083 | 4127012 |
| DMR-723 | 2 | 4157341 | 4159712 |
| DMR-724 | 2 | 4207071 | 4209481 |
| DMR-725 | 2 | 4232776 | 4233119 |
| DMR-726 | 2 | 4233904 | 4243647 |
| DMR-727 | 2 | 4251452 | 4252084 |
| DMR-728 | 2 | 4253414 | 4253709 |
| DMR-729 | 2 | 4255076 | 4256068 |
| DMR-730 | 2 | 4258216 | 4260323 |
| DMR-731 | 2 | 4265789 | 4268889 |
| DMR-732 | 2 | 4274528 | 4275024 |
| DMR-733 | 2 | 4283957 | 4289392 |
| DMR-734 | 2 | 4300231 | 4301118 |
| DMR-735 | 2 | 4302395 | 4302875 |
| DMR-736 | 2 | 4315145 | 4315625 |
| DMR-737 | 2 | 4327684 | 4329273 |
| DMR-738 | 2 | 4330654 | 4332079 |
| DMR-739 | 2 | 4369562 | 4376666 |
| DMR-740 | 2 | 4390545 | 4393955 |
| DMR-741 | 2 | 4395965 | 4397775 |
| DMR-742 | 2 | 4413304 | 4414579 |
| DMR-743 | 2 | 4442801 | 4444172 |
| DMR-744 | 2 | 4447576 | 4448566 |
| DMR-745 | 2 | 4458850 | 4459959 |
| DMR-746 | 2 | 4466119 | 4467049 |
| DMR-747 | 2 | 4467379 | 4468559 |
| DMR-748 | 2 | 4475957 | 4477492 |

|         |   |         |         |
|---------|---|---------|---------|
| DMR-749 | 2 | 4480603 | 4481108 |
| DMR-750 | 2 | 4493012 | 4494987 |
| DMR-751 | 2 | 4508511 | 4509821 |
| DMR-752 | 2 | 4514581 | 4516262 |
| DMR-753 | 2 | 4557515 | 4560500 |
| DMR-754 | 2 | 4561444 | 4561983 |
| DMR-755 | 2 | 4562281 | 4563962 |
| DMR-756 | 2 | 4573697 | 4574192 |
| DMR-757 | 2 | 4580300 | 4581770 |
| DMR-758 | 2 | 4590359 | 4592466 |
| DMR-759 | 2 | 4630787 | 4633086 |
| DMR-760 | 2 | 4639696 | 4640135 |
| DMR-761 | 2 | 4642276 | 4643001 |
| DMR-762 | 2 | 4648274 | 4649875 |
| DMR-763 | 2 | 4651574 | 4656324 |
| DMR-764 | 2 | 4661457 | 4662777 |
| DMR-765 | 2 | 4667899 | 4669564 |
| DMR-766 | 2 | 4671171 | 4675645 |
| DMR-767 | 2 | 4676466 | 4678911 |
| DMR-768 | 2 | 4679751 | 4681281 |
| DMR-769 | 2 | 4683078 | 4685013 |
| DMR-770 | 2 | 4699863 | 4700193 |
| DMR-771 | 2 | 4707170 | 4710941 |
| DMR-772 | 2 | 4715743 | 4716393 |
| DMR-773 | 2 | 4731391 | 4733565 |
| DMR-774 | 2 | 4740293 | 4742159 |
| DMR-775 | 2 | 4746911 | 4747216 |
| DMR-776 | 2 | 4792295 | 4794449 |
| DMR-777 | 2 | 4798413 | 4799877 |
| DMR-778 | 2 | 4816409 | 4824622 |
| DMR-779 | 2 | 4825317 | 4828747 |
| DMR-780 | 2 | 4829117 | 4833409 |
| DMR-781 | 2 | 4837036 | 4838525 |
| DMR-782 | 2 | 4839164 | 4839464 |
| DMR-783 | 2 | 4840291 | 4840936 |
| DMR-784 | 2 | 4841817 | 4842447 |
| DMR-785 | 2 | 4842797 | 4844132 |
| DMR-786 | 2 | 4847592 | 4849862 |
| DMR-787 | 2 | 4865030 | 4866025 |
| DMR-788 | 2 | 4868225 | 4868702 |
| DMR-789 | 2 | 4869197 | 4869837 |
| DMR-790 | 2 | 4872152 | 4872809 |
| DMR-791 | 2 | 4875636 | 4876633 |
| DMR-792 | 2 | 4877735 | 4878448 |
| DMR-793 | 2 | 4880256 | 4882045 |
| DMR-794 | 2 | 4882870 | 4893593 |
| DMR-795 | 2 | 4894408 | 4895093 |

|         |   |         |         |
|---------|---|---------|---------|
| DMR-796 | 2 | 4901685 | 4905985 |
| DMR-797 | 2 | 4907777 | 4908435 |
| DMR-798 | 2 | 4911777 | 4912737 |
| DMR-799 | 2 | 4917349 | 4917889 |
| DMR-800 | 2 | 4926280 | 4927745 |
| DMR-801 | 2 | 4930711 | 4931211 |
| DMR-802 | 2 | 4948853 | 4949180 |
| DMR-803 | 2 | 4974484 | 4977779 |
| DMR-804 | 2 | 4978274 | 4979538 |
| DMR-805 | 2 | 4980067 | 4980867 |
| DMR-806 | 2 | 5001007 | 5001352 |
| DMR-807 | 2 | 5009416 | 5009936 |
| DMR-808 | 2 | 5022134 | 5023985 |
| DMR-809 | 2 | 5029060 | 5029595 |
| DMR-810 | 2 | 5031903 | 5034043 |
| DMR-811 | 2 | 5037008 | 5037822 |
| DMR-812 | 2 | 5041137 | 5044059 |
| DMR-813 | 2 | 5069490 | 5074931 |
| DMR-814 | 2 | 5081047 | 5081402 |
| DMR-815 | 2 | 5081732 | 5082012 |
| DMR-816 | 2 | 5082392 | 5082827 |
| DMR-817 | 2 | 5083677 | 5086973 |
| DMR-818 | 2 | 5097551 | 5099876 |
| DMR-819 | 2 | 5113058 | 5113414 |
| DMR-820 | 2 | 5128201 | 5130079 |
| DMR-821 | 2 | 5156299 | 5158583 |
| DMR-822 | 2 | 5178526 | 5179696 |
| DMR-823 | 2 | 5180836 | 5185459 |
| DMR-824 | 2 | 5188488 | 5188798 |
| DMR-825 | 2 | 5190125 | 5191893 |
| DMR-826 | 2 | 5224127 | 5225413 |
| DMR-827 | 2 | 5246735 | 5252667 |
| DMR-828 | 2 | 5287758 | 5288603 |
| DMR-829 | 2 | 5294867 | 5295382 |
| DMR-830 | 2 | 5296067 | 5298812 |
| DMR-831 | 2 | 5299866 | 5300320 |
| DMR-832 | 2 | 5300980 | 5302445 |
| DMR-833 | 2 | 5303949 | 5304949 |
| DMR-834 | 2 | 5305476 | 5306594 |
| DMR-835 | 2 | 5307779 | 5312901 |
| DMR-836 | 2 | 5313356 | 5313891 |
| DMR-837 | 2 | 5314331 | 5317026 |
| DMR-838 | 2 | 5319771 | 5320292 |
| DMR-839 | 2 | 5322108 | 5323078 |
| DMR-840 | 2 | 5324931 | 5326759 |
| DMR-841 | 2 | 5328402 | 5328687 |
| DMR-842 | 2 | 5331180 | 5333627 |

|         |   |         |         |
|---------|---|---------|---------|
| DMR-843 | 2 | 5335970 | 5336625 |
| DMR-844 | 2 | 5347055 | 5348028 |
| DMR-845 | 2 | 5388300 | 5392536 |
| DMR-846 | 2 | 5393698 | 5395343 |
| DMR-847 | 2 | 5411065 | 5413051 |
| DMR-848 | 2 | 5418788 | 5423063 |
| DMR-849 | 2 | 5448142 | 5449465 |
| DMR-850 | 2 | 5453121 | 5461071 |
| DMR-851 | 2 | 5463152 | 5463983 |
| DMR-852 | 2 | 5467337 | 5468494 |
| DMR-853 | 2 | 5469133 | 5470783 |
| DMR-854 | 2 | 5476711 | 5477371 |
| DMR-855 | 2 | 5477871 | 5478696 |
| DMR-856 | 2 | 5479201 | 5479856 |
| DMR-857 | 2 | 5480321 | 5480651 |
| DMR-858 | 2 | 5482668 | 5485614 |
| DMR-859 | 2 | 5486459 | 5491875 |
| DMR-860 | 2 | 5494371 | 5497859 |
| DMR-861 | 2 | 5503799 | 5505724 |
| DMR-862 | 2 | 5524264 | 5526363 |
| DMR-863 | 2 | 5533166 | 5534486 |
| DMR-864 | 2 | 5544374 | 5544679 |
| DMR-865 | 2 | 5588058 | 5588943 |
| DMR-866 | 2 | 5607898 | 5608853 |
| DMR-867 | 2 | 5609728 | 5612998 |
| DMR-868 | 2 | 5620955 | 5638234 |
| DMR-869 | 2 | 5672931 | 5675838 |
| DMR-870 | 2 | 5717424 | 5723216 |
| DMR-871 | 2 | 5724071 | 5724695 |
| DMR-872 | 2 | 5725548 | 5726670 |
| DMR-873 | 2 | 5730013 | 5730467 |
| DMR-874 | 2 | 5731670 | 5732105 |
| DMR-875 | 2 | 5737238 | 5738103 |
| DMR-876 | 2 | 5781463 | 5781937 |
| DMR-877 | 2 | 5784628 | 5785619 |
| DMR-878 | 2 | 5799639 | 5804892 |
| DMR-879 | 2 | 5822403 | 5823023 |
| DMR-880 | 2 | 5823703 | 5824399 |
| DMR-881 | 2 | 5825509 | 5826979 |
| DMR-882 | 2 | 5828689 | 5829154 |
| DMR-883 | 2 | 5833146 | 5834416 |
| DMR-884 | 2 | 5836440 | 5837900 |
| DMR-885 | 2 | 5853244 | 5858829 |
| DMR-886 | 2 | 5859874 | 5864604 |
| DMR-887 | 2 | 5885224 | 5886049 |
| DMR-888 | 2 | 5887429 | 5889404 |
| DMR-889 | 2 | 5903091 | 5905071 |



|         |   |         |         |
|---------|---|---------|---------|
| DMR-890 | 2 | 5907512 | 5908713 |
| DMR-891 | 2 | 5952108 | 5953203 |
| DMR-892 | 2 | 5954252 | 5955362 |
| DMR-893 | 2 | 6016231 | 6020356 |
| DMR-894 | 2 | 6036569 | 6038344 |
| DMR-895 | 2 | 6068765 | 6072694 |
| DMR-896 | 2 | 6079939 | 6082789 |
| DMR-897 | 2 | 6084244 | 6085367 |
| DMR-898 | 2 | 6088718 | 6089886 |
| DMR-899 | 2 | 6098739 | 6099889 |
| DMR-900 | 2 | 6101372 | 6105228 |
| DMR-901 | 2 | 6112653 | 6114906 |
| DMR-902 | 2 | 6116421 | 6119529 |
| DMR-903 | 2 | 6123025 | 6126954 |
| DMR-904 | 2 | 6128280 | 6129447 |
| DMR-905 | 2 | 6132727 | 6134918 |
| DMR-906 | 2 | 6141480 | 6146148 |
| DMR-907 | 2 | 6156813 | 6159798 |
| DMR-908 | 2 | 6165904 | 6169694 |
| DMR-909 | 2 | 6201229 | 6201754 |
| DMR-910 | 2 | 6204002 | 6206334 |
| DMR-911 | 2 | 6263910 | 6268205 |
| DMR-912 | 2 | 6336693 | 6341318 |
| DMR-913 | 2 | 6342498 | 6352006 |
| DMR-914 | 2 | 6356024 | 6356689 |
| DMR-915 | 2 | 6358149 | 6360646 |
| DMR-916 | 2 | 6379786 | 6380400 |
| DMR-917 | 2 | 6384215 | 6384680 |
| DMR-918 | 2 | 6386213 | 6386693 |
| DMR-919 | 2 | 6427640 | 6434345 |
| DMR-920 | 2 | 6440446 | 6447922 |
| DMR-921 | 2 | 6454345 | 6456350 |
| DMR-922 | 2 | 6468890 | 6470820 |
| DMR-923 | 2 | 6472662 | 6473668 |
| DMR-924 | 2 | 6481756 | 6485377 |
| DMR-925 | 2 | 6497412 | 6497752 |
| DMR-926 | 2 | 6515230 | 6515876 |
| DMR-927 | 2 | 6531258 | 6531583 |
| DMR-928 | 2 | 6536026 | 6538326 |
| DMR-929 | 2 | 6539511 | 6540121 |
| DMR-930 | 2 | 6557162 | 6558127 |
| DMR-931 | 2 | 6560592 | 6561729 |
| DMR-932 | 2 | 6562407 | 6565398 |
| DMR-933 | 2 | 6566883 | 6567663 |
| DMR-934 | 2 | 6587142 | 6589792 |
| DMR-935 | 2 | 6595097 | 6598396 |
| DMR-936 | 2 | 6631522 | 6633512 |

|         |   |         |         |
|---------|---|---------|---------|
| DMR-937 | 2 | 6654516 | 6655011 |
| DMR-938 | 2 | 6693942 | 6694279 |
| DMR-939 | 2 | 6707645 | 6713853 |
| DMR-940 | 2 | 6726895 | 6727440 |
| DMR-941 | 2 | 6743447 | 6743923 |
| DMR-942 | 2 | 6774793 | 6779739 |
| DMR-943 | 2 | 6787490 | 6788605 |
| DMR-944 | 2 | 6790136 | 6793881 |
| DMR-945 | 2 | 6849039 | 6849668 |
| DMR-946 | 2 | 6851311 | 6853826 |
| DMR-947 | 2 | 6866817 | 6867332 |
| DMR-948 | 2 | 6918509 | 6921589 |
| DMR-949 | 2 | 6942754 | 6946037 |
| DMR-950 | 2 | 6961080 | 6965815 |
| DMR-951 | 2 | 6969126 | 6969961 |
| DMR-952 | 2 | 6971106 | 6973066 |
| DMR-953 | 2 | 6973906 | 6974221 |
| DMR-954 | 2 | 6974945 | 6975215 |
| DMR-955 | 2 | 6976261 | 6977253 |
| DMR-956 | 2 | 7012361 | 7016029 |
| DMR-957 | 2 | 7018169 | 7026864 |
| DMR-958 | 2 | 7073716 | 7078043 |
| DMR-959 | 2 | 7120145 | 7121430 |
| DMR-960 | 2 | 7122775 | 7123116 |
| DMR-961 | 2 | 7178018 | 7178714 |
| DMR-962 | 2 | 7231001 | 7231331 |
| DMR-963 | 2 | 7232302 | 7232947 |
| DMR-964 | 2 | 7233467 | 7236245 |
| DMR-965 | 2 | 7239770 | 7245205 |
| DMR-966 | 2 | 7296509 | 7301759 |
| DMR-967 | 2 | 7306715 | 7307045 |
| DMR-968 | 2 | 7388394 | 7388762 |
| DMR-969 | 2 | 7455569 | 7459679 |
| DMR-970 | 2 | 7460204 | 7461136 |
| DMR-971 | 2 | 7463815 | 7464135 |
| DMR-972 | 2 | 7534626 | 7534956 |
| DMR-973 | 2 | 7544676 | 7545673 |
| DMR-974 | 2 | 7588396 | 7591055 |
| DMR-975 | 2 | 7784246 | 7791011 |
| DMR-976 | 2 | 7886836 | 7887560 |
| DMR-977 | 2 | 7913071 | 7913566 |
| DMR-978 | 2 | 8023509 | 8025602 |
| DMR-979 | 2 | 8081908 | 8082197 |
| DMR-980 | 2 | 8278256 | 8281520 |
| DMR-981 | 2 | 8420801 | 8421331 |
| DMR-982 | 2 | 8568345 | 8571152 |
| DMR-983 | 2 | 8572927 | 8574117 |

|          |   |          |          |
|----------|---|----------|----------|
| DMR-984  | 2 | 8597720  | 8598489  |
| DMR-985  | 2 | 8824215  | 8827670  |
| DMR-986  | 2 | 8881486  | 8882476  |
| DMR-987  | 2 | 9129123  | 9130835  |
| DMR-988  | 2 | 9194501  | 9198421  |
| DMR-989  | 2 | 9200785  | 9202235  |
| DMR-990  | 2 | 9335929  | 9336730  |
| DMR-991  | 2 | 9659660  | 9659972  |
| DMR-992  | 2 | 10012063 | 10013577 |
| DMR-993  | 2 | 10016045 | 10016720 |
| DMR-994  | 2 | 10092568 | 10093879 |
| DMR-995  | 2 | 10095423 | 10097405 |
| DMR-996  | 2 | 10100201 | 10100677 |
| DMR-997  | 2 | 10239261 | 10240293 |
| DMR-998  | 2 | 10415627 | 10417647 |
| DMR-999  | 2 | 10540595 | 10541195 |
| DMR-1000 | 2 | 10643868 | 10644152 |
| DMR-1001 | 2 | 10646519 | 10646834 |
| DMR-1002 | 2 | 10647639 | 10649269 |
| DMR-1003 | 2 | 10655591 | 10656693 |
| DMR-1004 | 2 | 10881649 | 10882279 |
| DMR-1005 | 2 | 12456566 | 12461464 |
| DMR-1006 | 2 | 12546664 | 12548799 |
| DMR-1007 | 2 | 12664247 | 12665092 |
| DMR-1008 | 2 | 12743505 | 12743777 |
| DMR-1009 | 2 | 12893657 | 12894147 |
| DMR-1010 | 2 | 13167389 | 13167885 |
| DMR-1011 | 2 | 14414952 | 14415277 |
| DMR-1012 | 2 | 14415602 | 14417057 |
| DMR-1013 | 2 | 14419077 | 14419557 |
| DMR-1014 | 2 | 14560785 | 14561251 |
| DMR-1015 | 2 | 15418592 | 15418927 |
| DMR-1016 | 2 | 16028930 | 16029320 |
| DMR-1017 | 2 | 16098739 | 16099054 |
| DMR-1018 | 2 | 16897371 | 16897656 |
| DMR-1019 | 2 | 17099658 | 17102643 |
| DMR-1020 | 2 | 19381131 | 19381454 |
| DMR-1021 | 3 | 129256   | 129877   |
| DMR-1022 | 3 | 557729   | 558034   |
| DMR-1023 | 3 | 1075371  | 1075802  |
| DMR-1024 | 3 | 1963715  | 1966177  |
| DMR-1025 | 3 | 1968012  | 1969832  |
| DMR-1026 | 3 | 2817878  | 2818698  |
| DMR-1027 | 3 | 3686983  | 3687458  |
| DMR-1028 | 3 | 3812048  | 3813004  |
| DMR-1029 | 3 | 4759787  | 4760747  |
| DMR-1030 | 3 | 4928060  | 4930563  |

|          |   |          |          |
|----------|---|----------|----------|
| DMR-1031 | 3 | 4931523  | 4932183  |
| DMR-1032 | 3 | 5153492  | 5156612  |
| DMR-1033 | 3 | 5278085  | 5278731  |
| DMR-1034 | 3 | 5279181  | 5279726  |
| DMR-1035 | 3 | 5281545  | 5284518  |
| DMR-1036 | 3 | 5286109  | 5286663  |
| DMR-1037 | 3 | 5651302  | 5652266  |
| DMR-1038 | 3 | 5839552  | 5840347  |
| DMR-1039 | 3 | 7061219  | 7061849  |
| DMR-1040 | 3 | 7343551  | 7344491  |
| DMR-1041 | 3 | 7738889  | 7739204  |
| DMR-1042 | 3 | 7749121  | 7750426  |
| DMR-1043 | 3 | 7813946  | 7814266  |
| DMR-1044 | 3 | 7847738  | 7848087  |
| DMR-1045 | 3 | 7849933  | 7850213  |
| DMR-1046 | 3 | 7857798  | 7858190  |
| DMR-1047 | 3 | 7859655  | 7860165  |
| DMR-1048 | 3 | 8026464  | 8027289  |
| DMR-1049 | 3 | 8371669  | 8371964  |
| DMR-1050 | 3 | 8526380  | 8527535  |
| DMR-1051 | 3 | 8537433  | 8543374  |
| DMR-1052 | 3 | 8789616  | 8790056  |
| DMR-1053 | 3 | 8796545  | 8796815  |
| DMR-1054 | 3 | 8842880  | 8852635  |
| DMR-1055 | 3 | 8853626  | 8858238  |
| DMR-1056 | 3 | 8894885  | 8895195  |
| DMR-1057 | 3 | 8937125  | 8938547  |
| DMR-1058 | 3 | 8956209  | 8957544  |
| DMR-1059 | 3 | 9013953  | 9017102  |
| DMR-1060 | 3 | 9140014  | 9140899  |
| DMR-1061 | 3 | 9228167  | 9232640  |
| DMR-1062 | 3 | 9238084  | 9242146  |
| DMR-1063 | 3 | 9328936  | 9329446  |
| DMR-1064 | 3 | 9436406  | 9439321  |
| DMR-1065 | 3 | 9445436  | 9447571  |
| DMR-1066 | 3 | 9472325  | 9473025  |
| DMR-1067 | 3 | 9577096  | 9577653  |
| DMR-1068 | 3 | 9693424  | 9699210  |
| DMR-1069 | 3 | 9709133  | 9710285  |
| DMR-1070 | 3 | 10107469 | 10112729 |
| DMR-1071 | 3 | 10340943 | 10341258 |
| DMR-1072 | 3 | 10341743 | 10345018 |
| DMR-1073 | 3 | 10462200 | 10462818 |
| DMR-1074 | 3 | 10463668 | 10466159 |
| DMR-1075 | 3 | 10526695 | 10527338 |
| DMR-1076 | 3 | 10531968 | 10533278 |
| DMR-1077 | 3 | 10560373 | 10561358 |

|          |   |          |          |
|----------|---|----------|----------|
| DMR-1078 | 3 | 10562023 | 10563840 |
| DMR-1079 | 3 | 10606382 | 10606757 |
| DMR-1080 | 3 | 10637256 | 10639722 |
| DMR-1081 | 3 | 10767279 | 10767580 |
| DMR-1082 | 3 | 10811305 | 10814329 |
| DMR-1083 | 3 | 10818257 | 10820055 |
| DMR-1084 | 3 | 10836274 | 10836707 |
| DMR-1085 | 3 | 10886897 | 10890032 |
| DMR-1086 | 3 | 10918937 | 10922352 |
| DMR-1087 | 3 | 10939029 | 10939339 |
| DMR-1088 | 3 | 11017268 | 11019418 |
| DMR-1089 | 3 | 11020413 | 11022008 |
| DMR-1090 | 3 | 11029136 | 11030146 |
| DMR-1091 | 3 | 11066720 | 11068910 |
| DMR-1092 | 3 | 11093130 | 11093796 |
| DMR-1093 | 3 | 11113628 | 11114288 |
| DMR-1094 | 3 | 11117372 | 11121888 |
| DMR-1095 | 3 | 11172354 | 11176989 |
| DMR-1096 | 3 | 11222176 | 11222476 |
| DMR-1097 | 3 | 11224625 | 11225657 |
| DMR-1098 | 3 | 11296782 | 11297891 |
| DMR-1099 | 3 | 11344308 | 11345918 |
| DMR-1100 | 3 | 11347879 | 11348536 |
| DMR-1101 | 3 | 11349913 | 11355358 |
| DMR-1102 | 3 | 11356848 | 11360254 |
| DMR-1103 | 3 | 11362954 | 11363559 |
| DMR-1104 | 3 | 11366256 | 11367206 |
| DMR-1105 | 3 | 11391168 | 11391633 |
| DMR-1106 | 3 | 11393148 | 11396743 |
| DMR-1107 | 3 | 11406460 | 11407833 |
| DMR-1108 | 3 | 11410958 | 11412437 |
| DMR-1109 | 3 | 11415257 | 11415752 |
| DMR-1110 | 3 | 11428955 | 11430881 |
| DMR-1111 | 3 | 11434891 | 11437489 |
| DMR-1112 | 3 | 11445111 | 11447263 |
| DMR-1113 | 3 | 11453671 | 11454521 |
| DMR-1114 | 3 | 11455024 | 11455831 |
| DMR-1115 | 3 | 11464903 | 11465203 |
| DMR-1116 | 3 | 11476443 | 11478290 |
| DMR-1117 | 3 | 11478886 | 11480219 |
| DMR-1118 | 3 | 11486668 | 11487976 |
| DMR-1119 | 3 | 11488827 | 11489283 |
| DMR-1120 | 3 | 11516694 | 11522953 |
| DMR-1121 | 3 | 11523783 | 11524638 |
| DMR-1122 | 3 | 11525478 | 11526303 |
| DMR-1123 | 3 | 11547074 | 11548744 |
| DMR-1124 | 3 | 11551816 | 11552972 |

|          |   |          |          |
|----------|---|----------|----------|
| DMR-1125 | 3 | 11558589 | 11562240 |
| DMR-1126 | 3 | 11566840 | 11567185 |
| DMR-1127 | 3 | 11571997 | 11572790 |
| DMR-1128 | 3 | 11575310 | 11578712 |
| DMR-1129 | 3 | 11579762 | 11588650 |
| DMR-1130 | 3 | 11616558 | 11617008 |
| DMR-1131 | 3 | 11620298 | 11623484 |
| DMR-1132 | 3 | 11625744 | 11626094 |
| DMR-1133 | 3 | 11629738 | 11631066 |
| DMR-1134 | 3 | 11634376 | 11635026 |
| DMR-1135 | 3 | 11652472 | 11652832 |
| DMR-1136 | 3 | 11659589 | 11663036 |
| DMR-1137 | 3 | 11666181 | 11672933 |
| DMR-1138 | 3 | 11681402 | 11691289 |
| DMR-1139 | 3 | 11694094 | 11696542 |
| DMR-1140 | 3 | 11699832 | 11704447 |
| DMR-1141 | 3 | 11735653 | 11736453 |
| DMR-1142 | 3 | 11745751 | 11746215 |
| DMR-1143 | 3 | 11755814 | 11756479 |
| DMR-1144 | 3 | 11768329 | 11769485 |
| DMR-1145 | 3 | 11774615 | 11779206 |
| DMR-1146 | 3 | 11780227 | 11780517 |
| DMR-1147 | 3 | 11783679 | 11785786 |
| DMR-1148 | 3 | 11797070 | 11799048 |
| DMR-1149 | 3 | 11820164 | 11821817 |
| DMR-1150 | 3 | 11825881 | 11826261 |
| DMR-1151 | 3 | 11831658 | 11832368 |
| DMR-1152 | 3 | 11833311 | 11833966 |
| DMR-1153 | 3 | 11835616 | 11836316 |
| DMR-1154 | 3 | 11842264 | 11848157 |
| DMR-1155 | 3 | 11851154 | 11851519 |
| DMR-1156 | 3 | 11857577 | 11858567 |
| DMR-1157 | 3 | 11869983 | 11870823 |
| DMR-1158 | 3 | 11873443 | 11874619 |
| DMR-1159 | 3 | 11877257 | 11878197 |
| DMR-1160 | 3 | 11880032 | 11880339 |
| DMR-1161 | 3 | 11880839 | 11884014 |
| DMR-1162 | 3 | 11893099 | 11894374 |
| DMR-1163 | 3 | 11929690 | 11930185 |
| DMR-1164 | 3 | 11935156 | 11936166 |
| DMR-1165 | 3 | 11942586 | 11943706 |
| DMR-1166 | 3 | 11948002 | 11950826 |
| DMR-1167 | 3 | 11957944 | 11958214 |
| DMR-1168 | 3 | 11966792 | 11967348 |
| DMR-1169 | 3 | 12012015 | 12014325 |
| DMR-1170 | 3 | 12021293 | 12029659 |
| DMR-1171 | 3 | 12047659 | 12048799 |

|          |   |          |          |
|----------|---|----------|----------|
| DMR-1172 | 3 | 12063861 | 12064368 |
| DMR-1173 | 3 | 12096151 | 12098525 |
| DMR-1174 | 3 | 12102648 | 12103936 |
| DMR-1175 | 3 | 12153801 | 12154069 |
| DMR-1176 | 3 | 12154895 | 12157705 |
| DMR-1177 | 3 | 12162834 | 12165482 |
| DMR-1178 | 3 | 12192374 | 12193874 |
| DMR-1179 | 3 | 12212163 | 12212498 |
| DMR-1180 | 3 | 12272931 | 12277004 |
| DMR-1181 | 3 | 12284809 | 12287247 |
| DMR-1182 | 3 | 12289392 | 12289707 |
| DMR-1183 | 3 | 12294330 | 12294685 |
| DMR-1184 | 3 | 12295346 | 12296152 |
| DMR-1185 | 3 | 12306916 | 12309857 |
| DMR-1186 | 3 | 12313474 | 12314669 |
| DMR-1187 | 3 | 12328338 | 12329028 |
| DMR-1188 | 3 | 12337774 | 12339254 |
| DMR-1189 | 3 | 12347135 | 12349125 |
| DMR-1190 | 3 | 12351416 | 12351741 |
| DMR-1191 | 3 | 12380977 | 12381767 |
| DMR-1192 | 3 | 12388866 | 12390186 |
| DMR-1193 | 3 | 12397484 | 12399464 |
| DMR-1194 | 3 | 12402598 | 12403238 |
| DMR-1195 | 3 | 12420258 | 12423023 |
| DMR-1196 | 3 | 12436762 | 12437762 |
| DMR-1197 | 3 | 12447782 | 12448817 |
| DMR-1198 | 3 | 12460968 | 12462013 |
| DMR-1199 | 3 | 12464661 | 12464936 |
| DMR-1200 | 3 | 12466746 | 12467272 |
| DMR-1201 | 3 | 12505540 | 12513940 |
| DMR-1202 | 3 | 12521215 | 12523015 |
| DMR-1203 | 3 | 12528294 | 12528949 |
| DMR-1204 | 3 | 12553548 | 12557556 |
| DMR-1205 | 3 | 12562815 | 12564621 |
| DMR-1206 | 3 | 12577849 | 12580766 |
| DMR-1207 | 3 | 12581941 | 12582944 |
| DMR-1208 | 3 | 12586049 | 12591679 |
| DMR-1209 | 3 | 12592646 | 12593189 |
| DMR-1210 | 3 | 12628125 | 12630764 |
| DMR-1211 | 3 | 12632793 | 12633083 |
| DMR-1212 | 3 | 12634221 | 12634772 |
| DMR-1213 | 3 | 12637196 | 12638546 |
| DMR-1214 | 3 | 12644153 | 12645163 |
| DMR-1215 | 3 | 12647261 | 12651758 |
| DMR-1216 | 3 | 12652230 | 12655856 |
| DMR-1217 | 3 | 12678334 | 12683741 |
| DMR-1218 | 3 | 12684226 | 12686532 |

|          |   |          |          |
|----------|---|----------|----------|
| DMR-1219 | 3 | 12688006 | 12695431 |
| DMR-1220 | 3 | 12695949 | 12697920 |
| DMR-1221 | 3 | 12701577 | 12702907 |
| DMR-1222 | 3 | 12710487 | 12712922 |
| DMR-1223 | 3 | 12722545 | 12724030 |
| DMR-1224 | 3 | 12730800 | 12732557 |
| DMR-1225 | 3 | 12733272 | 12736047 |
| DMR-1226 | 3 | 12742016 | 12745982 |
| DMR-1227 | 3 | 12752242 | 12752687 |
| DMR-1228 | 3 | 12758673 | 12758989 |
| DMR-1229 | 3 | 12760341 | 12761471 |
| DMR-1230 | 3 | 12764453 | 12768208 |
| DMR-1231 | 3 | 12772538 | 12782435 |
| DMR-1232 | 3 | 12798944 | 12799384 |
| DMR-1233 | 3 | 12812435 | 12813122 |
| DMR-1234 | 3 | 12818738 | 12819043 |
| DMR-1235 | 3 | 12831618 | 12835188 |
| DMR-1236 | 3 | 12847074 | 12848885 |
| DMR-1237 | 3 | 12853053 | 12855696 |
| DMR-1238 | 3 | 12864886 | 12866106 |
| DMR-1239 | 3 | 12875333 | 12875625 |
| DMR-1240 | 3 | 12877974 | 12878304 |
| DMR-1241 | 3 | 12879306 | 12879931 |
| DMR-1242 | 3 | 12889487 | 12893308 |
| DMR-1243 | 3 | 12893768 | 12894103 |
| DMR-1244 | 3 | 12899268 | 12900408 |
| DMR-1245 | 3 | 12904842 | 12906692 |
| DMR-1246 | 3 | 12911770 | 12912740 |
| DMR-1247 | 3 | 12923506 | 12927756 |
| DMR-1248 | 3 | 12944150 | 12944810 |
| DMR-1249 | 3 | 12945415 | 12947612 |
| DMR-1250 | 3 | 12950360 | 12950910 |
| DMR-1251 | 3 | 12951400 | 12952380 |
| DMR-1252 | 3 | 12953050 | 12954340 |
| DMR-1253 | 3 | 12955511 | 12956956 |
| DMR-1254 | 3 | 12957323 | 12958478 |
| DMR-1255 | 3 | 12973508 | 12983715 |
| DMR-1256 | 3 | 12996786 | 12999587 |
| DMR-1257 | 3 | 13000352 | 13001532 |
| DMR-1258 | 3 | 13002725 | 13003023 |
| DMR-1259 | 3 | 13004863 | 13005198 |
| DMR-1260 | 3 | 13009641 | 13010476 |
| DMR-1261 | 3 | 13014103 | 13014581 |
| DMR-1262 | 3 | 13019530 | 13020860 |
| DMR-1263 | 3 | 13023678 | 13024443 |
| DMR-1264 | 3 | 13028624 | 13030750 |
| DMR-1265 | 3 | 13033413 | 13036531 |



|          |   |          |          |
|----------|---|----------|----------|
| DMR-1266 | 3 | 13048266 | 13048556 |
| DMR-1267 | 3 | 13057312 | 13062284 |
| DMR-1268 | 3 | 13074938 | 13076480 |
| DMR-1269 | 3 | 13078570 | 13079773 |
| DMR-1270 | 3 | 13081898 | 13084214 |
| DMR-1271 | 3 | 13092474 | 13093304 |
| DMR-1272 | 3 | 13093967 | 13094572 |
| DMR-1273 | 3 | 13108803 | 13117520 |
| DMR-1274 | 3 | 13133190 | 13140287 |
| DMR-1275 | 3 | 13140602 | 13141271 |
| DMR-1276 | 3 | 13147583 | 13149053 |
| DMR-1277 | 3 | 13149892 | 13152976 |
| DMR-1278 | 3 | 13164875 | 13171153 |
| DMR-1279 | 3 | 13174160 | 13175760 |
| DMR-1280 | 3 | 13206614 | 13208295 |
| DMR-1281 | 3 | 13212771 | 13213226 |
| DMR-1282 | 3 | 13213922 | 13214362 |
| DMR-1283 | 3 | 13216067 | 13216892 |
| DMR-1284 | 3 | 13218692 | 13222827 |
| DMR-1285 | 3 | 13226740 | 13227231 |
| DMR-1286 | 3 | 13236826 | 13237491 |
| DMR-1287 | 3 | 13239487 | 13239805 |
| DMR-1288 | 3 | 13241943 | 13242303 |
| DMR-1289 | 3 | 13243067 | 13243422 |
| DMR-1290 | 3 | 13245752 | 13246087 |
| DMR-1291 | 3 | 13246757 | 13247073 |
| DMR-1292 | 3 | 13251167 | 13252822 |
| DMR-1293 | 3 | 13253497 | 13254017 |
| DMR-1294 | 3 | 13258145 | 13258580 |
| DMR-1295 | 3 | 13276753 | 13279079 |
| DMR-1296 | 3 | 13279725 | 13280586 |
| DMR-1297 | 3 | 13286031 | 13290116 |
| DMR-1298 | 3 | 13290796 | 13291621 |
| DMR-1299 | 3 | 13302964 | 13303844 |
| DMR-1300 | 3 | 13304119 | 13306101 |
| DMR-1301 | 3 | 13308121 | 13310429 |
| DMR-1302 | 3 | 13316050 | 13317670 |
| DMR-1303 | 3 | 13322273 | 13328224 |
| DMR-1304 | 3 | 13347892 | 13372461 |
| DMR-1305 | 3 | 13389268 | 13390792 |
| DMR-1306 | 3 | 13391433 | 13392599 |
| DMR-1307 | 3 | 13398554 | 13399349 |
| DMR-1308 | 3 | 13403675 | 13404312 |
| DMR-1309 | 3 | 13417864 | 13419349 |
| DMR-1310 | 3 | 13434172 | 13441751 |
| DMR-1311 | 3 | 13456081 | 13456476 |
| DMR-1312 | 3 | 13475436 | 13476916 |

|          |   |          |          |
|----------|---|----------|----------|
| DMR-1313 | 3 | 13504814 | 13505104 |
| DMR-1314 | 3 | 13506800 | 13509261 |
| DMR-1315 | 3 | 13512857 | 13513666 |
| DMR-1316 | 3 | 13539122 | 13540072 |
| DMR-1317 | 3 | 13545561 | 13546686 |
| DMR-1318 | 3 | 13547849 | 13550794 |
| DMR-1319 | 3 | 13556120 | 13557599 |
| DMR-1320 | 3 | 13560753 | 13565495 |
| DMR-1321 | 3 | 13567495 | 13569145 |
| DMR-1322 | 3 | 13572433 | 13577690 |
| DMR-1323 | 3 | 13581214 | 13583854 |
| DMR-1324 | 3 | 13613685 | 13615865 |
| DMR-1325 | 3 | 13667971 | 13671251 |
| DMR-1326 | 3 | 13679032 | 13682822 |
| DMR-1327 | 3 | 13744566 | 13747996 |
| DMR-1328 | 3 | 13836582 | 13837077 |
| DMR-1329 | 3 | 13885907 | 13887267 |
| DMR-1330 | 3 | 13895479 | 13895984 |
| DMR-1331 | 3 | 13896504 | 13897139 |
| DMR-1332 | 3 | 13897484 | 13901747 |
| DMR-1333 | 3 | 13908546 | 13909336 |
| DMR-1334 | 3 | 13927500 | 13928870 |
| DMR-1335 | 3 | 13930639 | 13933790 |
| DMR-1336 | 3 | 13945200 | 13946965 |
| DMR-1337 | 3 | 13954907 | 13955387 |
| DMR-1338 | 3 | 13965958 | 13970883 |
| DMR-1339 | 3 | 13971420 | 13974717 |
| DMR-1340 | 3 | 13981162 | 13981667 |
| DMR-1341 | 3 | 13985136 | 13986401 |
| DMR-1342 | 3 | 13987426 | 13988386 |
| DMR-1343 | 3 | 13990908 | 13991733 |
| DMR-1344 | 3 | 13992548 | 13993538 |
| DMR-1345 | 3 | 13993816 | 13994373 |
| DMR-1346 | 3 | 14019275 | 14024065 |
| DMR-1347 | 3 | 14031492 | 14032817 |
| DMR-1348 | 3 | 14038586 | 14039076 |
| DMR-1349 | 3 | 14039731 | 14045136 |
| DMR-1350 | 3 | 14046501 | 14049949 |
| DMR-1351 | 3 | 14054424 | 14055539 |
| DMR-1352 | 3 | 14056710 | 14057870 |
| DMR-1353 | 3 | 14063332 | 14064107 |
| DMR-1354 | 3 | 14066637 | 14067743 |
| DMR-1355 | 3 | 14070896 | 14073390 |
| DMR-1356 | 3 | 14093703 | 14095645 |
| DMR-1357 | 3 | 14112623 | 14115271 |
| DMR-1358 | 3 | 14116594 | 14117747 |
| DMR-1359 | 3 | 14121396 | 14124831 |

|          |   |          |          |
|----------|---|----------|----------|
| DMR-1360 | 3 | 14131118 | 14137431 |
| DMR-1361 | 3 | 14170531 | 14171421 |
| DMR-1362 | 3 | 14172063 | 14176145 |
| DMR-1363 | 3 | 14178678 | 14179638 |
| DMR-1364 | 3 | 14254714 | 14256500 |
| DMR-1365 | 3 | 14257715 | 14258035 |
| DMR-1366 | 3 | 14265589 | 14266072 |
| DMR-1367 | 3 | 14272725 | 14276175 |
| DMR-1368 | 3 | 14282255 | 14283290 |
| DMR-1369 | 3 | 14284059 | 14285081 |
| DMR-1370 | 3 | 14290169 | 14296151 |
| DMR-1371 | 3 | 14299565 | 14300230 |
| DMR-1372 | 3 | 14301251 | 14304902 |
| DMR-1373 | 3 | 14313483 | 14313918 |
| DMR-1374 | 3 | 14314632 | 14315072 |
| DMR-1375 | 3 | 14325696 | 14326686 |
| DMR-1376 | 3 | 14340532 | 14341142 |
| DMR-1377 | 3 | 14343997 | 14344772 |
| DMR-1378 | 3 | 14356030 | 14360455 |
| DMR-1379 | 3 | 14364284 | 14365580 |
| DMR-1380 | 3 | 14366730 | 14369690 |
| DMR-1381 | 3 | 14371375 | 14372000 |
| DMR-1382 | 3 | 14386390 | 14387730 |
| DMR-1383 | 3 | 14388500 | 14389159 |
| DMR-1384 | 3 | 14392316 | 14398727 |
| DMR-1385 | 3 | 14399257 | 14399779 |
| DMR-1386 | 3 | 14412448 | 14414103 |
| DMR-1387 | 3 | 14440308 | 14442483 |
| DMR-1388 | 3 | 14448905 | 14449230 |
| DMR-1389 | 3 | 14465779 | 14466915 |
| DMR-1390 | 3 | 14471382 | 14472677 |
| DMR-1391 | 3 | 14479261 | 14479952 |
| DMR-1392 | 3 | 14483060 | 14483395 |
| DMR-1393 | 3 | 14486065 | 14487551 |
| DMR-1394 | 3 | 14489682 | 14491827 |
| DMR-1395 | 3 | 14492282 | 14493957 |
| DMR-1396 | 3 | 14501577 | 14502347 |
| DMR-1397 | 3 | 14505531 | 14507806 |
| DMR-1398 | 3 | 14511119 | 14512109 |
| DMR-1399 | 3 | 14514271 | 14514721 |
| DMR-1400 | 3 | 14516601 | 14525662 |
| DMR-1401 | 3 | 14526469 | 14531394 |
| DMR-1402 | 3 | 14533544 | 14535865 |
| DMR-1403 | 3 | 14536531 | 14541139 |
| DMR-1404 | 3 | 14544929 | 14545745 |
| DMR-1405 | 3 | 14548759 | 14551905 |
| DMR-1406 | 3 | 14554846 | 14555706 |

|          |   |          |          |
|----------|---|----------|----------|
| DMR-1407 | 3 | 14571688 | 14572650 |
| DMR-1408 | 3 | 14593634 | 14594150 |
| DMR-1409 | 3 | 14597088 | 14597899 |
| DMR-1410 | 3 | 14601738 | 14603024 |
| DMR-1411 | 3 | 14608324 | 14610478 |
| DMR-1412 | 3 | 14621999 | 14623294 |
| DMR-1413 | 3 | 14627089 | 14630079 |
| DMR-1414 | 3 | 14631276 | 14634186 |
| DMR-1415 | 3 | 14658980 | 14659819 |
| DMR-1416 | 3 | 14667560 | 14673640 |
| DMR-1417 | 3 | 14676808 | 14680438 |
| DMR-1418 | 3 | 14682423 | 14686383 |
| DMR-1419 | 3 | 14689684 | 14691110 |
| DMR-1420 | 3 | 14692490 | 14692923 |
| DMR-1421 | 3 | 14694958 | 14695398 |
| DMR-1422 | 3 | 14695947 | 14696922 |
| DMR-1423 | 3 | 14701233 | 14712275 |
| DMR-1424 | 3 | 14723675 | 14725968 |
| DMR-1425 | 3 | 14729450 | 14730555 |
| DMR-1426 | 3 | 14731415 | 14731861 |
| DMR-1427 | 3 | 14740336 | 14746244 |
| DMR-1428 | 3 | 14748912 | 14750513 |
| DMR-1429 | 3 | 14751223 | 14752710 |
| DMR-1430 | 3 | 14773836 | 14774941 |
| DMR-1431 | 3 | 14777134 | 14777949 |
| DMR-1432 | 3 | 14783735 | 14785160 |
| DMR-1433 | 3 | 14787961 | 14791591 |
| DMR-1434 | 3 | 14793452 | 14794078 |
| DMR-1435 | 3 | 14795728 | 14796056 |
| DMR-1436 | 3 | 14796551 | 14798535 |
| DMR-1437 | 3 | 14810742 | 14811892 |
| DMR-1438 | 3 | 14818004 | 14818664 |
| DMR-1439 | 3 | 14846901 | 14847261 |
| DMR-1440 | 3 | 14848874 | 14852534 |
| DMR-1441 | 3 | 14855778 | 14860451 |
| DMR-1442 | 3 | 14861386 | 14866182 |
| DMR-1443 | 3 | 14866502 | 14870809 |
| DMR-1444 | 3 | 14871953 | 14876794 |
| DMR-1445 | 3 | 14878239 | 14881022 |
| DMR-1446 | 3 | 14881724 | 14888146 |
| DMR-1447 | 3 | 14896203 | 14897393 |
| DMR-1448 | 3 | 14902309 | 14909464 |
| DMR-1449 | 3 | 14911759 | 14913589 |
| DMR-1450 | 3 | 14933495 | 14938441 |
| DMR-1451 | 3 | 14942954 | 14950054 |
| DMR-1452 | 3 | 14960285 | 14960555 |
| DMR-1453 | 3 | 14973632 | 14984336 |

|          |   |          |          |
|----------|---|----------|----------|
| DMR-1454 | 3 | 14985177 | 14988138 |
| DMR-1455 | 3 | 15004668 | 15008930 |
| DMR-1456 | 3 | 15011270 | 15012065 |
| DMR-1457 | 3 | 15017495 | 15018160 |
| DMR-1458 | 3 | 15031379 | 15031721 |
| DMR-1459 | 3 | 15035304 | 15036954 |
| DMR-1460 | 3 | 15044103 | 15044388 |
| DMR-1461 | 3 | 15046078 | 15048496 |
| DMR-1462 | 3 | 15050536 | 15052176 |
| DMR-1463 | 3 | 15056632 | 15058450 |
| DMR-1464 | 3 | 15061717 | 15062566 |
| DMR-1465 | 3 | 15073311 | 15079193 |
| DMR-1466 | 3 | 15096195 | 15096731 |
| DMR-1467 | 3 | 15115539 | 15118954 |
| DMR-1468 | 3 | 15121305 | 15123572 |
| DMR-1469 | 3 | 15143566 | 15145684 |
| DMR-1470 | 3 | 15152840 | 15153615 |
| DMR-1471 | 3 | 15155589 | 15156574 |
| DMR-1472 | 3 | 15186655 | 15188455 |
| DMR-1473 | 3 | 15240769 | 15243372 |
| DMR-1474 | 3 | 15277212 | 15280347 |
| DMR-1475 | 3 | 15290068 | 15293223 |
| DMR-1476 | 3 | 15295233 | 15297204 |
| DMR-1477 | 3 | 15302930 | 15304085 |
| DMR-1478 | 3 | 15305616 | 15305932 |
| DMR-1479 | 3 | 15307419 | 15307774 |
| DMR-1480 | 3 | 15309095 | 15310251 |
| DMR-1481 | 3 | 15318785 | 15325698 |
| DMR-1482 | 3 | 15327024 | 15328679 |
| DMR-1483 | 3 | 15330664 | 15334115 |
| DMR-1484 | 3 | 15334825 | 15342538 |
| DMR-1485 | 3 | 15347688 | 15348148 |
| DMR-1486 | 3 | 15356271 | 15356561 |
| DMR-1487 | 3 | 15370474 | 15372602 |
| DMR-1488 | 3 | 15383988 | 15397165 |
| DMR-1489 | 3 | 15398976 | 15404903 |
| DMR-1490 | 3 | 15409187 | 15412489 |
| DMR-1491 | 3 | 15424538 | 15426518 |
| DMR-1492 | 3 | 15430514 | 15436462 |
| DMR-1493 | 3 | 15437081 | 15438123 |
| DMR-1494 | 3 | 15440878 | 15441378 |
| DMR-1495 | 3 | 15451158 | 15455931 |
| DMR-1496 | 3 | 15456900 | 15458380 |
| DMR-1497 | 3 | 15469639 | 15471730 |
| DMR-1498 | 3 | 15490212 | 15492567 |
| DMR-1499 | 3 | 15493398 | 15493713 |
| DMR-1500 | 3 | 15498185 | 15502945 |

|          |   |          |          |
|----------|---|----------|----------|
| DMR-1501 | 3 | 15506242 | 15509027 |
| DMR-1502 | 3 | 15524751 | 15525181 |
| DMR-1503 | 3 | 15536092 | 15537447 |
| DMR-1504 | 3 | 15537727 | 15541865 |
| DMR-1505 | 3 | 15546634 | 15549666 |
| DMR-1506 | 3 | 15552591 | 15555731 |
| DMR-1507 | 3 | 15558218 | 15559173 |
| DMR-1508 | 3 | 15562535 | 15563030 |
| DMR-1509 | 3 | 15564485 | 15565780 |
| DMR-1510 | 3 | 15581951 | 15584422 |
| DMR-1511 | 3 | 15586908 | 15587939 |
| DMR-1512 | 3 | 15594323 | 15594818 |
| DMR-1513 | 3 | 15596493 | 15596958 |
| DMR-1514 | 3 | 15597453 | 15597842 |
| DMR-1515 | 3 | 15602095 | 15607554 |
| DMR-1516 | 3 | 15619620 | 15619935 |
| DMR-1517 | 3 | 15632482 | 15638053 |
| DMR-1518 | 3 | 15659990 | 15661143 |
| DMR-1519 | 3 | 15698277 | 15702423 |
| DMR-1520 | 3 | 15703910 | 15707550 |
| DMR-1521 | 3 | 15708365 | 15708663 |
| DMR-1522 | 3 | 15709220 | 15709880 |
| DMR-1523 | 3 | 15721036 | 15721866 |
| DMR-1524 | 3 | 15733942 | 15739352 |
| DMR-1525 | 3 | 15740702 | 15741711 |
| DMR-1526 | 3 | 15745979 | 15746624 |
| DMR-1527 | 3 | 15748286 | 15749596 |
| DMR-1528 | 3 | 15814138 | 15814597 |
| DMR-1529 | 3 | 15819730 | 15821536 |
| DMR-1530 | 3 | 15839404 | 15840499 |
| DMR-1531 | 3 | 15858854 | 15865246 |
| DMR-1532 | 3 | 15872239 | 15873997 |
| DMR-1533 | 3 | 15904082 | 15904384 |
| DMR-1534 | 3 | 15931106 | 15934929 |
| DMR-1535 | 3 | 15959029 | 15959299 |
| DMR-1536 | 3 | 15966424 | 15967234 |
| DMR-1537 | 3 | 15970710 | 15972725 |
| DMR-1538 | 3 | 15973325 | 15974977 |
| DMR-1539 | 3 | 16008020 | 16009675 |
| DMR-1540 | 3 | 16082613 | 16082888 |
| DMR-1541 | 3 | 16083738 | 16084065 |
| DMR-1542 | 3 | 16090022 | 16090333 |
| DMR-1543 | 3 | 16165902 | 16168022 |
| DMR-1544 | 3 | 16184523 | 16191125 |
| DMR-1545 | 3 | 16212432 | 16213102 |
| DMR-1546 | 3 | 16256031 | 16256361 |
| DMR-1547 | 3 | 16257166 | 16260312 |

|          |   |          |          |
|----------|---|----------|----------|
| DMR-1548 | 3 | 16304478 | 16305033 |
| DMR-1549 | 3 | 16332693 | 16333054 |
| DMR-1550 | 3 | 16382872 | 16383187 |
| DMR-1551 | 3 | 16467224 | 16467995 |
| DMR-1552 | 3 | 16508925 | 16509440 |
| DMR-1553 | 3 | 16521956 | 16523943 |
| DMR-1554 | 3 | 16537151 | 16537961 |
| DMR-1555 | 3 | 16538652 | 16539938 |
| DMR-1556 | 3 | 16567011 | 16567378 |
| DMR-1557 | 3 | 16602315 | 16604798 |
| DMR-1558 | 3 | 16605830 | 16607125 |
| DMR-1559 | 3 | 16613420 | 16615397 |
| DMR-1560 | 3 | 16649710 | 16652158 |
| DMR-1561 | 3 | 16653345 | 16653948 |
| DMR-1562 | 3 | 16657628 | 16658465 |
| DMR-1563 | 3 | 16682555 | 16683010 |
| DMR-1564 | 3 | 16693080 | 16693890 |
| DMR-1565 | 3 | 16702155 | 16709225 |
| DMR-1566 | 3 | 16721122 | 16722919 |
| DMR-1567 | 3 | 16730023 | 16731208 |
| DMR-1568 | 3 | 16821132 | 16825096 |
| DMR-1569 | 3 | 16839914 | 16840444 |
| DMR-1570 | 3 | 16841244 | 16843054 |
| DMR-1571 | 3 | 16858218 | 16860083 |
| DMR-1572 | 3 | 16947346 | 16948145 |
| DMR-1573 | 3 | 16950328 | 16950658 |
| DMR-1574 | 3 | 16968323 | 16971958 |
| DMR-1575 | 3 | 16973403 | 16973908 |
| DMR-1576 | 3 | 17066626 | 17068591 |
| DMR-1577 | 3 | 17070254 | 17070914 |
| DMR-1578 | 3 | 17071279 | 17071619 |
| DMR-1579 | 3 | 17122093 | 17122383 |
| DMR-1580 | 3 | 17125577 | 17125903 |
| DMR-1581 | 3 | 17158060 | 17158394 |
| DMR-1582 | 3 | 17175403 | 17175728 |
| DMR-1583 | 3 | 17367780 | 17368075 |
| DMR-1584 | 3 | 17440504 | 17440845 |
| DMR-1585 | 3 | 17443535 | 17445674 |
| DMR-1586 | 3 | 17447489 | 17448620 |
| DMR-1587 | 3 | 17989312 | 17996417 |
| DMR-1588 | 3 | 18080249 | 18081216 |
| DMR-1589 | 3 | 18098071 | 18098700 |
| DMR-1590 | 3 | 18370976 | 18371431 |
| DMR-1591 | 3 | 18802106 | 18802476 |
| DMR-1592 | 3 | 18803786 | 18805767 |
| DMR-1593 | 3 | 18806922 | 18807222 |
| DMR-1594 | 3 | 20611370 | 20612135 |

|          |   |          |          |
|----------|---|----------|----------|
| DMR-1595 | 3 | 20675059 | 20675334 |
| DMR-1596 | 3 | 20737079 | 20738412 |
| DMR-1597 | 3 | 22081813 | 22082178 |
| DMR-1598 | 3 | 22124026 | 22124532 |
| DMR-1599 | 3 | 22124897 | 22126675 |
| DMR-1600 | 3 | 22243503 | 22246468 |
| DMR-1601 | 3 | 22249821 | 22250258 |
| DMR-1602 | 3 | 22252078 | 22253265 |
| DMR-1603 | 3 | 22393863 | 22402437 |
| DMR-1604 | 3 | 22757461 | 22757983 |
| DMR-1605 | 3 | 23121843 | 23123599 |
| DMR-1606 | 3 | 23215509 | 23218355 |
| DMR-1607 | 4 | 1346     | 2177     |
| DMR-1608 | 4 | 49883    | 50223    |
| DMR-1609 | 4 | 179049   | 179394   |
| DMR-1610 | 4 | 248703   | 249488   |
| DMR-1611 | 4 | 378906   | 379226   |
| DMR-1612 | 4 | 415005   | 415524   |
| DMR-1613 | 4 | 594231   | 594496   |
| DMR-1614 | 4 | 633119   | 636937   |
| DMR-1615 | 4 | 650283   | 650633   |
| DMR-1616 | 4 | 788271   | 788751   |
| DMR-1617 | 4 | 861167   | 863012   |
| DMR-1618 | 4 | 864447   | 865638   |
| DMR-1619 | 4 | 1017393  | 1018753  |
| DMR-1620 | 4 | 1020858  | 1021533  |
| DMR-1621 | 4 | 1027014  | 1027309  |
| DMR-1622 | 4 | 1063645  | 1064292  |
| DMR-1623 | 4 | 1312610  | 1315610  |
| DMR-1624 | 4 | 1395963  | 1397223  |
| DMR-1625 | 4 | 1438535  | 1439135  |
| DMR-1626 | 4 | 1447714  | 1448102  |
| DMR-1627 | 4 | 1449754  | 1455849  |
| DMR-1628 | 4 | 1456849  | 1460754  |
| DMR-1629 | 4 | 1461909  | 1463440  |
| DMR-1630 | 4 | 1485369  | 1485866  |
| DMR-1631 | 4 | 1568529  | 1568834  |
| DMR-1632 | 4 | 1588355  | 1589015  |
| DMR-1633 | 4 | 1592613  | 1594726  |
| DMR-1634 | 4 | 1596067  | 1597228  |
| DMR-1635 | 4 | 1629898  | 1632573  |
| DMR-1636 | 4 | 1635544  | 1636175  |
| DMR-1637 | 4 | 1639315  | 1641133  |
| DMR-1638 | 4 | 1647079  | 1650360  |
| DMR-1639 | 4 | 1666216  | 1667867  |
| DMR-1640 | 4 | 1669202  | 1669682  |
| DMR-1641 | 4 | 1671292  | 1671842  |



|          |   |         |         |
|----------|---|---------|---------|
| DMR-1642 | 4 | 1673102 | 1675784 |
| DMR-1643 | 4 | 1677259 | 1677559 |
| DMR-1644 | 4 | 1678109 | 1678774 |
| DMR-1645 | 4 | 1744903 | 1746218 |
| DMR-1646 | 4 | 1752482 | 1753632 |
| DMR-1647 | 4 | 1761084 | 1762922 |
| DMR-1648 | 4 | 1789984 | 1791244 |
| DMR-1649 | 4 | 1792739 | 1794717 |
| DMR-1650 | 4 | 1797403 | 1798008 |
| DMR-1651 | 4 | 1799168 | 1799543 |
| DMR-1652 | 4 | 1807419 | 1807912 |
| DMR-1653 | 4 | 1820123 | 1823150 |
| DMR-1654 | 4 | 1823758 | 1824406 |
| DMR-1655 | 4 | 1827542 | 1830057 |
| DMR-1656 | 4 | 1836482 | 1837117 |
| DMR-1657 | 4 | 1846186 | 1847676 |
| DMR-1658 | 4 | 1848556 | 1850185 |
| DMR-1659 | 4 | 1856114 | 1856584 |
| DMR-1660 | 4 | 1857244 | 1859444 |
| DMR-1661 | 4 | 1865176 | 1866486 |
| DMR-1662 | 4 | 1922637 | 1924607 |
| DMR-1663 | 4 | 1961217 | 1961702 |
| DMR-1664 | 4 | 1968459 | 1973961 |
| DMR-1665 | 4 | 1976874 | 1979234 |
| DMR-1666 | 4 | 1982859 | 1984160 |
| DMR-1667 | 4 | 1987439 | 1993922 |
| DMR-1668 | 4 | 1996722 | 1997328 |
| DMR-1669 | 4 | 2003817 | 2004432 |
| DMR-1670 | 4 | 2005917 | 2008256 |
| DMR-1671 | 4 | 2013229 | 2013881 |
| DMR-1672 | 4 | 2036475 | 2036788 |
| DMR-1673 | 4 | 2041112 | 2044890 |
| DMR-1674 | 4 | 2046033 | 2048209 |
| DMR-1675 | 4 | 2056936 | 2060069 |
| DMR-1676 | 4 | 2064710 | 2069637 |
| DMR-1677 | 4 | 2079396 | 2080506 |
| DMR-1678 | 4 | 2090087 | 2093053 |
| DMR-1679 | 4 | 2099145 | 2105120 |
| DMR-1680 | 4 | 2107230 | 2110519 |
| DMR-1681 | 4 | 2136479 | 2143881 |
| DMR-1682 | 4 | 2149316 | 2150151 |
| DMR-1683 | 4 | 2154445 | 2157229 |
| DMR-1684 | 4 | 2158544 | 2159687 |
| DMR-1685 | 4 | 2163337 | 2164367 |
| DMR-1686 | 4 | 2171105 | 2175733 |
| DMR-1687 | 4 | 2176043 | 2177404 |
| DMR-1688 | 4 | 2178034 | 2179053 |

|          |   |         |         |
|----------|---|---------|---------|
| DMR-1689 | 4 | 2183672 | 2184272 |
| DMR-1690 | 4 | 2184992 | 2185267 |
| DMR-1691 | 4 | 2188113 | 2203742 |
| DMR-1692 | 4 | 2205950 | 2208691 |
| DMR-1693 | 4 | 2210341 | 2211528 |
| DMR-1694 | 4 | 2212028 | 2214798 |
| DMR-1695 | 4 | 2222116 | 2222551 |
| DMR-1696 | 4 | 2225902 | 2226182 |
| DMR-1697 | 4 | 2235154 | 2237896 |
| DMR-1698 | 4 | 2250134 | 2252125 |
| DMR-1699 | 4 | 2254091 | 2256545 |
| DMR-1700 | 4 | 2263009 | 2264516 |
| DMR-1701 | 4 | 2270465 | 2273400 |
| DMR-1702 | 4 | 2279834 | 2288764 |
| DMR-1703 | 4 | 2297653 | 2298788 |
| DMR-1704 | 4 | 2302576 | 2308022 |
| DMR-1705 | 4 | 2309384 | 2310726 |
| DMR-1706 | 4 | 2311384 | 2311714 |
| DMR-1707 | 4 | 2355263 | 2355598 |
| DMR-1708 | 4 | 2356046 | 2357721 |
| DMR-1709 | 4 | 2419396 | 2419936 |
| DMR-1710 | 4 | 2420411 | 2420945 |
| DMR-1711 | 4 | 2425200 | 2426040 |
| DMR-1712 | 4 | 2561855 | 2562292 |
| DMR-1713 | 4 | 2584620 | 2585240 |
| DMR-1714 | 4 | 2596832 | 2603097 |
| DMR-1715 | 4 | 2606212 | 2607500 |
| DMR-1716 | 4 | 2642156 | 2648752 |
| DMR-1717 | 4 | 2695821 | 2701880 |
| DMR-1718 | 4 | 2702710 | 2707050 |
| DMR-1719 | 4 | 2708035 | 2708372 |
| DMR-1720 | 4 | 2710188 | 2714125 |
| DMR-1721 | 4 | 2730103 | 2731801 |
| DMR-1722 | 4 | 2785747 | 2786907 |
| DMR-1723 | 4 | 2787572 | 2788233 |
| DMR-1724 | 4 | 2791473 | 2793018 |
| DMR-1725 | 4 | 2809502 | 2811120 |
| DMR-1726 | 4 | 2840988 | 2841366 |
| DMR-1727 | 4 | 2842312 | 2842787 |
| DMR-1728 | 4 | 2845313 | 2849759 |
| DMR-1729 | 4 | 2850430 | 2850920 |
| DMR-1730 | 4 | 2852195 | 2855200 |
| DMR-1731 | 4 | 2896302 | 2897572 |
| DMR-1732 | 4 | 2899556 | 2904543 |
| DMR-1733 | 4 | 2917906 | 2918741 |
| DMR-1734 | 4 | 2966066 | 2966551 |
| DMR-1735 | 4 | 2982274 | 2983224 |

|          |   |         |         |
|----------|---|---------|---------|
| DMR-1736 | 4 | 2983754 | 2985514 |
| DMR-1737 | 4 | 2997083 | 2997943 |
| DMR-1738 | 4 | 3002066 | 3003551 |
| DMR-1739 | 4 | 3050359 | 3052514 |
| DMR-1740 | 4 | 3062090 | 3069212 |
| DMR-1741 | 4 | 3069717 | 3071982 |
| DMR-1742 | 4 | 3075992 | 3078282 |
| DMR-1743 | 4 | 3101042 | 3102172 |
| DMR-1744 | 4 | 3116202 | 3122651 |
| DMR-1745 | 4 | 3129448 | 3130223 |
| DMR-1746 | 4 | 3130713 | 3131238 |
| DMR-1747 | 4 | 3134839 | 3137156 |
| DMR-1748 | 4 | 3138800 | 3145420 |
| DMR-1749 | 4 | 3285687 | 3287652 |
| DMR-1750 | 4 | 3292909 | 3299374 |
| DMR-1751 | 4 | 3301512 | 3308118 |
| DMR-1752 | 4 | 3315016 | 3315346 |
| DMR-1753 | 4 | 3317711 | 3318351 |
| DMR-1754 | 4 | 3319036 | 3321981 |
| DMR-1755 | 4 | 3322941 | 3326071 |
| DMR-1756 | 4 | 3330408 | 3331687 |
| DMR-1757 | 4 | 3360614 | 3361429 |
| DMR-1758 | 4 | 3364190 | 3366030 |
| DMR-1759 | 4 | 3367340 | 3369655 |
| DMR-1760 | 4 | 3370683 | 3371328 |
| DMR-1761 | 4 | 3384211 | 3386508 |
| DMR-1762 | 4 | 3393236 | 3394769 |
| DMR-1763 | 4 | 3405807 | 3408122 |
| DMR-1764 | 4 | 3411232 | 3415179 |
| DMR-1765 | 4 | 3417186 | 3418862 |
| DMR-1766 | 4 | 3422432 | 3423107 |
| DMR-1767 | 4 | 3423627 | 3427223 |
| DMR-1768 | 4 | 3429578 | 3430545 |
| DMR-1769 | 4 | 3433360 | 3436985 |
| DMR-1770 | 4 | 3444605 | 3445257 |
| DMR-1771 | 4 | 3448202 | 3451852 |
| DMR-1772 | 4 | 3464211 | 3465996 |
| DMR-1773 | 4 | 3466383 | 3467355 |
| DMR-1774 | 4 | 3472798 | 3474618 |
| DMR-1775 | 4 | 3476097 | 3480542 |
| DMR-1776 | 4 | 3485679 | 3487789 |
| DMR-1777 | 4 | 3501303 | 3503120 |
| DMR-1778 | 4 | 3503945 | 3505655 |
| DMR-1779 | 4 | 3518626 | 3519791 |
| DMR-1780 | 4 | 3520997 | 3522318 |
| DMR-1781 | 4 | 3522800 | 3524570 |
| DMR-1782 | 4 | 3525396 | 3527433 |

|          |   |         |         |
|----------|---|---------|---------|
| DMR-1783 | 4 | 3533867 | 3536281 |
| DMR-1784 | 4 | 3565525 | 3565860 |
| DMR-1785 | 4 | 3573252 | 3573757 |
| DMR-1786 | 4 | 3574457 | 3575117 |
| DMR-1787 | 4 | 3577092 | 3582648 |
| DMR-1788 | 4 | 3593758 | 3595857 |
| DMR-1789 | 4 | 3597855 | 3603108 |
| DMR-1790 | 4 | 3605808 | 3610379 |
| DMR-1791 | 4 | 3628856 | 3629381 |
| DMR-1792 | 4 | 3640781 | 3647018 |
| DMR-1793 | 4 | 3647858 | 3649143 |
| DMR-1794 | 4 | 3652663 | 3653605 |
| DMR-1795 | 4 | 3655094 | 3659705 |
| DMR-1796 | 4 | 3671974 | 3672459 |
| DMR-1797 | 4 | 3680192 | 3682839 |
| DMR-1798 | 4 | 3683359 | 3683960 |
| DMR-1799 | 4 | 3685475 | 3689756 |
| DMR-1800 | 4 | 3690397 | 3690782 |
| DMR-1801 | 4 | 3707081 | 3715518 |
| DMR-1802 | 4 | 3718168 | 3718628 |
| DMR-1803 | 4 | 3719963 | 3722449 |
| DMR-1804 | 4 | 3723288 | 3723917 |
| DMR-1805 | 4 | 3726063 | 3726373 |
| DMR-1806 | 4 | 3726918 | 3727888 |
| DMR-1807 | 4 | 3734157 | 3735812 |
| DMR-1808 | 4 | 3751328 | 3753103 |
| DMR-1809 | 4 | 3754128 | 3756927 |
| DMR-1810 | 4 | 3758210 | 3759727 |
| DMR-1811 | 4 | 3795890 | 3797500 |
| DMR-1812 | 4 | 3803124 | 3804119 |
| DMR-1813 | 4 | 3824585 | 3828349 |
| DMR-1814 | 4 | 3830505 | 3831365 |
| DMR-1815 | 4 | 3837594 | 3838294 |
| DMR-1816 | 4 | 3852423 | 3857391 |
| DMR-1817 | 4 | 3880354 | 3883009 |
| DMR-1818 | 4 | 3883829 | 3885754 |
| DMR-1819 | 4 | 3888763 | 3890103 |
| DMR-1820 | 4 | 3907067 | 3910232 |
| DMR-1821 | 4 | 3913026 | 3913536 |
| DMR-1822 | 4 | 3920752 | 3921447 |
| DMR-1823 | 4 | 3921727 | 3922552 |
| DMR-1824 | 4 | 3938607 | 3939053 |
| DMR-1825 | 4 | 4077660 | 4079314 |
| DMR-1826 | 4 | 4081670 | 4086562 |
| DMR-1827 | 4 | 4089860 | 4092547 |
| DMR-1828 | 4 | 4111142 | 4113621 |
| DMR-1829 | 4 | 4117931 | 4118761 |

|          |   |         |         |
|----------|---|---------|---------|
| DMR-1830 | 4 | 4127859 | 4132778 |
| DMR-1831 | 4 | 4136448 | 4136733 |
| DMR-1832 | 4 | 4153901 | 4155260 |
| DMR-1833 | 4 | 4162810 | 4163285 |
| DMR-1834 | 4 | 4164333 | 4165643 |
| DMR-1835 | 4 | 4166313 | 4167088 |
| DMR-1836 | 4 | 4171701 | 4175036 |
| DMR-1837 | 4 | 4250264 | 4252431 |
| DMR-1838 | 4 | 4265805 | 4266931 |
| DMR-1839 | 4 | 4267401 | 4268226 |
| DMR-1840 | 4 | 4272356 | 4274698 |
| DMR-1841 | 4 | 4283587 | 4286601 |
| DMR-1842 | 4 | 4293140 | 4293805 |
| DMR-1843 | 4 | 4319094 | 4320859 |
| DMR-1844 | 4 | 4325662 | 4326002 |
| DMR-1845 | 4 | 4335887 | 4336713 |
| DMR-1846 | 4 | 4339870 | 4341172 |
| DMR-1847 | 4 | 4345663 | 4346146 |
| DMR-1848 | 4 | 4351892 | 4352732 |
| DMR-1849 | 4 | 4353912 | 4354682 |
| DMR-1850 | 4 | 4358332 | 4359964 |
| DMR-1851 | 4 | 4376492 | 4381632 |
| DMR-1852 | 4 | 4389186 | 4391842 |
| DMR-1853 | 4 | 4394491 | 4400778 |
| DMR-1854 | 4 | 4422497 | 4424477 |
| DMR-1855 | 4 | 4445455 | 4447260 |
| DMR-1856 | 4 | 4455850 | 4462922 |
| DMR-1857 | 4 | 4485567 | 4487067 |
| DMR-1858 | 4 | 4489827 | 4490996 |
| DMR-1859 | 4 | 4503523 | 4503843 |
| DMR-1860 | 4 | 4504343 | 4505843 |
| DMR-1861 | 4 | 4506979 | 4510464 |
| DMR-1862 | 4 | 4539542 | 4540007 |
| DMR-1863 | 4 | 4550762 | 4551422 |
| DMR-1864 | 4 | 4568083 | 4573032 |
| DMR-1865 | 4 | 4588715 | 4589161 |
| DMR-1866 | 4 | 4590672 | 4594634 |
| DMR-1867 | 4 | 4604182 | 4605673 |
| DMR-1868 | 4 | 4606661 | 4608185 |
| DMR-1869 | 4 | 4611100 | 4612759 |
| DMR-1870 | 4 | 4613461 | 4614391 |
| DMR-1871 | 4 | 4615116 | 4615601 |
| DMR-1872 | 4 | 4623691 | 4627766 |
| DMR-1873 | 4 | 4628919 | 4633706 |
| DMR-1874 | 4 | 4642441 | 4642941 |
| DMR-1875 | 4 | 4653031 | 4654051 |
| DMR-1876 | 4 | 4665274 | 4676656 |

|          |   |         |         |
|----------|---|---------|---------|
| DMR-1877 | 4 | 4696457 | 4703844 |
| DMR-1878 | 4 | 4704695 | 4705510 |
| DMR-1879 | 4 | 4711416 | 4716693 |
| DMR-1880 | 4 | 4718724 | 4720694 |
| DMR-1881 | 4 | 4730724 | 4732878 |
| DMR-1882 | 4 | 4733238 | 4735513 |
| DMR-1883 | 4 | 4739506 | 4740481 |
| DMR-1884 | 4 | 4742818 | 4746454 |
| DMR-1885 | 4 | 4749916 | 4757176 |
| DMR-1886 | 4 | 4764441 | 4765696 |
| DMR-1887 | 4 | 4782418 | 4788161 |
| DMR-1888 | 4 | 4861117 | 4862429 |
| DMR-1889 | 4 | 4864243 | 4866216 |
| DMR-1890 | 4 | 4872490 | 4873115 |
| DMR-1891 | 4 | 4878454 | 4879074 |
| DMR-1892 | 4 | 4911914 | 4915029 |
| DMR-1893 | 4 | 4928232 | 4930716 |
| DMR-1894 | 4 | 4932052 | 4932737 |
| DMR-1895 | 4 | 4951544 | 4954674 |
| DMR-1896 | 4 | 4955290 | 4955670 |
| DMR-1897 | 4 | 4973609 | 4978055 |
| DMR-1898 | 4 | 4979870 | 4980890 |
| DMR-1899 | 4 | 4997366 | 4998241 |
| DMR-1900 | 4 | 4999681 | 5003185 |
| DMR-1901 | 4 | 5004468 | 5007767 |
| DMR-1902 | 4 | 5028895 | 5030065 |
| DMR-1903 | 4 | 5039467 | 5043229 |
| DMR-1904 | 4 | 5046218 | 5048224 |
| DMR-1905 | 4 | 5077279 | 5078214 |
| DMR-1906 | 4 | 5079424 | 5081900 |
| DMR-1907 | 4 | 5102191 | 5104463 |
| DMR-1908 | 4 | 5116321 | 5117666 |
| DMR-1909 | 4 | 5124451 | 5125409 |
| DMR-1910 | 4 | 5136640 | 5138938 |
| DMR-1911 | 4 | 5139973 | 5141611 |
| DMR-1912 | 4 | 5141956 | 5142391 |
| DMR-1913 | 4 | 5175435 | 5176065 |
| DMR-1914 | 4 | 5190299 | 5190738 |
| DMR-1915 | 4 | 5207957 | 5210103 |
| DMR-1916 | 4 | 5216666 | 5218321 |
| DMR-1917 | 4 | 5303817 | 5308932 |
| DMR-1918 | 4 | 5342743 | 5344531 |
| DMR-1919 | 4 | 5350812 | 5351649 |
| DMR-1920 | 4 | 5468765 | 5470776 |
| DMR-1921 | 4 | 5477890 | 5478170 |
| DMR-1922 | 4 | 5479496 | 5480971 |
| DMR-1923 | 4 | 5481345 | 5483015 |

|          |   |         |         |
|----------|---|---------|---------|
| DMR-1924 | 4 | 5484117 | 5486134 |
| DMR-1925 | 4 | 5489221 | 5490592 |
| DMR-1926 | 4 | 5494070 | 5494833 |
| DMR-1927 | 4 | 5505782 | 5506230 |
| DMR-1928 | 4 | 5507085 | 5512217 |
| DMR-1929 | 4 | 5514996 | 5515296 |
| DMR-1930 | 4 | 5544009 | 5545514 |
| DMR-1931 | 4 | 5555107 | 5556550 |
| DMR-1932 | 4 | 5570952 | 5572062 |
| DMR-1933 | 4 | 5574755 | 5575375 |
| DMR-1934 | 4 | 5588246 | 5589431 |
| DMR-1935 | 4 | 5590701 | 5596682 |
| DMR-1936 | 4 | 5602584 | 5602968 |
| DMR-1937 | 4 | 5623225 | 5625700 |
| DMR-1938 | 4 | 5627718 | 5630511 |
| DMR-1939 | 4 | 5646847 | 5647355 |
| DMR-1940 | 4 | 5650154 | 5650639 |
| DMR-1941 | 4 | 5651314 | 5651754 |
| DMR-1942 | 4 | 5655058 | 5656729 |
| DMR-1943 | 4 | 5658407 | 5658842 |
| DMR-1944 | 4 | 5672761 | 5673058 |
| DMR-1945 | 4 | 5673393 | 5673915 |
| DMR-1946 | 4 | 5681660 | 5682654 |
| DMR-1947 | 4 | 5683325 | 5692501 |
| DMR-1948 | 4 | 5693821 | 5697949 |
| DMR-1949 | 4 | 5751470 | 5752399 |
| DMR-1950 | 4 | 5766434 | 5769097 |
| DMR-1951 | 4 | 5822380 | 5827370 |
| DMR-1952 | 4 | 5862018 | 5864623 |
| DMR-1953 | 4 | 5870591 | 5871031 |
| DMR-1954 | 4 | 5879330 | 5881930 |
| DMR-1955 | 4 | 5887919 | 5888399 |
| DMR-1956 | 4 | 5905577 | 5908182 |
| DMR-1957 | 4 | 5913994 | 5916774 |
| DMR-1958 | 4 | 5937095 | 5938217 |
| DMR-1959 | 4 | 5939694 | 5943984 |
| DMR-1960 | 4 | 5946134 | 5948296 |
| DMR-1961 | 4 | 5951286 | 5952437 |
| DMR-1962 | 4 | 5953710 | 5955181 |
| DMR-1963 | 4 | 5956369 | 5959152 |
| DMR-1964 | 4 | 5961152 | 5961513 |
| DMR-1965 | 4 | 5965792 | 5971022 |
| DMR-1966 | 4 | 5987192 | 5991817 |
| DMR-1967 | 4 | 6010995 | 6011325 |
| DMR-1968 | 4 | 6035420 | 6036060 |
| DMR-1969 | 4 | 6059158 | 6061610 |
| DMR-1970 | 4 | 6067388 | 6072673 |

|          |   |         |         |
|----------|---|---------|---------|
| DMR-1971 | 4 | 6098741 | 6099061 |
| DMR-1972 | 4 | 6112787 | 6114123 |
| DMR-1973 | 4 | 6114918 | 6115253 |
| DMR-1974 | 4 | 6125997 | 6130122 |
| DMR-1975 | 4 | 6156365 | 6157486 |
| DMR-1976 | 4 | 6166918 | 6167403 |
| DMR-1977 | 4 | 6194763 | 6195446 |
| DMR-1978 | 4 | 6197575 | 6200071 |
| DMR-1979 | 4 | 6205838 | 6206645 |
| DMR-1980 | 4 | 6209501 | 6213591 |
| DMR-1981 | 4 | 6214264 | 6214791 |
| DMR-1982 | 4 | 6326440 | 6326926 |
| DMR-1983 | 4 | 6388807 | 6389672 |
| DMR-1984 | 4 | 6467386 | 6472846 |
| DMR-1985 | 4 | 6482028 | 6482358 |
| DMR-1986 | 4 | 6581901 | 6583501 |
| DMR-1987 | 4 | 6597920 | 6598725 |
| DMR-1988 | 4 | 6638965 | 6639297 |
| DMR-1989 | 4 | 6723446 | 6729234 |
| DMR-1990 | 4 | 6787835 | 6788105 |
| DMR-1991 | 4 | 6791904 | 6792454 |
| DMR-1992 | 4 | 6885947 | 6886327 |
| DMR-1993 | 4 | 6916150 | 6919455 |
| DMR-1994 | 4 | 6977248 | 6977863 |
| DMR-1995 | 4 | 7358230 | 7358840 |
| DMR-1996 | 4 | 7592313 | 7592818 |
| DMR-1997 | 4 | 7711114 | 7711454 |
| DMR-1998 | 4 | 7890527 | 7891464 |
| DMR-1999 | 4 | 7908667 | 7909290 |
| DMR-2000 | 4 | 7945137 | 7945455 |
| DMR-2001 | 4 | 7989304 | 7989666 |
| DMR-2002 | 4 | 8109456 | 8110246 |
| DMR-2003 | 4 | 8148075 | 8150547 |
| DMR-2004 | 4 | 8313708 | 8319324 |
| DMR-2005 | 4 | 8327940 | 8329535 |
| DMR-2006 | 4 | 8393120 | 8393425 |
| DMR-2007 | 4 | 8620148 | 8623068 |
| DMR-2008 | 4 | 8866009 | 8866504 |
| DMR-2009 | 4 | 8906581 | 8907231 |
| DMR-2010 | 4 | 8942864 | 8943189 |
| DMR-2011 | 4 | 9005540 | 9006530 |
| DMR-2012 | 4 | 9055207 | 9057077 |
| DMR-2013 | 4 | 9068914 | 9078668 |
| DMR-2014 | 4 | 9483934 | 9485359 |
| DMR-2015 | 4 | 9486574 | 9490039 |
| DMR-2016 | 4 | 9734038 | 9737673 |
| DMR-2017 | 4 | 9800885 | 9801195 |



|          |   |          |          |
|----------|---|----------|----------|
| DMR-2018 | 4 | 9954454  | 9955339  |
| DMR-2019 | 4 | 9955982  | 9957759  |
| DMR-2020 | 4 | 9987956  | 9988281  |
| DMR-2021 | 4 | 10313542 | 10314172 |
| DMR-2022 | 4 | 10527354 | 10529034 |
| DMR-2023 | 4 | 10755078 | 10756523 |
| DMR-2024 | 4 | 10866094 | 10866444 |
| DMR-2025 | 4 | 10915745 | 10916456 |
| DMR-2026 | 4 | 10992797 | 10997912 |
| DMR-2027 | 4 | 11039328 | 11040489 |
| DMR-2028 | 4 | 11045990 | 11046270 |
| DMR-2029 | 4 | 11113441 | 11114286 |
| DMR-2030 | 4 | 11343755 | 11344145 |
| DMR-2031 | 4 | 11363449 | 11369169 |
| DMR-2032 | 4 | 11372791 | 11373489 |
| DMR-2033 | 4 | 11677579 | 11679259 |
| DMR-2034 | 4 | 11680579 | 11681364 |
| DMR-2035 | 4 | 11820310 | 11824620 |
| DMR-2036 | 4 | 11825565 | 11826547 |
| DMR-2037 | 4 | 11834147 | 11837117 |
| DMR-2038 | 4 | 12293680 | 12294976 |
| DMR-2039 | 4 | 13624419 | 13631859 |
| DMR-2040 | 4 | 14272233 | 14272539 |
| DMR-2041 | 4 | 14279991 | 14280784 |
| DMR-2042 | 4 | 14282897 | 14285059 |
| DMR-2043 | 4 | 14287909 | 14288525 |
| DMR-2044 | 4 | 14531237 | 14532254 |
| DMR-2045 | 4 | 14987455 | 14988333 |
| DMR-2046 | 4 | 17712926 | 17716726 |
| DMR-2047 | 4 | 18247864 | 18248199 |
| DMR-2048 | 5 | 28562    | 29917    |
| DMR-2049 | 5 | 250204   | 250970   |
| DMR-2050 | 5 | 1064628  | 1067755  |
| DMR-2051 | 5 | 1229746  | 1230458  |
| DMR-2052 | 5 | 1285043  | 1285373  |
| DMR-2053 | 5 | 1488528  | 1488798  |
| DMR-2054 | 5 | 1686487  | 1686997  |
| DMR-2055 | 5 | 2262159  | 2262544  |
| DMR-2056 | 5 | 2374188  | 2375393  |
| DMR-2057 | 5 | 2688575  | 2688845  |
| DMR-2058 | 5 | 3005869  | 3007624  |
| DMR-2059 | 5 | 3249529  | 3249844  |
| DMR-2060 | 5 | 3904284  | 3910896  |
| DMR-2061 | 5 | 3944883  | 3945355  |
| DMR-2062 | 5 | 3946029  | 3946484  |
| DMR-2063 | 5 | 4320753  | 4323348  |
| DMR-2064 | 5 | 5217184  | 5218628  |

|          |   |         |         |
|----------|---|---------|---------|
| DMR-2065 | 5 | 5219988 | 5221275 |
| DMR-2066 | 5 | 5630514 | 5634765 |
| DMR-2067 | 5 | 5635294 | 5635620 |
| DMR-2068 | 5 | 5643880 | 5644829 |
| DMR-2069 | 5 | 5739400 | 5739865 |
| DMR-2070 | 5 | 5853103 | 5853918 |
| DMR-2071 | 5 | 6407124 | 6407784 |
| DMR-2072 | 5 | 6433688 | 6438813 |
| DMR-2073 | 5 | 7027577 | 7028347 |
| DMR-2074 | 5 | 7118301 | 7118816 |
| DMR-2075 | 5 | 7823819 | 7824639 |
| DMR-2076 | 5 | 7829151 | 7829759 |
| DMR-2077 | 5 | 8204019 | 8204359 |
| DMR-2078 | 5 | 8255943 | 8256273 |
| DMR-2079 | 5 | 8400162 | 8401314 |
| DMR-2080 | 5 | 8574747 | 8577717 |
| DMR-2081 | 5 | 8622629 | 8624390 |
| DMR-2082 | 5 | 8625600 | 8627255 |
| DMR-2083 | 5 | 8628355 | 8629565 |
| DMR-2084 | 5 | 8666296 | 8667301 |
| DMR-2085 | 5 | 8702770 | 8703590 |
| DMR-2086 | 5 | 8788121 | 8788791 |
| DMR-2087 | 5 | 9020223 | 9022243 |
| DMR-2088 | 5 | 9048612 | 9049429 |
| DMR-2089 | 5 | 9056525 | 9056851 |
| DMR-2090 | 5 | 9061522 | 9062462 |
| DMR-2091 | 5 | 9091022 | 9092162 |
| DMR-2092 | 5 | 9101959 | 9102392 |
| DMR-2093 | 5 | 9203261 | 9203876 |
| DMR-2094 | 5 | 9206569 | 9207339 |
| DMR-2095 | 5 | 9211186 | 9212626 |
| DMR-2096 | 5 | 9215111 | 9218606 |
| DMR-2097 | 5 | 9220262 | 9220699 |
| DMR-2098 | 5 | 9253069 | 9254079 |
| DMR-2099 | 5 | 9272239 | 9274544 |
| DMR-2100 | 5 | 9344652 | 9345272 |
| DMR-2101 | 5 | 9346484 | 9347109 |
| DMR-2102 | 5 | 9347624 | 9348964 |
| DMR-2103 | 5 | 9412161 | 9414631 |
| DMR-2104 | 5 | 9544984 | 9545468 |
| DMR-2105 | 5 | 9561317 | 9563131 |
| DMR-2106 | 5 | 9565936 | 9567031 |
| DMR-2107 | 5 | 9570010 | 9570720 |
| DMR-2108 | 5 | 9593987 | 9594317 |
| DMR-2109 | 5 | 9604056 | 9604498 |
| DMR-2110 | 5 | 9640953 | 9641611 |
| DMR-2111 | 5 | 9642286 | 9644636 |

|          |   |          |          |
|----------|---|----------|----------|
| DMR-2112 | 5 | 9707999  | 9708274  |
| DMR-2113 | 5 | 9712277  | 9712777  |
| DMR-2114 | 5 | 9739628  | 9740968  |
| DMR-2115 | 5 | 9741646  | 9741938  |
| DMR-2116 | 5 | 9748248  | 9748548  |
| DMR-2117 | 5 | 9750068  | 9750403  |
| DMR-2118 | 5 | 9755471  | 9757500  |
| DMR-2119 | 5 | 9757952  | 9759462  |
| DMR-2120 | 5 | 9760638  | 9761248  |
| DMR-2121 | 5 | 9840810  | 9843947  |
| DMR-2122 | 5 | 9925635  | 9926240  |
| DMR-2123 | 5 | 9929045  | 9929765  |
| DMR-2124 | 5 | 9949501  | 9953791  |
| DMR-2125 | 5 | 9980031  | 9982666  |
| DMR-2126 | 5 | 9991274  | 9991637  |
| DMR-2127 | 5 | 10049721 | 10056270 |
| DMR-2128 | 5 | 10057747 | 10058758 |
| DMR-2129 | 5 | 10059908 | 10060603 |
| DMR-2130 | 5 | 10061223 | 10063868 |
| DMR-2131 | 5 | 10075896 | 10076261 |
| DMR-2132 | 5 | 10081338 | 10083483 |
| DMR-2133 | 5 | 10085196 | 10085681 |
| DMR-2134 | 5 | 10086486 | 10086846 |
| DMR-2135 | 5 | 10100538 | 10102484 |
| DMR-2136 | 5 | 10104439 | 10106449 |
| DMR-2137 | 5 | 10116048 | 10116333 |
| DMR-2138 | 5 | 10120296 | 10121485 |
| DMR-2139 | 5 | 10123751 | 10124078 |
| DMR-2140 | 5 | 10126607 | 10127712 |
| DMR-2141 | 5 | 10147843 | 10148673 |
| DMR-2142 | 5 | 10167992 | 10173112 |
| DMR-2143 | 5 | 10182490 | 10183203 |
| DMR-2144 | 5 | 10195548 | 10196403 |
| DMR-2145 | 5 | 10204612 | 10204977 |
| DMR-2146 | 5 | 10216019 | 10219279 |
| DMR-2147 | 5 | 10223785 | 10224230 |
| DMR-2148 | 5 | 10231347 | 10233020 |
| DMR-2149 | 5 | 10235840 | 10236459 |
| DMR-2150 | 5 | 10237108 | 10237811 |
| DMR-2151 | 5 | 10240292 | 10241557 |
| DMR-2152 | 5 | 10255299 | 10261710 |
| DMR-2153 | 5 | 10265644 | 10266024 |
| DMR-2154 | 5 | 10266689 | 10267509 |
| DMR-2155 | 5 | 10267816 | 10268316 |
| DMR-2156 | 5 | 10290446 | 10291922 |
| DMR-2157 | 5 | 10309736 | 10313832 |
| DMR-2158 | 5 | 10317659 | 10318290 |

|          |   |          |          |
|----------|---|----------|----------|
| DMR-2159 | 5 | 10330862 | 10331519 |
| DMR-2160 | 5 | 10335115 | 10335498 |
| DMR-2161 | 5 | 10337767 | 10338272 |
| DMR-2162 | 5 | 10351503 | 10356268 |
| DMR-2163 | 5 | 10359252 | 10361017 |
| DMR-2164 | 5 | 10379549 | 10380204 |
| DMR-2165 | 5 | 10381174 | 10383134 |
| DMR-2166 | 5 | 10386095 | 10389078 |
| DMR-2167 | 5 | 10398185 | 10400340 |
| DMR-2168 | 5 | 10406614 | 10416616 |
| DMR-2169 | 5 | 10417277 | 10419768 |
| DMR-2170 | 5 | 10422579 | 10427035 |
| DMR-2171 | 5 | 10431850 | 10434627 |
| DMR-2172 | 5 | 10435472 | 10445005 |
| DMR-2173 | 5 | 10446350 | 10448004 |
| DMR-2174 | 5 | 10457579 | 10458069 |
| DMR-2175 | 5 | 10462047 | 10464522 |
| DMR-2176 | 5 | 10466462 | 10468945 |
| DMR-2177 | 5 | 10470245 | 10473768 |
| DMR-2178 | 5 | 10476219 | 10477066 |
| DMR-2179 | 5 | 10492035 | 10492375 |
| DMR-2180 | 5 | 10497167 | 10504586 |
| DMR-2181 | 5 | 10507265 | 10508090 |
| DMR-2182 | 5 | 10508540 | 10510202 |
| DMR-2183 | 5 | 10510858 | 10514670 |
| DMR-2184 | 5 | 10518265 | 10520930 |
| DMR-2185 | 5 | 10522256 | 10523229 |
| DMR-2186 | 5 | 10534317 | 10534618 |
| DMR-2187 | 5 | 10535263 | 10535583 |
| DMR-2188 | 5 | 10547800 | 10554452 |
| DMR-2189 | 5 | 10557587 | 10560387 |
| DMR-2190 | 5 | 10561025 | 10561697 |
| DMR-2191 | 5 | 10566484 | 10567461 |
| DMR-2192 | 5 | 10574704 | 10578175 |
| DMR-2193 | 5 | 10597148 | 10598788 |
| DMR-2194 | 5 | 10603932 | 10604942 |
| DMR-2195 | 5 | 10607867 | 10609341 |
| DMR-2196 | 5 | 10617971 | 10619123 |
| DMR-2197 | 5 | 10621218 | 10631119 |
| DMR-2198 | 5 | 10644650 | 10646802 |
| DMR-2199 | 5 | 10662528 | 10662968 |
| DMR-2200 | 5 | 10666264 | 10667270 |
| DMR-2201 | 5 | 10669253 | 10670103 |
| DMR-2202 | 5 | 10670917 | 10671873 |
| DMR-2203 | 5 | 10693369 | 10695140 |
| DMR-2204 | 5 | 10696623 | 10697616 |
| DMR-2205 | 5 | 10698626 | 10699324 |

|          |   |          |          |
|----------|---|----------|----------|
| DMR-2206 | 5 | 10708704 | 10711524 |
| DMR-2207 | 5 | 10733128 | 10733918 |
| DMR-2208 | 5 | 10738430 | 10740520 |
| DMR-2209 | 5 | 10747969 | 10748984 |
| DMR-2210 | 5 | 10750745 | 10754892 |
| DMR-2211 | 5 | 10758395 | 10759683 |
| DMR-2212 | 5 | 10774381 | 10775334 |
| DMR-2213 | 5 | 10789539 | 10790732 |
| DMR-2214 | 5 | 10793374 | 10795838 |
| DMR-2215 | 5 | 10802058 | 10802926 |
| DMR-2216 | 5 | 10805387 | 10806029 |
| DMR-2217 | 5 | 10808554 | 10813619 |
| DMR-2218 | 5 | 10823180 | 10824037 |
| DMR-2219 | 5 | 10829941 | 10833739 |
| DMR-2220 | 5 | 10834761 | 10836376 |
| DMR-2221 | 5 | 10838571 | 10839853 |
| DMR-2222 | 5 | 10846487 | 10847432 |
| DMR-2223 | 5 | 10848777 | 10851102 |
| DMR-2224 | 5 | 10853597 | 10853922 |
| DMR-2225 | 5 | 10869386 | 10873220 |
| DMR-2226 | 5 | 10884071 | 10887425 |
| DMR-2227 | 5 | 10888060 | 10888390 |
| DMR-2228 | 5 | 10889685 | 10892155 |
| DMR-2229 | 5 | 10894129 | 10895614 |
| DMR-2230 | 5 | 10898476 | 10898756 |
| DMR-2231 | 5 | 10901121 | 10906233 |
| DMR-2232 | 5 | 10911801 | 10912175 |
| DMR-2233 | 5 | 10960013 | 10961651 |
| DMR-2234 | 5 | 10963289 | 10968272 |
| DMR-2235 | 5 | 10972860 | 10985707 |
| DMR-2236 | 5 | 10988072 | 10989024 |
| DMR-2237 | 5 | 10990221 | 10991157 |
| DMR-2238 | 5 | 10992007 | 10993342 |
| DMR-2239 | 5 | 11028959 | 11029929 |
| DMR-2240 | 5 | 11034107 | 11036535 |
| DMR-2241 | 5 | 11038835 | 11040815 |
| DMR-2242 | 5 | 11041700 | 11043330 |
| DMR-2243 | 5 | 11043845 | 11045147 |
| DMR-2244 | 5 | 11046447 | 11050769 |
| DMR-2245 | 5 | 11052204 | 11053074 |
| DMR-2246 | 5 | 11055838 | 11056338 |
| DMR-2247 | 5 | 11056873 | 11063913 |
| DMR-2248 | 5 | 11068088 | 11068878 |
| DMR-2249 | 5 | 11069378 | 11070905 |
| DMR-2250 | 5 | 11087382 | 11090202 |
| DMR-2251 | 5 | 11096473 | 11096925 |
| DMR-2252 | 5 | 11097620 | 11097945 |

|          |   |          |          |
|----------|---|----------|----------|
| DMR-2253 | 5 | 11112264 | 11116251 |
| DMR-2254 | 5 | 11128156 | 11128591 |
| DMR-2255 | 5 | 11129151 | 11130581 |
| DMR-2256 | 5 | 11131066 | 11132386 |
| DMR-2257 | 5 | 11133603 | 11134093 |
| DMR-2258 | 5 | 11143339 | 11144314 |
| DMR-2259 | 5 | 11148119 | 11148744 |
| DMR-2260 | 5 | 11149444 | 11149894 |
| DMR-2261 | 5 | 11150738 | 11152208 |
| DMR-2262 | 5 | 11153718 | 11155685 |
| DMR-2263 | 5 | 11167869 | 11169709 |
| DMR-2264 | 5 | 11173369 | 11174464 |
| DMR-2265 | 5 | 11192664 | 11194276 |
| DMR-2266 | 5 | 11196449 | 11196934 |
| DMR-2267 | 5 | 11198254 | 11202694 |
| DMR-2268 | 5 | 11241164 | 11241654 |
| DMR-2269 | 5 | 11290338 | 11291448 |
| DMR-2270 | 5 | 11296625 | 11297065 |
| DMR-2271 | 5 | 11297931 | 11299063 |
| DMR-2272 | 5 | 11302176 | 11303538 |
| DMR-2273 | 5 | 11304523 | 11305822 |
| DMR-2274 | 5 | 11307617 | 11309930 |
| DMR-2275 | 5 | 11316742 | 11317407 |
| DMR-2276 | 5 | 11324012 | 11324482 |
| DMR-2277 | 5 | 11357173 | 11363551 |
| DMR-2278 | 5 | 11380927 | 11381712 |
| DMR-2279 | 5 | 11387848 | 11388634 |
| DMR-2280 | 5 | 11408293 | 11412746 |
| DMR-2281 | 5 | 11425654 | 11428787 |
| DMR-2282 | 5 | 11446424 | 11452189 |
| DMR-2283 | 5 | 11452669 | 11453159 |
| DMR-2284 | 5 | 11459273 | 11461448 |
| DMR-2285 | 5 | 11462058 | 11463398 |
| DMR-2286 | 5 | 11467885 | 11469206 |
| DMR-2287 | 5 | 11470014 | 11470472 |
| DMR-2288 | 5 | 11481530 | 11487140 |
| DMR-2289 | 5 | 11490157 | 11495718 |
| DMR-2290 | 5 | 11500833 | 11502316 |
| DMR-2291 | 5 | 11512568 | 11512883 |
| DMR-2292 | 5 | 11514222 | 11515247 |
| DMR-2293 | 5 | 11516847 | 11518490 |
| DMR-2294 | 5 | 11521513 | 11522958 |
| DMR-2295 | 5 | 11523473 | 11525597 |
| DMR-2296 | 5 | 11527937 | 11528397 |
| DMR-2297 | 5 | 11532690 | 11538617 |
| DMR-2298 | 5 | 11543238 | 11543743 |
| DMR-2299 | 5 | 11548204 | 11550169 |

|          |   |          |          |
|----------|---|----------|----------|
| DMR-2300 | 5 | 11552317 | 11553362 |
| DMR-2301 | 5 | 11553857 | 11554343 |
| DMR-2302 | 5 | 11559122 | 11563081 |
| DMR-2303 | 5 | 11567547 | 11571959 |
| DMR-2304 | 5 | 11575804 | 11576917 |
| DMR-2305 | 5 | 11582073 | 11583358 |
| DMR-2306 | 5 | 11592613 | 11593588 |
| DMR-2307 | 5 | 11609462 | 11612587 |
| DMR-2308 | 5 | 11615235 | 11616065 |
| DMR-2309 | 5 | 11623639 | 11625794 |
| DMR-2310 | 5 | 11644098 | 11646223 |
| DMR-2311 | 5 | 11647518 | 11652328 |
| DMR-2312 | 5 | 11658748 | 11659068 |
| DMR-2313 | 5 | 11661225 | 11663575 |
| DMR-2314 | 5 | 11670167 | 11672138 |
| DMR-2315 | 5 | 11673627 | 11676125 |
| DMR-2316 | 5 | 11756469 | 11757919 |
| DMR-2317 | 5 | 12014670 | 12015035 |
| DMR-2318 | 5 | 12018334 | 12019656 |
| DMR-2319 | 5 | 12083324 | 12085595 |
| DMR-2320 | 5 | 12092250 | 12092565 |
| DMR-2321 | 5 | 12114819 | 12115809 |
| DMR-2322 | 5 | 12193349 | 12194677 |
| DMR-2323 | 5 | 12200494 | 12204410 |
| DMR-2324 | 5 | 12205600 | 12206406 |
| DMR-2325 | 5 | 12207061 | 12208388 |
| DMR-2326 | 5 | 12209678 | 12211177 |
| DMR-2327 | 5 | 12213679 | 12214479 |
| DMR-2328 | 5 | 12216624 | 12216939 |
| DMR-2329 | 5 | 12226398 | 12227198 |
| DMR-2330 | 5 | 12233281 | 12237606 |
| DMR-2331 | 5 | 12239264 | 12240049 |
| DMR-2332 | 5 | 12249274 | 12253409 |
| DMR-2333 | 5 | 12264833 | 12265978 |
| DMR-2334 | 5 | 12266293 | 12266813 |
| DMR-2335 | 5 | 12267973 | 12268453 |
| DMR-2336 | 5 | 12269238 | 12274396 |
| DMR-2337 | 5 | 12280514 | 12282140 |
| DMR-2338 | 5 | 12283795 | 12288581 |
| DMR-2339 | 5 | 12290037 | 12291361 |
| DMR-2340 | 5 | 12298113 | 12301306 |
| DMR-2341 | 5 | 12322416 | 12322863 |
| DMR-2342 | 5 | 12325509 | 12326996 |
| DMR-2343 | 5 | 12342058 | 12342514 |
| DMR-2344 | 5 | 12348792 | 12349097 |
| DMR-2345 | 5 | 12349604 | 12355382 |
| DMR-2346 | 5 | 12372248 | 12372748 |

|          |   |          |          |
|----------|---|----------|----------|
| DMR-2347 | 5 | 12374678 | 12378188 |
| DMR-2348 | 5 | 12389393 | 12391030 |
| DMR-2349 | 5 | 12404259 | 12404869 |
| DMR-2350 | 5 | 12406244 | 12406904 |
| DMR-2351 | 5 | 12409052 | 12410152 |
| DMR-2352 | 5 | 12438366 | 12438696 |
| DMR-2353 | 5 | 12442216 | 12443476 |
| DMR-2354 | 5 | 12455244 | 12455524 |
| DMR-2355 | 5 | 12458552 | 12459337 |
| DMR-2356 | 5 | 12479323 | 12480328 |
| DMR-2357 | 5 | 12482138 | 12484398 |
| DMR-2358 | 5 | 12494821 | 12496276 |
| DMR-2359 | 5 | 12510194 | 12510499 |
| DMR-2360 | 5 | 12516753 | 12517068 |
| DMR-2361 | 5 | 12527671 | 12529631 |
| DMR-2362 | 5 | 12531155 | 12532310 |
| DMR-2363 | 5 | 12558048 | 12558338 |
| DMR-2364 | 5 | 12558703 | 12559483 |
| DMR-2365 | 5 | 12563496 | 12563936 |
| DMR-2366 | 5 | 12590387 | 12594512 |
| DMR-2367 | 5 | 12597134 | 12598764 |
| DMR-2368 | 5 | 12615247 | 12615747 |
| DMR-2369 | 5 | 12624492 | 12625157 |
| DMR-2370 | 5 | 12645119 | 12647972 |
| DMR-2371 | 5 | 12672331 | 12675961 |
| DMR-2372 | 5 | 12678996 | 12679276 |
| DMR-2373 | 5 | 12681765 | 12685037 |
| DMR-2374 | 5 | 12690037 | 12690322 |
| DMR-2375 | 5 | 12691337 | 12692297 |
| DMR-2376 | 5 | 12693478 | 12695123 |
| DMR-2377 | 5 | 12705392 | 12706325 |
| DMR-2378 | 5 | 12707345 | 12712264 |
| DMR-2379 | 5 | 12714601 | 12715756 |
| DMR-2380 | 5 | 12716603 | 12719203 |
| DMR-2381 | 5 | 12722334 | 12722824 |
| DMR-2382 | 5 | 12732064 | 12735236 |
| DMR-2383 | 5 | 12738226 | 12745781 |
| DMR-2384 | 5 | 12747461 | 12749075 |
| DMR-2385 | 5 | 12749944 | 12752702 |
| DMR-2386 | 5 | 12753573 | 12755493 |
| DMR-2387 | 5 | 12759006 | 12759630 |
| DMR-2388 | 5 | 12760006 | 12762950 |
| DMR-2389 | 5 | 12765909 | 12769572 |
| DMR-2390 | 5 | 12786181 | 12786896 |
| DMR-2391 | 5 | 12795152 | 12797429 |
| DMR-2392 | 5 | 12798576 | 12800044 |
| DMR-2393 | 5 | 12801876 | 12806521 |



|          |   |          |          |
|----------|---|----------|----------|
| DMR-2394 | 5 | 12811110 | 12813960 |
| DMR-2395 | 5 | 12908806 | 12909156 |
| DMR-2396 | 5 | 12910773 | 12912765 |
| DMR-2397 | 5 | 12921376 | 12922188 |
| DMR-2398 | 5 | 12923347 | 12924468 |
| DMR-2399 | 5 | 12931115 | 12931882 |
| DMR-2400 | 5 | 12933409 | 12934684 |
| DMR-2401 | 5 | 12937372 | 12940954 |
| DMR-2402 | 5 | 12944434 | 12947730 |
| DMR-2403 | 5 | 12949700 | 12951080 |
| DMR-2404 | 5 | 12966411 | 12967206 |
| DMR-2405 | 5 | 12974177 | 12975152 |
| DMR-2406 | 5 | 12976465 | 12977270 |
| DMR-2407 | 5 | 12983219 | 12984218 |
| DMR-2408 | 5 | 12992784 | 12994094 |
| DMR-2409 | 5 | 12996743 | 13006353 |
| DMR-2410 | 5 | 13007943 | 13009787 |
| DMR-2411 | 5 | 13021967 | 13025654 |
| DMR-2412 | 5 | 13030599 | 13032913 |
| DMR-2413 | 5 | 13034348 | 13034838 |
| DMR-2414 | 5 | 13044624 | 13046884 |
| DMR-2415 | 5 | 13053380 | 13056010 |
| DMR-2416 | 5 | 13078281 | 13079386 |
| DMR-2417 | 5 | 13082244 | 13082714 |
| DMR-2418 | 5 | 13108608 | 13108923 |
| DMR-2419 | 5 | 13131903 | 13134333 |
| DMR-2420 | 5 | 13143292 | 13144582 |
| DMR-2421 | 5 | 13154526 | 13155342 |
| DMR-2422 | 5 | 13156164 | 13156644 |
| DMR-2423 | 5 | 13158422 | 13158942 |
| DMR-2424 | 5 | 13166523 | 13183361 |
| DMR-2425 | 5 | 13184226 | 13186507 |
| DMR-2426 | 5 | 13198523 | 13201525 |
| DMR-2427 | 5 | 13203325 | 13204955 |
| DMR-2428 | 5 | 13205490 | 13206140 |
| DMR-2429 | 5 | 13206453 | 13212559 |
| DMR-2430 | 5 | 13244056 | 13244771 |
| DMR-2431 | 5 | 13245586 | 13245936 |
| DMR-2432 | 5 | 13246861 | 13247366 |
| DMR-2433 | 5 | 13261718 | 13264398 |
| DMR-2434 | 5 | 13265862 | 13269640 |
| DMR-2435 | 5 | 13271156 | 13277603 |
| DMR-2436 | 5 | 13289978 | 13301498 |
| DMR-2437 | 5 | 13322648 | 13323773 |
| DMR-2438 | 5 | 13332039 | 13334190 |
| DMR-2439 | 5 | 13354624 | 13354939 |
| DMR-2440 | 5 | 13361929 | 13362914 |

|          |   |          |          |
|----------|---|----------|----------|
| DMR-2441 | 5 | 13364736 | 13369487 |
| DMR-2442 | 5 | 13370620 | 13370955 |
| DMR-2443 | 5 | 13382842 | 13383212 |
| DMR-2444 | 5 | 13386488 | 13386838 |
| DMR-2445 | 5 | 13401994 | 13403161 |
| DMR-2446 | 5 | 13406313 | 13406955 |
| DMR-2447 | 5 | 13407797 | 13409582 |
| DMR-2448 | 5 | 13430385 | 13431005 |
| DMR-2449 | 5 | 13508751 | 13510039 |
| DMR-2450 | 5 | 13510531 | 13511584 |
| DMR-2451 | 5 | 13512857 | 13515327 |
| DMR-2452 | 5 | 13521924 | 13522791 |
| DMR-2453 | 5 | 13524890 | 13525715 |
| DMR-2454 | 5 | 13533199 | 13533964 |
| DMR-2455 | 5 | 13545206 | 13548491 |
| DMR-2456 | 5 | 13549016 | 13549637 |
| DMR-2457 | 5 | 13580388 | 13582360 |
| DMR-2458 | 5 | 13583684 | 13584970 |
| DMR-2459 | 5 | 13592209 | 13593709 |
| DMR-2460 | 5 | 13609582 | 13610201 |
| DMR-2461 | 5 | 13634835 | 13635281 |
| DMR-2462 | 5 | 13656931 | 13661362 |
| DMR-2463 | 5 | 13663014 | 13664665 |
| DMR-2464 | 5 | 13666130 | 13666998 |
| DMR-2465 | 5 | 13706936 | 13707871 |
| DMR-2466 | 5 | 13710204 | 13711231 |
| DMR-2467 | 5 | 13749142 | 13749967 |
| DMR-2468 | 5 | 13753476 | 13758196 |
| DMR-2469 | 5 | 13785628 | 13785933 |
| DMR-2470 | 5 | 13797308 | 13803111 |
| DMR-2471 | 5 | 13805059 | 13806068 |
| DMR-2472 | 5 | 13806603 | 13806933 |
| DMR-2473 | 5 | 13812316 | 13812826 |
| DMR-2474 | 5 | 13813636 | 13813991 |
| DMR-2475 | 5 | 13814680 | 13817763 |
| DMR-2476 | 5 | 13827874 | 13828498 |
| DMR-2477 | 5 | 13837077 | 13837791 |
| DMR-2478 | 5 | 13838944 | 13840924 |
| DMR-2479 | 5 | 13852247 | 13856729 |
| DMR-2480 | 5 | 13857529 | 13858534 |
| DMR-2481 | 5 | 13859509 | 13868947 |
| DMR-2482 | 5 | 13878051 | 13878481 |
| DMR-2483 | 5 | 13901149 | 13908033 |
| DMR-2484 | 5 | 13929365 | 13930310 |
| DMR-2485 | 5 | 13946515 | 13949105 |
| DMR-2486 | 5 | 13981010 | 13982291 |
| DMR-2487 | 5 | 13985794 | 13986619 |

|          |   |          |          |
|----------|---|----------|----------|
| DMR-2488 | 5 | 13987074 | 13987941 |
| DMR-2489 | 5 | 13997345 | 13998495 |
| DMR-2490 | 5 | 14010533 | 14017419 |
| DMR-2491 | 5 | 14043212 | 14044013 |
| DMR-2492 | 5 | 14059877 | 14061302 |
| DMR-2493 | 5 | 14062133 | 14062628 |
| DMR-2494 | 5 | 14100634 | 14107050 |
| DMR-2495 | 5 | 14115465 | 14116090 |
| DMR-2496 | 5 | 14116945 | 14117440 |
| DMR-2497 | 5 | 14130621 | 14135451 |
| DMR-2498 | 5 | 14221362 | 14226519 |
| DMR-2499 | 5 | 14246983 | 14247633 |
| DMR-2500 | 5 | 14274655 | 14275347 |
| DMR-2501 | 5 | 14297458 | 14297785 |
| DMR-2502 | 5 | 14307003 | 14307706 |
| DMR-2503 | 5 | 14312823 | 14313978 |
| DMR-2504 | 5 | 14332786 | 14334571 |
| DMR-2505 | 5 | 14337556 | 14337841 |
| DMR-2506 | 5 | 14396612 | 14398232 |
| DMR-2507 | 5 | 14427117 | 14427447 |
| DMR-2508 | 5 | 14449927 | 14450537 |
| DMR-2509 | 5 | 14453515 | 14455049 |
| DMR-2510 | 5 | 14460121 | 14466753 |
| DMR-2511 | 5 | 14509444 | 14509802 |
| DMR-2512 | 5 | 14512805 | 14514284 |
| DMR-2513 | 5 | 14519571 | 14534898 |
| DMR-2514 | 5 | 14564932 | 14566037 |
| DMR-2515 | 5 | 14574666 | 14575466 |
| DMR-2516 | 5 | 14592988 | 14595078 |
| DMR-2517 | 5 | 14671685 | 14671970 |
| DMR-2518 | 5 | 14686010 | 14687327 |
| DMR-2519 | 5 | 14719198 | 14721633 |
| DMR-2520 | 5 | 14815041 | 14815516 |
| DMR-2521 | 5 | 14816177 | 14818655 |
| DMR-2522 | 5 | 14819986 | 14820466 |
| DMR-2523 | 5 | 14843134 | 14843897 |
| DMR-2524 | 5 | 14847042 | 14848575 |
| DMR-2525 | 5 | 14850683 | 14851496 |
| DMR-2526 | 5 | 14984349 | 14984809 |
| DMR-2527 | 5 | 15092886 | 15099318 |
| DMR-2528 | 5 | 15101170 | 15102675 |
| DMR-2529 | 5 | 15144415 | 15144695 |
| DMR-2530 | 5 | 15172145 | 15172802 |
| DMR-2531 | 5 | 15250670 | 15251447 |
| DMR-2532 | 5 | 15308244 | 15309044 |
| DMR-2533 | 5 | 15367442 | 15373756 |
| DMR-2534 | 5 | 15376021 | 15377701 |

|          |   |          |          |
|----------|---|----------|----------|
| DMR-2535 | 5 | 15378228 | 15379702 |
| DMR-2536 | 5 | 15596152 | 15596502 |
| DMR-2537 | 5 | 15610335 | 15610875 |
| DMR-2538 | 5 | 15617462 | 15618571 |
| DMR-2539 | 5 | 15663492 | 15668447 |
| DMR-2540 | 5 | 15670446 | 15671106 |
| DMR-2541 | 5 | 15675047 | 15675842 |
| DMR-2542 | 5 | 15680005 | 15680800 |
| DMR-2543 | 5 | 15682932 | 15683472 |
| DMR-2544 | 5 | 15684303 | 15685093 |
| DMR-2545 | 5 | 15687245 | 15693500 |
| DMR-2546 | 5 | 15696490 | 15697125 |
| DMR-2547 | 5 | 15698105 | 15698765 |
| DMR-2548 | 5 | 15700805 | 15707179 |
| DMR-2549 | 5 | 15709981 | 15710641 |
| DMR-2550 | 5 | 15711466 | 15712131 |
| DMR-2551 | 5 | 15736222 | 15737247 |
| DMR-2552 | 5 | 15739215 | 15739555 |
| DMR-2553 | 5 | 15819093 | 15819918 |
| DMR-2554 | 5 | 15823391 | 15823866 |
| DMR-2555 | 5 | 15937735 | 15939668 |
| DMR-2556 | 5 | 15940993 | 15941493 |
| DMR-2557 | 5 | 15978772 | 15979977 |
| DMR-2558 | 5 | 16066387 | 16068885 |
| DMR-2559 | 5 | 16195309 | 16195599 |
| DMR-2560 | 5 | 16674280 | 16675285 |
| DMR-2561 | 5 | 16699048 | 16699699 |
| DMR-2562 | 5 | 16716647 | 16721438 |
| DMR-2563 | 5 | 16925220 | 16927520 |
| DMR-2564 | 5 | 16939281 | 16939583 |
| DMR-2565 | 5 | 17105759 | 17113165 |
| DMR-2566 | 5 | 17421371 | 17422066 |
| DMR-2567 | 5 | 17459022 | 17459667 |
| DMR-2568 | 5 | 17460152 | 17462942 |
| DMR-2569 | 5 | 17613965 | 17620413 |
| DMR-2570 | 5 | 17621236 | 17623160 |
| DMR-2571 | 5 | 17867526 | 17869727 |
| DMR-2572 | 5 | 17907475 | 17907800 |
| DMR-2573 | 5 | 17910760 | 17911445 |
| DMR-2574 | 5 | 17913619 | 17915420 |
| DMR-2575 | 5 | 17918396 | 17918736 |
| DMR-2576 | 5 | 17993117 | 17993642 |
| DMR-2577 | 5 | 18078620 | 18078905 |
| DMR-2578 | 5 | 18117359 | 18118329 |
| DMR-2579 | 5 | 18121482 | 18122122 |
| DMR-2580 | 5 | 18122622 | 18123624 |
| DMR-2581 | 5 | 18161903 | 18163873 |

|          |   |          |          |
|----------|---|----------|----------|
| DMR-2582 | 5 | 18210722 | 18211277 |
| DMR-2583 | 5 | 18329226 | 18329856 |
| DMR-2584 | 5 | 18488790 | 18489135 |
| DMR-2585 | 5 | 18507760 | 18512393 |
| DMR-2586 | 5 | 18667661 | 18667936 |
| DMR-2587 | 5 | 18949985 | 18956210 |
| DMR-2588 | 5 | 19375838 | 19376828 |
| DMR-2589 | 5 | 19378317 | 19379292 |
| DMR-2590 | 5 | 19471877 | 19472486 |
| DMR-2591 | 5 | 19510945 | 19511770 |
| DMR-2592 | 5 | 19514719 | 19515047 |
| DMR-2593 | 5 | 19813096 | 19813551 |
| DMR-2594 | 5 | 19982222 | 19983047 |
| DMR-2595 | 5 | 20544046 | 20544482 |
| DMR-2596 | 5 | 20611856 | 20612171 |
| DMR-2597 | 5 | 20645333 | 20645628 |
| DMR-2598 | 5 | 20646829 | 20647114 |
| DMR-2599 | 5 | 20677340 | 20677995 |
| DMR-2600 | 5 | 21391149 | 21392149 |
| DMR-2601 | 5 | 21848807 | 21854609 |
| DMR-2602 | 5 | 21951441 | 21951806 |
| DMR-2603 | 5 | 22020306 | 22022116 |
| DMR-2604 | 5 | 22022901 | 22024096 |
| DMR-2605 | 5 | 22630468 | 22635399 |
| DMR-2606 | 5 | 23152000 | 23157256 |
| DMR-2607 | 5 | 24035420 | 24035780 |
| DMR-2608 | 5 | 24036886 | 24039514 |
| DMR-2609 | 5 | 24363110 | 24363575 |
| DMR-2610 | 5 | 24662933 | 24663275 |
| DMR-2611 | 5 | 26991911 | 26992558 |

**Table S3**

| marker_id | chromosome | start_bp | stop_bp  |
|-----------|------------|----------|----------|
| MM1       | 1          | 4330606  | 4332076  |
| MM2       | 1          | 6010663  | 6013983  |
| MM3       | 1          | 6302732  | 6303012  |
| MM4       | 1          | 7430002  | 7432267  |
| MM5       | 1          | 8490901  | 8491751  |
| MM6       | 1          | 8779330  | 8780036  |
| MM7       | 1          | 8801988  | 8802650  |
| MM8       | 1          | 8816171  | 8816837  |
| MM9       | 1          | 8830699  | 8831320  |
| MM10      | 1          | 8931514  | 8932319  |
| MM11      | 1          | 9574179  | 9575333  |
| MM12      | 1          | 9928550  | 9929215  |
| MM13      | 1          | 10357405 | 10358870 |
| MM14      | 1          | 10545345 | 10545839 |
| MM15      | 1          | 11044649 | 11045616 |
| MM16      | 1          | 11047114 | 11051415 |
| MM17      | 1          | 11096911 | 11100708 |
| MM18      | 1          | 11102419 | 11102716 |
| MM19      | 1          | 11309661 | 11310311 |
| MM20      | 1          | 11322798 | 11324178 |
| MM21      | 1          | 11502846 | 11503351 |
| MM22      | 1          | 11511756 | 11512571 |
| MM23      | 1          | 11517887 | 11518652 |
| MM24      | 1          | 11519343 | 11519828 |
| MM25      | 1          | 12273252 | 12276332 |
| MM26      | 1          | 12315004 | 12316774 |
| MM27      | 1          | 12403422 | 12409842 |
| MM28      | 1          | 12665781 | 12666246 |
| MM29      | 1          | 12741147 | 12741472 |
| MM30      | 1          | 12856990 | 12862085 |
| MM31      | 1          | 12886199 | 12886839 |
| MM32      | 1          | 12997426 | 13001226 |
| MM33      | 1          | 13003181 | 13008641 |
| MM34      | 1          | 13018502 | 13019187 |
| MM35      | 1          | 13021477 | 13023341 |
| MM36      | 1          | 13098250 | 13102655 |
| MM37      | 1          | 13239811 | 13242134 |
| MM38      | 1          | 13264736 | 13265031 |
| MM39      | 1          | 13329072 | 13340087 |
| MM40      | 1          | 13340457 | 13340972 |
| MM41      | 1          | 13391912 | 13397522 |
| MM42      | 1          | 13410597 | 13416544 |
| MM43      | 1          | 13419144 | 13422650 |

|      |   |          |          |
|------|---|----------|----------|
| MM44 | 1 | 13427752 | 13429697 |
| MM45 | 1 | 13433353 | 13434184 |
| MM46 | 1 | 13491291 | 13491906 |
| MM47 | 1 | 13499704 | 13500341 |
| MM48 | 1 | 13502344 | 13502970 |
| MM49 | 1 | 13561188 | 13566504 |
| MM50 | 1 | 13609050 | 13611740 |
| MM51 | 1 | 13614690 | 13616505 |
| MM52 | 1 | 13618483 | 13621742 |
| MM53 | 1 | 13680349 | 13682839 |
| MM54 | 1 | 13690605 | 13696354 |
| MM55 | 1 | 13723276 | 13726066 |
| MM56 | 1 | 13780371 | 13780806 |
| MM57 | 1 | 13826895 | 13828486 |
| MM58 | 1 | 13833771 | 13837234 |
| MM59 | 1 | 13874905 | 13878010 |
| MM60 | 1 | 13949477 | 13950282 |
| MM61 | 1 | 13956862 | 13960687 |
| MM62 | 1 | 13969593 | 13972424 |
| MM63 | 1 | 13983607 | 13984268 |
| MM64 | 1 | 13984918 | 13985273 |
| MM65 | 1 | 14021704 | 14022069 |
| MM66 | 1 | 14037747 | 14039365 |
| MM67 | 1 | 14041565 | 14044311 |
| MM68 | 1 | 14052579 | 14054259 |
| MM69 | 1 | 14055047 | 14061305 |
| MM70 | 1 | 14083297 | 14084617 |
| MM71 | 1 | 14131943 | 14137208 |
| MM72 | 1 | 14146506 | 14147761 |
| MM73 | 1 | 14302730 | 14306046 |
| MM74 | 1 | 14335079 | 14335886 |
| MM75 | 1 | 14541178 | 14545088 |
| MM76 | 1 | 15284161 | 15284806 |
| MM77 | 1 | 15308042 | 15308542 |
| MM78 | 1 | 15309072 | 15309419 |
| MM79 | 1 | 15388250 | 15388769 |
| MM80 | 1 | 15406219 | 15406584 |
| MM81 | 1 | 15528192 | 15531620 |
| MM82 | 1 | 15550286 | 15550766 |
| MM83 | 1 | 15551291 | 15552086 |
| MM84 | 1 | 15582994 | 15587070 |
| MM85 | 1 | 15620432 | 15625706 |
| MM86 | 1 | 15628145 | 15632000 |
| MM87 | 1 | 15689530 | 15690065 |
| MM88 | 1 | 15748293 | 15748923 |
| MM89 | 1 | 15815259 | 15817608 |
| MM90 | 1 | 15881127 | 15881601 |

|       |   |          |          |
|-------|---|----------|----------|
| MM91  | 1 | 15911298 | 15911993 |
| MM92  | 1 | 15952423 | 15953198 |
| MM93  | 1 | 16042016 | 16046253 |
| MM94  | 1 | 16073021 | 16075146 |
| MM95  | 1 | 16077497 | 16079431 |
| MM96  | 1 | 16109836 | 16111806 |
| MM97  | 1 | 16174849 | 16176279 |
| MM98  | 1 | 16179459 | 16183728 |
| MM99  | 1 | 16241631 | 16242456 |
| MM100 | 1 | 16321198 | 16321833 |
| MM101 | 1 | 16372020 | 16377961 |
| MM102 | 1 | 16378251 | 16379910 |
| MM103 | 1 | 16393296 | 16393971 |
| MM104 | 1 | 16492119 | 16494454 |
| MM105 | 1 | 16503303 | 16510446 |
| MM106 | 1 | 16532567 | 16536974 |
| MM107 | 1 | 16554298 | 16559608 |
| MM108 | 1 | 16567689 | 16568185 |
| MM109 | 1 | 16571345 | 16577420 |
| MM110 | 1 | 16583872 | 16585347 |
| MM111 | 1 | 16662920 | 16665717 |
| MM112 | 1 | 16680244 | 16684809 |
| MM113 | 1 | 16695209 | 16700209 |
| MM114 | 1 | 16718975 | 16720795 |
| MM115 | 1 | 16733536 | 16733986 |
| MM116 | 1 | 16734832 | 16739267 |
| MM117 | 1 | 16848979 | 16849677 |
| MM118 | 1 | 16855805 | 16857585 |
| MM119 | 1 | 16858275 | 16860405 |
| MM120 | 1 | 17025691 | 17031861 |
| MM121 | 1 | 17242364 | 17243167 |
| MM122 | 1 | 17257708 | 17258178 |
| MM123 | 1 | 17258838 | 17264340 |
| MM124 | 1 | 17265653 | 17266923 |
| MM125 | 1 | 17284412 | 17285075 |
| MM126 | 1 | 17363118 | 17368434 |
| MM127 | 1 | 17491702 | 17492657 |
| MM128 | 1 | 17523013 | 17526003 |
| MM129 | 1 | 17536099 | 17536719 |
| MM130 | 1 | 17624374 | 17624644 |
| MM131 | 1 | 17627467 | 17629817 |
| MM132 | 1 | 17671709 | 17675959 |
| MM133 | 1 | 17678326 | 17685879 |
| MM134 | 1 | 18093468 | 18093752 |
| MM135 | 1 | 18217549 | 18218148 |
| MM136 | 1 | 18966470 | 18967584 |
| MM137 | 1 | 18968104 | 18968769 |



|       |   |          |          |
|-------|---|----------|----------|
| MM138 | 1 | 18969287 | 18970411 |
| MM139 | 1 | 18971211 | 18972691 |
| MM140 | 1 | 19599419 | 19600065 |
| MM141 | 1 | 19602225 | 19603333 |
| MM142 | 1 | 19709973 | 19710245 |
| MM143 | 1 | 20088798 | 20093878 |
| MM144 | 1 | 20319443 | 20320248 |
| MM145 | 1 | 20337631 | 20338751 |
| MM146 | 1 | 21022509 | 21022839 |
| MM147 | 1 | 21457161 | 21459296 |
| MM148 | 1 | 21459776 | 21460452 |
| MM149 | 1 | 21695576 | 21696186 |
| MM150 | 1 | 21750810 | 21758234 |
| MM151 | 1 | 21759069 | 21761386 |
| MM152 | 1 | 21779239 | 21780706 |
| MM153 | 1 | 21801669 | 21802299 |
| MM154 | 1 | 21815497 | 21816819 |
| MM155 | 1 | 21837927 | 21838792 |
| MM156 | 1 | 21851635 | 21853262 |
| MM157 | 1 | 22234806 | 22236246 |
| MM158 | 1 | 23570478 | 23572928 |
| MM159 | 1 | 24432541 | 24433101 |
| MM160 | 1 | 24459659 | 24460449 |
| MM161 | 1 | 24670998 | 24671353 |
| MM162 | 1 | 26200063 | 26200847 |
| MM163 | 1 | 27070457 | 27071391 |
| MM164 | 1 | 28707900 | 28708696 |
| MM165 | 1 | 28998776 | 28999419 |
| MM166 | 2 | 245700   | 249332   |
| MM167 | 2 | 373127   | 378679   |
| MM168 | 2 | 930664   | 930979   |
| MM169 | 2 | 1198126  | 1198622  |
| MM170 | 2 | 1227799  | 1231951  |
| MM171 | 2 | 1251574  | 1252848  |
| MM172 | 2 | 1326824  | 1327598  |
| MM173 | 2 | 1401845  | 1402997  |
| MM174 | 2 | 1469377  | 1469822  |
| MM175 | 2 | 1485511  | 1488641  |
| MM176 | 2 | 1490016  | 1490456  |
| MM177 | 2 | 1665553  | 1668318  |
| MM178 | 2 | 1781534  | 1782394  |
| MM179 | 2 | 1783524  | 1787124  |
| MM180 | 2 | 1828697  | 1836838  |
| MM181 | 2 | 1885678  | 1886283  |
| MM182 | 2 | 1906578  | 1912199  |
| MM183 | 2 | 1944372  | 1946238  |
| MM184 | 2 | 1949643  | 1953330  |

|       |   |         |         |
|-------|---|---------|---------|
| MM185 | 2 | 1956620 | 1958940 |
| MM186 | 2 | 1970651 | 1974556 |
| MM187 | 2 | 2031037 | 2031871 |
| MM188 | 2 | 2036129 | 2041384 |
| MM189 | 2 | 2075543 | 2080503 |
| MM190 | 2 | 2089615 | 2092240 |
| MM191 | 2 | 2093085 | 2094872 |
| MM192 | 2 | 2098311 | 2101640 |
| MM193 | 2 | 2102270 | 2102605 |
| MM194 | 2 | 2107257 | 2109372 |
| MM195 | 2 | 2168983 | 2170432 |
| MM196 | 2 | 2205113 | 2206099 |
| MM197 | 2 | 2263184 | 2264626 |
| MM198 | 2 | 2293691 | 2295652 |
| MM199 | 2 | 2365305 | 2370917 |
| MM200 | 2 | 2373250 | 2373893 |
| MM201 | 2 | 2390901 | 2395673 |
| MM202 | 2 | 2414809 | 2417754 |
| MM203 | 2 | 2475369 | 2483949 |
| MM204 | 2 | 2526197 | 2529458 |
| MM205 | 2 | 2534900 | 2535230 |
| MM206 | 2 | 2594011 | 2597826 |
| MM207 | 2 | 2625665 | 2627800 |
| MM208 | 2 | 2631790 | 2634105 |
| MM209 | 2 | 2649242 | 2651942 |
| MM210 | 2 | 2660192 | 2662657 |
| MM211 | 2 | 2694995 | 2695794 |
| MM212 | 2 | 2704358 | 2706366 |
| MM213 | 2 | 2709500 | 2711941 |
| MM214 | 2 | 2724540 | 2727810 |
| MM215 | 2 | 2739723 | 2742328 |
| MM216 | 2 | 2747969 | 2754895 |
| MM217 | 2 | 2781904 | 2785919 |
| MM218 | 2 | 2834244 | 2836894 |
| MM219 | 2 | 2844963 | 2849723 |
| MM220 | 2 | 2883554 | 2887211 |
| MM221 | 2 | 2908131 | 2911267 |
| MM222 | 2 | 2916439 | 2917749 |
| MM223 | 2 | 2943664 | 2943969 |
| MM224 | 2 | 2969042 | 2973142 |
| MM225 | 2 | 2995907 | 2997947 |
| MM226 | 2 | 3025667 | 3028583 |
| MM227 | 2 | 3044295 | 3045090 |
| MM228 | 2 | 3107993 | 3109458 |
| MM229 | 2 | 3160083 | 3166217 |
| MM230 | 2 | 3171525 | 3173945 |
| MM231 | 2 | 3175617 | 3179447 |

|       |   |         |         |
|-------|---|---------|---------|
| MM232 | 2 | 3204341 | 3206116 |
| MM233 | 2 | 3231426 | 3237483 |
| MM234 | 2 | 3258618 | 3259576 |
| MM235 | 2 | 3517313 | 3522464 |
| MM236 | 2 | 3575941 | 3577261 |
| MM237 | 2 | 3593550 | 3594530 |
| MM238 | 2 | 3694187 | 3699137 |
| MM239 | 2 | 3708543 | 3709532 |
| MM240 | 2 | 3730709 | 3734122 |
| MM241 | 2 | 3760229 | 3761179 |
| MM242 | 2 | 3796541 | 3797346 |
| MM243 | 2 | 3806565 | 3806943 |
| MM244 | 2 | 3809379 | 3810738 |
| MM245 | 2 | 3930500 | 3932810 |
| MM246 | 2 | 3946163 | 3949501 |
| MM247 | 2 | 3950471 | 3951286 |
| MM248 | 2 | 3966794 | 3968787 |
| MM249 | 2 | 3985597 | 3986917 |
| MM250 | 2 | 4019793 | 4023584 |
| MM251 | 2 | 4024079 | 4025709 |
| MM252 | 2 | 4068137 | 4072757 |
| MM253 | 2 | 4073370 | 4074222 |
| MM254 | 2 | 4096636 | 4098118 |
| MM255 | 2 | 4099158 | 4103448 |
| MM256 | 2 | 4117083 | 4127012 |
| MM257 | 2 | 4233904 | 4243647 |
| MM258 | 2 | 4251452 | 4252084 |
| MM259 | 2 | 4253414 | 4253709 |
| MM260 | 2 | 4255076 | 4256068 |
| MM261 | 2 | 4258216 | 4260323 |
| MM262 | 2 | 4265789 | 4268889 |
| MM263 | 2 | 4283957 | 4289392 |
| MM264 | 2 | 4300231 | 4301118 |
| MM265 | 2 | 4330654 | 4332079 |
| MM266 | 2 | 4395965 | 4397775 |
| MM267 | 2 | 4467379 | 4468559 |
| MM268 | 2 | 4475957 | 4477492 |
| MM269 | 2 | 4493012 | 4494987 |
| MM270 | 2 | 4508511 | 4509821 |
| MM271 | 2 | 4573697 | 4574192 |
| MM272 | 2 | 4590359 | 4592466 |
| MM273 | 2 | 4651574 | 4656324 |
| MM274 | 2 | 4667899 | 4669564 |
| MM275 | 2 | 4671171 | 4675645 |
| MM276 | 2 | 4699863 | 4700193 |
| MM277 | 2 | 4707170 | 4710941 |
| MM278 | 2 | 4715743 | 4716393 |

|       |   |         |         |
|-------|---|---------|---------|
| MM279 | 2 | 4746911 | 4747216 |
| MM280 | 2 | 4798413 | 4799877 |
| MM281 | 2 | 4816409 | 4824622 |
| MM282 | 2 | 4825317 | 4828747 |
| MM283 | 2 | 4829117 | 4833409 |
| MM284 | 2 | 4837036 | 4838525 |
| MM285 | 2 | 4842797 | 4844132 |
| MM286 | 2 | 4868225 | 4868702 |
| MM287 | 2 | 4901685 | 4905985 |
| MM288 | 2 | 4926280 | 4927745 |
| MM289 | 2 | 4974484 | 4977779 |
| MM290 | 2 | 4978274 | 4979538 |
| MM291 | 2 | 5001007 | 5001352 |
| MM292 | 2 | 5022134 | 5023985 |
| MM293 | 2 | 5031903 | 5034043 |
| MM294 | 2 | 5041137 | 5044059 |
| MM295 | 2 | 5069490 | 5074931 |
| MM296 | 2 | 5081047 | 5081402 |
| MM297 | 2 | 5081732 | 5082012 |
| MM298 | 2 | 5082392 | 5082827 |
| MM299 | 2 | 5083677 | 5086973 |
| MM300 | 2 | 5178526 | 5179696 |
| MM301 | 2 | 5180836 | 5185459 |
| MM302 | 2 | 5224127 | 5225413 |
| MM303 | 2 | 5246735 | 5252667 |
| MM304 | 2 | 5287758 | 5288603 |
| MM305 | 2 | 5294867 | 5295382 |
| MM306 | 2 | 5296067 | 5298812 |
| MM307 | 2 | 5303949 | 5304949 |
| MM308 | 2 | 5305476 | 5306594 |
| MM309 | 2 | 5307779 | 5312901 |
| MM310 | 2 | 5313356 | 5313891 |
| MM311 | 2 | 5331180 | 5333627 |
| MM312 | 2 | 5388300 | 5392536 |
| MM313 | 2 | 5393698 | 5395343 |
| MM314 | 2 | 5411065 | 5413051 |
| MM315 | 2 | 5418788 | 5423063 |
| MM316 | 2 | 5469133 | 5470783 |
| MM317 | 2 | 5477871 | 5478696 |
| MM318 | 2 | 5479201 | 5479856 |
| MM319 | 2 | 5482668 | 5485614 |
| MM320 | 2 | 5503799 | 5505724 |
| MM321 | 2 | 5524264 | 5526363 |
| MM322 | 2 | 5609728 | 5612998 |
| MM323 | 2 | 5620955 | 5638234 |
| MM324 | 2 | 5672931 | 5675838 |
| MM325 | 2 | 5717424 | 5723216 |

|       |   |         |         |
|-------|---|---------|---------|
| MM326 | 2 | 5725548 | 5726670 |
| MM327 | 2 | 5737238 | 5738103 |
| MM328 | 2 | 5799639 | 5804892 |
| MM329 | 2 | 5836440 | 5837900 |
| MM330 | 2 | 5859874 | 5864604 |
| MM331 | 2 | 5907512 | 5908713 |
| MM332 | 2 | 5952108 | 5953203 |
| MM333 | 2 | 6016231 | 6020356 |
| MM334 | 2 | 6112653 | 6114906 |
| MM335 | 2 | 6116421 | 6119529 |
| MM336 | 2 | 6141480 | 6146148 |
| MM337 | 2 | 6204002 | 6206334 |
| MM338 | 2 | 6263910 | 6268205 |
| MM339 | 2 | 6358149 | 6360646 |
| MM340 | 2 | 6427640 | 6434345 |
| MM341 | 2 | 6440446 | 6447922 |
| MM342 | 2 | 6497412 | 6497752 |
| MM343 | 2 | 6557162 | 6558127 |
| MM344 | 2 | 6560592 | 6561729 |
| MM345 | 2 | 6562407 | 6565398 |
| MM346 | 2 | 6587142 | 6589792 |
| MM347 | 2 | 6595097 | 6598396 |
| MM348 | 2 | 6631522 | 6633512 |
| MM349 | 2 | 6707645 | 6713853 |
| MM350 | 2 | 6726895 | 6727440 |
| MM351 | 2 | 6743447 | 6743923 |
| MM352 | 2 | 6774793 | 6779739 |
| MM353 | 2 | 6790136 | 6793881 |
| MM354 | 2 | 6849039 | 6849668 |
| MM355 | 2 | 6918509 | 6921589 |
| MM356 | 2 | 6942754 | 6946037 |
| MM357 | 2 | 6961080 | 6965815 |
| MM358 | 2 | 6969126 | 6969961 |
| MM359 | 2 | 6971106 | 6973066 |
| MM360 | 2 | 6973906 | 6974221 |
| MM361 | 2 | 6976261 | 6977253 |
| MM362 | 2 | 7012361 | 7016029 |
| MM363 | 2 | 7120145 | 7121430 |
| MM364 | 2 | 7122775 | 7123116 |
| MM365 | 2 | 7231001 | 7231331 |
| MM366 | 2 | 7232302 | 7232947 |
| MM367 | 2 | 7233467 | 7236245 |
| MM368 | 2 | 7239770 | 7245205 |
| MM369 | 2 | 7455569 | 7459679 |
| MM370 | 2 | 7460204 | 7461136 |
| MM371 | 2 | 7544676 | 7545673 |
| MM372 | 2 | 7784246 | 7791011 |

|       |   |          |          |
|-------|---|----------|----------|
| MM373 | 2 | 8278256  | 8281520  |
| MM374 | 2 | 8568345  | 8571152  |
| MM375 | 2 | 8572927  | 8574117  |
| MM376 | 2 | 8824215  | 8827670  |
| MM377 | 2 | 8881486  | 8882476  |
| MM378 | 2 | 9129123  | 9130835  |
| MM379 | 2 | 9194501  | 9198421  |
| MM380 | 2 | 9659660  | 9659972  |
| MM381 | 2 | 10415627 | 10417647 |
| MM382 | 2 | 10540595 | 10541195 |
| MM383 | 2 | 12456566 | 12461464 |
| MM384 | 2 | 12664247 | 12665092 |
| MM385 | 2 | 12743505 | 12743777 |
| MM386 | 2 | 13167389 | 13167885 |
| MM387 | 2 | 14560785 | 14561251 |
| MM388 | 2 | 15418592 | 15418927 |
| MM389 | 2 | 16028930 | 16029320 |
| MM390 | 2 | 17099658 | 17102643 |
| MM391 | 2 | 19381131 | 19381454 |
| MM392 | 3 | 129256   | 129877   |
| MM393 | 3 | 2817878  | 2818698  |
| MM394 | 3 | 3812048  | 3813004  |
| MM395 | 3 | 5839552  | 5840347  |
| MM396 | 3 | 7061219  | 7061849  |
| MM397 | 3 | 7343551  | 7344491  |
| MM398 | 3 | 7738889  | 7739204  |
| MM399 | 3 | 8937125  | 8938547  |
| MM400 | 3 | 9228167  | 9232640  |
| MM401 | 3 | 9238084  | 9242146  |
| MM402 | 3 | 9436406  | 9439321  |
| MM403 | 3 | 9445436  | 9447571  |
| MM404 | 3 | 9472325  | 9473025  |
| MM405 | 3 | 9693424  | 9699210  |
| MM406 | 3 | 10560373 | 10561358 |
| MM407 | 3 | 10562023 | 10563840 |
| MM408 | 3 | 10886897 | 10890032 |
| MM409 | 3 | 10918937 | 10922352 |
| MM410 | 3 | 11020413 | 11022008 |
| MM411 | 3 | 11029136 | 11030146 |
| MM412 | 3 | 11066720 | 11068910 |
| MM413 | 3 | 11113628 | 11114288 |
| MM414 | 3 | 11117372 | 11121888 |
| MM415 | 3 | 11172354 | 11176989 |
| MM416 | 3 | 11366256 | 11367206 |
| MM417 | 3 | 11391168 | 11391633 |
| MM418 | 3 | 11393148 | 11396743 |
| MM419 | 3 | 11455024 | 11455831 |

|       |   |          |          |
|-------|---|----------|----------|
| MM420 | 3 | 11525478 | 11526303 |
| MM421 | 3 | 11558589 | 11562240 |
| MM422 | 3 | 11575310 | 11578712 |
| MM423 | 3 | 11579762 | 11588650 |
| MM424 | 3 | 11666181 | 11672933 |
| MM425 | 3 | 11699832 | 11704447 |
| MM426 | 3 | 11745751 | 11746215 |
| MM427 | 3 | 11797070 | 11799048 |
| MM428 | 3 | 11880839 | 11884014 |
| MM429 | 3 | 11935156 | 11936166 |
| MM430 | 3 | 12021293 | 12029659 |
| MM431 | 3 | 12047659 | 12048799 |
| MM432 | 3 | 12096151 | 12098525 |
| MM433 | 3 | 12162834 | 12165482 |
| MM434 | 3 | 12272931 | 12277004 |
| MM435 | 3 | 12294330 | 12294685 |
| MM436 | 3 | 12295346 | 12296152 |
| MM437 | 3 | 12380977 | 12381767 |
| MM438 | 3 | 12388866 | 12390186 |
| MM439 | 3 | 12447782 | 12448817 |
| MM440 | 3 | 12460968 | 12462013 |
| MM441 | 3 | 12577849 | 12580766 |
| MM442 | 3 | 12581941 | 12582944 |
| MM443 | 3 | 12586049 | 12591679 |
| MM444 | 3 | 12647261 | 12651758 |
| MM445 | 3 | 12652230 | 12655856 |
| MM446 | 3 | 12678334 | 12683741 |
| MM447 | 3 | 12688006 | 12695431 |
| MM448 | 3 | 12695949 | 12697920 |
| MM449 | 3 | 12764453 | 12768208 |
| MM450 | 3 | 12847074 | 12848885 |
| MM451 | 3 | 12853053 | 12855696 |
| MM452 | 3 | 12923506 | 12927756 |
| MM453 | 3 | 12944150 | 12944810 |
| MM454 | 3 | 12945415 | 12947612 |
| MM455 | 3 | 12957323 | 12958478 |
| MM456 | 3 | 13057312 | 13062284 |
| MM457 | 3 | 13081898 | 13084214 |
| MM458 | 3 | 13093967 | 13094572 |
| MM459 | 3 | 13108803 | 13117520 |
| MM460 | 3 | 13213922 | 13214362 |
| MM461 | 3 | 13286031 | 13290116 |
| MM462 | 3 | 13290796 | 13291621 |
| MM463 | 3 | 13322273 | 13328224 |
| MM464 | 3 | 13475436 | 13476916 |
| MM465 | 3 | 13506800 | 13509261 |
| MM466 | 3 | 13667971 | 13671251 |

|       |   |          |          |
|-------|---|----------|----------|
| MM467 | 3 | 13895479 | 13895984 |
| MM468 | 3 | 13896504 | 13897139 |
| MM469 | 3 | 13897484 | 13901747 |
| MM470 | 3 | 13971420 | 13974717 |
| MM471 | 3 | 14070896 | 14073390 |
| MM472 | 3 | 14121396 | 14124831 |
| MM473 | 3 | 14131118 | 14137431 |
| MM474 | 3 | 14284059 | 14285081 |
| MM475 | 3 | 14301251 | 14304902 |
| MM476 | 3 | 14313483 | 14313918 |
| MM477 | 3 | 14343997 | 14344772 |
| MM478 | 3 | 14399257 | 14399779 |
| MM479 | 3 | 14548759 | 14551905 |
| MM480 | 3 | 14667560 | 14673640 |
| MM481 | 3 | 14676808 | 14680438 |
| MM482 | 3 | 14740336 | 14746244 |
| MM483 | 3 | 14777134 | 14777949 |
| MM484 | 3 | 14787961 | 14791591 |
| MM485 | 3 | 14796551 | 14798535 |
| MM486 | 3 | 14818004 | 14818664 |
| MM487 | 3 | 14848874 | 14852534 |
| MM488 | 3 | 14878239 | 14881022 |
| MM489 | 3 | 14881724 | 14888146 |
| MM490 | 3 | 14942954 | 14950054 |
| MM491 | 3 | 15004668 | 15008930 |
| MM492 | 3 | 15035304 | 15036954 |
| MM493 | 3 | 15056632 | 15058450 |
| MM494 | 3 | 15073311 | 15079193 |
| MM495 | 3 | 15186655 | 15188455 |
| MM496 | 3 | 15240769 | 15243372 |
| MM497 | 3 | 15277212 | 15280347 |
| MM498 | 3 | 15295233 | 15297204 |
| MM499 | 3 | 15318785 | 15325698 |
| MM500 | 3 | 15327024 | 15328679 |
| MM501 | 3 | 15356271 | 15356561 |
| MM502 | 3 | 15370474 | 15372602 |
| MM503 | 3 | 15409187 | 15412489 |
| MM504 | 3 | 15456900 | 15458380 |
| MM505 | 3 | 15498185 | 15502945 |
| MM506 | 3 | 15506242 | 15509027 |
| MM507 | 3 | 15536092 | 15537447 |
| MM508 | 3 | 15537727 | 15541865 |
| MM509 | 3 | 15581951 | 15584422 |
| MM510 | 3 | 15586908 | 15587939 |
| MM511 | 3 | 15594323 | 15594818 |
| MM512 | 3 | 15596493 | 15596958 |
| MM513 | 3 | 15597453 | 15597842 |



|       |   |          |          |
|-------|---|----------|----------|
| MM514 | 3 | 15602095 | 15607554 |
| MM515 | 3 | 15632482 | 15638053 |
| MM516 | 3 | 15698277 | 15702423 |
| MM517 | 3 | 15733942 | 15739352 |
| MM518 | 3 | 15819730 | 15821536 |
| MM519 | 3 | 15839404 | 15840499 |
| MM520 | 3 | 15858854 | 15865246 |
| MM521 | 3 | 15872239 | 15873997 |
| MM522 | 3 | 15931106 | 15934929 |
| MM523 | 3 | 15970710 | 15972725 |
| MM524 | 3 | 15973325 | 15974977 |
| MM525 | 3 | 16008020 | 16009675 |
| MM526 | 3 | 16083738 | 16084065 |
| MM527 | 3 | 16184523 | 16191125 |
| MM528 | 3 | 16256031 | 16256361 |
| MM529 | 3 | 16257166 | 16260312 |
| MM530 | 3 | 16304478 | 16305033 |
| MM531 | 3 | 16508925 | 16509440 |
| MM532 | 3 | 16538652 | 16539938 |
| MM533 | 3 | 16602315 | 16604798 |
| MM534 | 3 | 16605830 | 16607125 |
| MM535 | 3 | 16613420 | 16615397 |
| MM536 | 3 | 16702155 | 16709225 |
| MM537 | 3 | 16821132 | 16825096 |
| MM538 | 3 | 16858218 | 16860083 |
| MM539 | 3 | 16968323 | 16971958 |
| MM540 | 3 | 16973403 | 16973908 |
| MM541 | 3 | 17158060 | 17158394 |
| MM542 | 3 | 17989312 | 17996417 |
| MM543 | 3 | 18080249 | 18081216 |
| MM544 | 3 | 18370976 | 18371431 |
| MM545 | 3 | 22124026 | 22124532 |
| MM546 | 3 | 22243503 | 22246468 |
| MM547 | 3 | 23215509 | 23218355 |
| MM548 | 4 | 248703   | 249488   |
| MM549 | 4 | 633119   | 636937   |
| MM550 | 4 | 788271   | 788751   |
| MM551 | 4 | 1312610  | 1315610  |
| MM552 | 4 | 1447714  | 1448102  |
| MM553 | 4 | 1592613  | 1594726  |
| MM554 | 4 | 1647079  | 1650360  |
| MM555 | 4 | 1789984  | 1791244  |
| MM556 | 4 | 1792739  | 1794717  |
| MM557 | 4 | 1820123  | 1823150  |
| MM558 | 4 | 1836482  | 1837117  |
| MM559 | 4 | 1846186  | 1847676  |
| MM560 | 4 | 1848556  | 1850185  |

|       |   |         |         |
|-------|---|---------|---------|
| MM561 | 4 | 1856114 | 1856584 |
| MM562 | 4 | 1857244 | 1859444 |
| MM563 | 4 | 1922637 | 1924607 |
| MM564 | 4 | 1961217 | 1961702 |
| MM565 | 4 | 1968459 | 1973961 |
| MM566 | 4 | 1976874 | 1979234 |
| MM567 | 4 | 1987439 | 1993922 |
| MM568 | 4 | 1996722 | 1997328 |
| MM569 | 4 | 2046033 | 2048209 |
| MM570 | 4 | 2064710 | 2069637 |
| MM571 | 4 | 2107230 | 2110519 |
| MM572 | 4 | 2136479 | 2143881 |
| MM573 | 4 | 2171105 | 2175733 |
| MM574 | 4 | 2176043 | 2177404 |
| MM575 | 4 | 2178034 | 2179053 |
| MM576 | 4 | 2188113 | 2203742 |
| MM577 | 4 | 2205950 | 2208691 |
| MM578 | 4 | 2212028 | 2214798 |
| MM579 | 4 | 2250134 | 2252125 |
| MM580 | 4 | 2254091 | 2256545 |
| MM581 | 4 | 2263009 | 2264516 |
| MM582 | 4 | 2279834 | 2288764 |
| MM583 | 4 | 2302576 | 2308022 |
| MM584 | 4 | 2309384 | 2310726 |
| MM585 | 4 | 2355263 | 2355598 |
| MM586 | 4 | 2356046 | 2357721 |
| MM587 | 4 | 2596832 | 2603097 |
| MM588 | 4 | 2899556 | 2904543 |
| MM589 | 4 | 2982274 | 2983224 |
| MM590 | 4 | 2983754 | 2985514 |
| MM591 | 4 | 3129448 | 3130223 |
| MM592 | 4 | 3138800 | 3145420 |
| MM593 | 4 | 3292909 | 3299374 |
| MM594 | 4 | 3301512 | 3308118 |
| MM595 | 4 | 3330408 | 3331687 |
| MM596 | 4 | 3360614 | 3361429 |
| MM597 | 4 | 3364190 | 3366030 |
| MM598 | 4 | 3367340 | 3369655 |
| MM599 | 4 | 3370683 | 3371328 |
| MM600 | 4 | 3405807 | 3408122 |
| MM601 | 4 | 3417186 | 3418862 |
| MM602 | 4 | 3422432 | 3423107 |
| MM603 | 4 | 3423627 | 3427223 |
| MM604 | 4 | 3448202 | 3451852 |
| MM605 | 4 | 3476097 | 3480542 |
| MM606 | 4 | 3503945 | 3505655 |
| MM607 | 4 | 3522800 | 3524570 |

|       |   |         |         |
|-------|---|---------|---------|
| MM608 | 4 | 3525396 | 3527433 |
| MM609 | 4 | 3533867 | 3536281 |
| MM610 | 4 | 3640781 | 3647018 |
| MM611 | 4 | 3647858 | 3649143 |
| MM612 | 4 | 3652663 | 3653605 |
| MM613 | 4 | 3683359 | 3683960 |
| MM614 | 4 | 3685475 | 3689756 |
| MM615 | 4 | 3707081 | 3715518 |
| MM616 | 4 | 3719963 | 3722449 |
| MM617 | 4 | 3726918 | 3727888 |
| MM618 | 4 | 3754128 | 3756927 |
| MM619 | 4 | 3795890 | 3797500 |
| MM620 | 4 | 3880354 | 3883009 |
| MM621 | 4 | 3883829 | 3885754 |
| MM622 | 4 | 3913026 | 3913536 |
| MM623 | 4 | 3920752 | 3921447 |
| MM624 | 4 | 3921727 | 3922552 |
| MM625 | 4 | 4250264 | 4252431 |
| MM626 | 4 | 4267401 | 4268226 |
| MM627 | 4 | 4319094 | 4320859 |
| MM628 | 4 | 4345663 | 4346146 |
| MM629 | 4 | 4358332 | 4359964 |
| MM630 | 4 | 4394491 | 4400778 |
| MM631 | 4 | 4539542 | 4540007 |
| MM632 | 4 | 4590672 | 4594634 |
| MM633 | 4 | 4606661 | 4608185 |
| MM634 | 4 | 4611100 | 4612759 |
| MM635 | 4 | 4613461 | 4614391 |
| MM636 | 4 | 4623691 | 4627766 |
| MM637 | 4 | 4628919 | 4633706 |
| MM638 | 4 | 4704695 | 4705510 |
| MM639 | 4 | 4711416 | 4716693 |
| MM640 | 4 | 4718724 | 4720694 |
| MM641 | 4 | 4730724 | 4732878 |
| MM642 | 4 | 4733238 | 4735513 |
| MM643 | 4 | 4742818 | 4746454 |
| MM644 | 4 | 4782418 | 4788161 |
| MM645 | 4 | 4861117 | 4862429 |
| MM646 | 4 | 4864243 | 4866216 |
| MM647 | 4 | 4951544 | 4954674 |
| MM648 | 4 | 5004468 | 5007767 |
| MM649 | 4 | 5077279 | 5078214 |
| MM650 | 4 | 5124451 | 5125409 |
| MM651 | 4 | 5141956 | 5142391 |
| MM652 | 4 | 5207957 | 5210103 |
| MM653 | 4 | 5303817 | 5308932 |
| MM654 | 4 | 5468765 | 5470776 |

|       |   |          |          |
|-------|---|----------|----------|
| MM655 | 4 | 5479496  | 5480971  |
| MM656 | 4 | 5481345  | 5483015  |
| MM657 | 4 | 5484117  | 5486134  |
| MM658 | 4 | 5494070  | 5494833  |
| MM659 | 4 | 5507085  | 5512217  |
| MM660 | 4 | 5555107  | 5556550  |
| MM661 | 4 | 5588246  | 5589431  |
| MM662 | 4 | 5590701  | 5596682  |
| MM663 | 4 | 5623225  | 5625700  |
| MM664 | 4 | 5627718  | 5630511  |
| MM665 | 4 | 5751470  | 5752399  |
| MM666 | 4 | 5766434  | 5769097  |
| MM667 | 4 | 5862018  | 5864623  |
| MM668 | 4 | 5879330  | 5881930  |
| MM669 | 4 | 5905577  | 5908182  |
| MM670 | 4 | 5913994  | 5916774  |
| MM671 | 4 | 5937095  | 5938217  |
| MM672 | 4 | 5939694  | 5943984  |
| MM673 | 4 | 5965792  | 5971022  |
| MM674 | 4 | 6035420  | 6036060  |
| MM675 | 4 | 6059158  | 6061610  |
| MM676 | 4 | 6112787  | 6114123  |
| MM677 | 4 | 6125997  | 6130122  |
| MM678 | 4 | 6467386  | 6472846  |
| MM679 | 4 | 6723446  | 6729234  |
| MM680 | 4 | 6916150  | 6919455  |
| MM681 | 4 | 6977248  | 6977863  |
| MM682 | 4 | 7358230  | 7358840  |
| MM683 | 4 | 7890527  | 7891464  |
| MM684 | 4 | 8109456  | 8110246  |
| MM685 | 4 | 8148075  | 8150547  |
| MM686 | 4 | 8313708  | 8319324  |
| MM687 | 4 | 8327940  | 8329535  |
| MM688 | 4 | 8620148  | 8623068  |
| MM689 | 4 | 8906581  | 8907231  |
| MM690 | 4 | 9068914  | 9078668  |
| MM691 | 4 | 9483934  | 9485359  |
| MM692 | 4 | 9486574  | 9490039  |
| MM693 | 4 | 9734038  | 9737673  |
| MM694 | 4 | 10527354 | 10529034 |
| MM695 | 4 | 10992797 | 10997912 |
| MM696 | 4 | 11039328 | 11040489 |
| MM697 | 4 | 11045990 | 11046270 |
| MM698 | 4 | 11363449 | 11369169 |
| MM699 | 4 | 11820310 | 11824620 |
| MM700 | 4 | 11825565 | 11826547 |
| MM701 | 4 | 13624419 | 13631859 |

|       |   |          |          |
|-------|---|----------|----------|
| MM702 | 4 | 14531237 | 14532254 |
| MM703 | 4 | 14987455 | 14988333 |
| MM704 | 4 | 17712926 | 17716726 |
| MM705 | 5 | 250204   | 250970   |
| MM706 | 5 | 1686487  | 1686997  |
| MM707 | 5 | 2262159  | 2262544  |
| MM708 | 5 | 2374188  | 2375393  |
| MM709 | 5 | 3005869  | 3007624  |
| MM710 | 5 | 3249529  | 3249844  |
| MM711 | 5 | 3944883  | 3945355  |
| MM712 | 5 | 4320753  | 4323348  |
| MM713 | 5 | 5635294  | 5635620  |
| MM714 | 5 | 6407124  | 6407784  |
| MM715 | 5 | 6433688  | 6438813  |
| MM716 | 5 | 7027577  | 7028347  |
| MM717 | 5 | 7118301  | 7118816  |
| MM718 | 5 | 7823819  | 7824639  |
| MM719 | 5 | 8574747  | 8577717  |
| MM720 | 5 | 8622629  | 8624390  |
| MM721 | 5 | 8666296  | 8667301  |
| MM722 | 5 | 8788121  | 8788791  |
| MM723 | 5 | 9203261  | 9203876  |
| MM724 | 5 | 9206569  | 9207339  |
| MM725 | 5 | 9412161  | 9414631  |
| MM726 | 5 | 9561317  | 9563131  |
| MM727 | 5 | 9707999  | 9708274  |
| MM728 | 5 | 9712277  | 9712777  |
| MM729 | 5 | 9840810  | 9843947  |
| MM730 | 5 | 9925635  | 9926240  |
| MM731 | 5 | 9929045  | 9929765  |
| MM732 | 5 | 9949501  | 9953791  |
| MM733 | 5 | 9980031  | 9982666  |
| MM734 | 5 | 10049721 | 10056270 |
| MM735 | 5 | 10059908 | 10060603 |
| MM736 | 5 | 10061223 | 10063868 |
| MM737 | 5 | 10100538 | 10102484 |
| MM738 | 5 | 10104439 | 10106449 |
| MM739 | 5 | 10116048 | 10116333 |
| MM740 | 5 | 10167992 | 10173112 |
| MM741 | 5 | 10182490 | 10183203 |
| MM742 | 5 | 10216019 | 10219279 |
| MM743 | 5 | 10235840 | 10236459 |
| MM744 | 5 | 10351503 | 10356268 |
| MM745 | 5 | 10359252 | 10361017 |
| MM746 | 5 | 10379549 | 10380204 |
| MM747 | 5 | 10381174 | 10383134 |
| MM748 | 5 | 10398185 | 10400340 |

|       |   |          |          |
|-------|---|----------|----------|
| MM749 | 5 | 10406614 | 10416616 |
| MM750 | 5 | 10446350 | 10448004 |
| MM751 | 5 | 10470245 | 10473768 |
| MM752 | 5 | 10476219 | 10477066 |
| MM753 | 5 | 10497167 | 10504586 |
| MM754 | 5 | 10510858 | 10514670 |
| MM755 | 5 | 10547800 | 10554452 |
| MM756 | 5 | 10574704 | 10578175 |
| MM757 | 5 | 10774381 | 10775334 |
| MM758 | 5 | 10793374 | 10795838 |
| MM759 | 5 | 10802058 | 10802926 |
| MM760 | 5 | 10805387 | 10806029 |
| MM761 | 5 | 10808554 | 10813619 |
| MM762 | 5 | 10838571 | 10839853 |
| MM763 | 5 | 10848777 | 10851102 |
| MM764 | 5 | 10884071 | 10887425 |
| MM765 | 5 | 10888060 | 10888390 |
| MM766 | 5 | 10889685 | 10892155 |
| MM767 | 5 | 10894129 | 10895614 |
| MM768 | 5 | 11038835 | 11040815 |
| MM769 | 5 | 11043845 | 11045147 |
| MM770 | 5 | 11046447 | 11050769 |
| MM771 | 5 | 11055838 | 11056338 |
| MM772 | 5 | 11068088 | 11068878 |
| MM773 | 5 | 11069378 | 11070905 |
| MM774 | 5 | 11198254 | 11202694 |
| MM775 | 5 | 11408293 | 11412746 |
| MM776 | 5 | 11425654 | 11428787 |
| MM777 | 5 | 11452669 | 11453159 |
| MM778 | 5 | 11467885 | 11469206 |
| MM779 | 5 | 11521513 | 11522958 |
| MM780 | 5 | 11523473 | 11525597 |
| MM781 | 5 | 11527937 | 11528397 |
| MM782 | 5 | 11582073 | 11583358 |
| MM783 | 5 | 11592613 | 11593588 |
| MM784 | 5 | 11609462 | 11612587 |
| MM785 | 5 | 11623639 | 11625794 |
| MM786 | 5 | 11647518 | 11652328 |
| MM787 | 5 | 11670167 | 11672138 |
| MM788 | 5 | 11673627 | 11676125 |
| MM789 | 5 | 12114819 | 12115809 |
| MM790 | 5 | 12205600 | 12206406 |
| MM791 | 5 | 12207061 | 12208388 |
| MM792 | 5 | 12209678 | 12211177 |
| MM793 | 5 | 12213679 | 12214479 |
| MM794 | 5 | 12239264 | 12240049 |
| MM795 | 5 | 12267973 | 12268453 |

|       |   |          |          |
|-------|---|----------|----------|
| MM796 | 5 | 12372248 | 12372748 |
| MM797 | 5 | 12374678 | 12378188 |
| MM798 | 5 | 12455244 | 12455524 |
| MM799 | 5 | 12458552 | 12459337 |
| MM800 | 5 | 12527671 | 12529631 |
| MM801 | 5 | 12531155 | 12532310 |
| MM802 | 5 | 12624492 | 12625157 |
| MM803 | 5 | 12672331 | 12675961 |
| MM804 | 5 | 12693478 | 12695123 |
| MM805 | 5 | 12738226 | 12745781 |
| MM806 | 5 | 12747461 | 12749075 |
| MM807 | 5 | 12753573 | 12755493 |
| MM808 | 5 | 12801876 | 12806521 |
| MM809 | 5 | 12983219 | 12984218 |
| MM810 | 5 | 12996743 | 13006353 |
| MM811 | 5 | 13078281 | 13079386 |
| MM812 | 5 | 13082244 | 13082714 |
| MM813 | 5 | 13131903 | 13134333 |
| MM814 | 5 | 13271156 | 13277603 |
| MM815 | 5 | 13354624 | 13354939 |
| MM816 | 5 | 13364736 | 13369487 |
| MM817 | 5 | 13382842 | 13383212 |
| MM818 | 5 | 13510531 | 13511584 |
| MM819 | 5 | 13545206 | 13548491 |
| MM820 | 5 | 13549016 | 13549637 |
| MM821 | 5 | 13592209 | 13593709 |
| MM822 | 5 | 13609582 | 13610201 |
| MM823 | 5 | 13656931 | 13661362 |
| MM824 | 5 | 13666130 | 13666998 |
| MM825 | 5 | 13753476 | 13758196 |
| MM826 | 5 | 13797308 | 13803111 |
| MM827 | 5 | 13805059 | 13806068 |
| MM828 | 5 | 13806603 | 13806933 |
| MM829 | 5 | 13814680 | 13817763 |
| MM830 | 5 | 13838944 | 13840924 |
| MM831 | 5 | 13878051 | 13878481 |
| MM832 | 5 | 13901149 | 13908033 |
| MM833 | 5 | 13929365 | 13930310 |
| MM834 | 5 | 13946515 | 13949105 |
| MM835 | 5 | 13985794 | 13986619 |
| MM836 | 5 | 14100634 | 14107050 |
| MM837 | 5 | 14130621 | 14135451 |
| MM838 | 5 | 14297458 | 14297785 |
| MM839 | 5 | 14564932 | 14566037 |
| MM840 | 5 | 14574666 | 14575466 |
| MM841 | 5 | 14592988 | 14595078 |
| MM842 | 5 | 15092886 | 15099318 |

|       |   |          |          |
|-------|---|----------|----------|
| MM843 | 5 | 15101170 | 15102675 |
| MM844 | 5 | 15376021 | 15377701 |
| MM845 | 5 | 15663492 | 15668447 |
| MM846 | 5 | 15670446 | 15671106 |
| MM847 | 5 | 15687245 | 15693500 |
| MM848 | 5 | 15700805 | 15707179 |
| MM849 | 5 | 15736222 | 15737247 |
| MM850 | 5 | 15739215 | 15739555 |
| MM851 | 5 | 15819093 | 15819918 |
| MM852 | 5 | 15823391 | 15823866 |
| MM853 | 5 | 15937735 | 15939668 |
| MM854 | 5 | 16674280 | 16675285 |
| MM855 | 5 | 16925220 | 16927520 |
| MM856 | 5 | 17105759 | 17113165 |
| MM857 | 5 | 17459022 | 17459667 |
| MM858 | 5 | 17460152 | 17462942 |
| MM859 | 5 | 17613965 | 17620413 |
| MM860 | 5 | 17621236 | 17623160 |
| MM861 | 5 | 18161903 | 18163873 |
| MM862 | 5 | 18488790 | 18489135 |
| MM863 | 5 | 18667661 | 18667936 |
| MM864 | 5 | 19375838 | 19376828 |
| MM865 | 5 | 19378317 | 19379292 |
| MM866 | 5 | 19982222 | 19983047 |
| MM867 | 5 | 21391149 | 21392149 |



**Table S4**

| marker | chr | start_bp | stop_bp  | cM          |
|--------|-----|----------|----------|-------------|
| MM1    | 1   | 4330606  | 4332076  | 0           |
| MM2    | 1   | 6010663  | 6013983  | 1,729195471 |
| MM4    | 1   | 7430002  | 7432267  | 11,73119575 |
| MM5    | 1   | 8490901  | 8491751  | 13,46041678 |
| MM7    | 1   | 8801988  | 8802650  | 16,44647406 |
| MM10   | 1   | 8931514  | 8932319  | 18,17569552 |
| MM11   | 1   | 9574179  | 9575333  | 23,22803886 |
| MM12   | 1   | 9928550  | 9929215  | 23,78509645 |
| MM17   | 1   | 11096911 | 11100708 | 26,13156496 |
| MM20   | 1   | 11322798 | 11324178 | 26,68862279 |
| MM25   | 1   | 12273252 | 12276332 | 29,03509124 |
| MM27   | 1   | 12403422 | 12409842 | 30,16821303 |
| MM33   | 1   | 13003181 | 13008641 | 30,72527098 |
| MM39   | 1   | 13329072 | 13340087 | 33,07173949 |
| MM52   | 1   | 13618483 | 13621742 | 33,62837936 |
| MM58   | 1   | 13833771 | 13837234 | 34,76092688 |
| MM87   | 1   | 15689530 | 15690065 | 36,49000221 |
| MM91   | 1   | 15911298 | 15911993 | 37,04689724 |
| MM101  | 1   | 16372020 | 16377961 | 40,03276696 |
| MM114  | 1   | 16718975 | 16720795 | 40,58982491 |
| MM123  | 1   | 17258838 | 17264340 | 41,14688279 |
| MM126  | 1   | 17363118 | 17368434 | 44,7961642  |
| MM128  | 1   | 17523013 | 17526003 | 45,92928462 |
| MM147  | 1   | 21457161 | 21459296 | 61,19827022 |
| MM150  | 1   | 21750810 | 21758234 | 62,33139088 |
| MM157  | 1   | 22234806 | 22236246 | 63,46451242 |
| MM158  | 1   | 23570478 | 23572928 | 67,8020507  |
| MM159  | 1   | 24432541 | 24433101 | 68,35910841 |
| MM160  | 1   | 24459659 | 24460449 | 70,08832178 |
| MM163  | 1   | 27070457 | 27071391 | 106,3130768 |
| MM166  | 2   | 245700   | 249332   | 0           |
| MM167  | 2   | 373127   | 378679   | 0,557051032 |
| MM168  | 2   | 930664   | 930979   | 4,206332442 |
| MM171  | 2   | 1251574  | 1252848  | 5,339454041 |
| MM240  | 2   | 3730709  | 3734122  | 6,472575946 |
| MM330  | 2   | 5859874  | 5864604  | 7,029634072 |
| MM335  | 2   | 6116421  | 6119529  | 7,586692197 |
| MM357  | 2   | 6961080  | 6965815  | 8,719814102 |
| MM371  | 2   | 7544676  | 7545673  | 9,852936007 |
| MM372  | 2   | 7784246  | 7791011  | 10,40999413 |
| MM373  | 2   | 8278256  | 8281520  | 10,9670522  |
| MM374  | 2   | 8568345  | 8571152  | 12,69627436 |
| MM378  | 2   | 9129123  | 9130835  | 13,25333242 |

|       |   |          |          |             |
|-------|---|----------|----------|-------------|
| MM379 | 2 | 9194501  | 9198421  | 13,81039055 |
| MM380 | 2 | 9659660  | 9659972  | 14,94351194 |
| MM382 | 2 | 10540595 | 10541195 | 21,51183147 |
| MM383 | 2 | 12456566 | 12461464 | 35,62247261 |
| MM385 | 2 | 12743505 | 12743777 | 39,27171782 |
| MM388 | 2 | 15418592 | 15418927 | 61,37189962 |
| MM392 | 3 | 129256   | 129877   | 0           |
| MM396 | 3 | 7061219  | 7061849  | 25,45450367 |
| MM398 | 3 | 7738889  | 7739204  | 26,58762309 |
| MM399 | 3 | 8937125  | 8938547  | 34,7998638  |
| MM400 | 3 | 9228167  | 9232640  | 35,93298506 |
| MM402 | 3 | 9436406  | 9439321  | 36,49004313 |
| MM405 | 3 | 9693424  | 9699210  | 37,62316466 |
| MM414 | 3 | 11117372 | 11121888 | 42,67550807 |
| MM415 | 3 | 11172354 | 11176989 | 43,23256577 |
| MM418 | 3 | 11393148 | 11396743 | 44,36568761 |
| MM427 | 3 | 11797070 | 11799048 | 46,09490971 |
| MM432 | 3 | 12096151 | 12098525 | 46,65196778 |
| MM466 | 3 | 13667971 | 13671251 | 47,20902596 |
| MM495 | 3 | 15186655 | 15188455 | 47,76608414 |
| MM499 | 3 | 15318785 | 15325698 | 48,32314227 |
| MM515 | 3 | 15632482 | 15638053 | 49,45626417 |
| MM527 | 3 | 16184523 | 16191125 | 50,58938608 |
| MM529 | 3 | 16257166 | 16260312 | 51,1464442  |
| MM531 | 3 | 16508925 | 16509440 | 51,70350239 |
| MM537 | 3 | 16821132 | 16825096 | 52,26055959 |
| MM544 | 3 | 18370976 | 18371431 | 64,21989515 |
| MM546 | 3 | 22243503 | 22246468 | 95,64195903 |
| MM547 | 3 | 23215509 | 23218355 | 101,4372846 |
| MM550 | 4 | 788271   | 788751   | 0           |
| MM551 | 4 | 1312610  | 1315610  | 1,729214934 |
| MM552 | 4 | 1447714  | 1448102  | 2,286273001 |
| MM553 | 4 | 1592613  | 1594726  | 2,843331184 |
| MM586 | 4 | 2356046  | 2357721  | 3,40038931  |
| MM587 | 4 | 2596832  | 2603097  | 4,533510704 |
| MM654 | 4 | 5468765  | 5470776  | 11,10178238 |
| MM661 | 4 | 5588246  | 5589431  | 12,23486366 |
| MM665 | 4 | 5751470  | 5752399  | 16,57240194 |
| MM666 | 4 | 5766434  | 5769097  | 17,1294594  |
| MM678 | 4 | 6467386  | 6472846  | 21,46699775 |
| MM679 | 4 | 6723446  | 6729234  | 22,02400587 |
| MM686 | 4 | 8313708  | 8319324  | 32,98211535 |
| MM689 | 4 | 8906581  | 8907231  | 38,77739831 |
| MM691 | 4 | 9483934  | 9485359  | 42,42664598 |
| MM693 | 4 | 9734038  | 9737673  | 42,98370303 |
| MM694 | 4 | 10527354 | 10529034 | 52,98573323 |
| MM695 | 4 | 10992797 | 10997912 | 53,54279052 |

|       |   |          |          |             |
|-------|---|----------|----------|-------------|
| MM698 | 4 | 11363449 | 11369169 | 54,67591218 |
| MM699 | 4 | 11820310 | 11824620 | 58,32518253 |
| MM701 | 4 | 13624419 | 13631859 | 68,32719735 |
| MM703 | 4 | 14987455 | 14988333 | 72,66473374 |
| MM704 | 4 | 17712926 | 17716726 | 82,66675312 |
| MM706 | 5 | 1686487  | 1686997  | 0           |
| MM707 | 5 | 2262159  | 2262544  | 3,649261727 |
| MM712 | 5 | 4320753  | 4323348  | 12,73687297 |
| MM713 | 5 | 5635294  | 5635620  | 22,73888351 |
| MM715 | 5 | 6433688  | 6438813  | 23,29594081 |
| MM716 | 5 | 7027577  | 7028347  | 24,4290622  |
| MM718 | 5 | 7823819  | 7824639  | 30,99738813 |
| MM719 | 5 | 8574747  | 8577717  | 32,7266097  |
| MM721 | 5 | 8666296  | 8667301  | 33,28366771 |
| MM722 | 5 | 8788121  | 8788791  | 34,41678967 |
| MM724 | 5 | 9206569  | 9207339  | 34,97384774 |
| MM725 | 5 | 9412161  | 9414631  | 36,1069697  |
| MM726 | 5 | 9561317  | 9563131  | 36,66402777 |
| MM728 | 5 | 9712277  | 9712777  | 37,79714973 |
| MM731 | 5 | 9929045  | 9929765  | 38,3542078  |
| MM734 | 5 | 10049721 | 10056270 | 39,48732977 |
| MM744 | 5 | 10351503 | 10356268 | 40,04438789 |
| MM823 | 5 | 13656931 | 13661362 | 41,17750986 |
| MM825 | 5 | 13753476 | 13758196 | 41,73456799 |
| MM827 | 5 | 13805059 | 13806068 | 42,29162611 |
| MM832 | 5 | 13901149 | 13908033 | 43,42474808 |
| MM837 | 5 | 14130621 | 14135451 | 43,98180614 |
| MM845 | 5 | 15663492 | 15668447 | 45,11492811 |
| MM849 | 5 | 15736222 | 15737247 | 45,67198623 |
| MM853 | 5 | 15937735 | 15939668 | 46,22904436 |
| MM854 | 5 | 16674280 | 16675285 | 47,36216554 |
| MM859 | 5 | 17613965 | 17620413 | 56,44976439 |
| MM862 | 5 | 18488790 | 18489135 | 57,58285581 |
| MM863 | 5 | 18667661 | 18667936 | 59,92932394 |
| MM865 | 5 | 19378317 | 19379292 | 63,57860502 |
| MM867 | 5 | 21391149 | 21392149 | 65,92506578 |

**Table S5**

| NUMBER | ID |
|--------|----|
| 1      | 8  |
| 2      | 11 |
| 3      | 14 |
| 4      | 18 |
| 5      | 20 |
| 6      | 24 |
| 7      | 36 |
| 8      | 46 |
| 9      | 52 |
| 10     | 53 |
| 11     | 54 |
| 12     | 55 |
| 13     | 60 |
| 14     | 62 |
| 15     | 64 |
| 16     | 69 |
| 17     | 70 |
| 18     | 71 |
| 19     | 73 |
| 20     | 92 |
| 21     | 93 |
| 22     | 94 |
| 23     | 95 |
| 24     | 98 |
| 25     | 99 |

| NUMBER | ID  |
|--------|-----|
| 26     | 101 |
| 27     | 108 |
| 28     | 112 |
| 29     | 114 |
| 30     | 118 |
| 31     | 122 |
| 32     | 137 |
| 33     | 144 |
| 34     | 147 |
| 35     | 148 |
| 36     | 150 |
| 37     | 159 |
| 38     | 164 |
| 39     | 166 |
| 40     | 169 |
| 41     | 170 |
| 42     | 172 |
| 43     | 183 |
| 44     | 193 |
| 45     | 195 |
| 46     | 202 |
| 47     | 208 |
| 48     | 215 |
| 49     | 216 |
| 50     | 218 |

| NUMBER | ID  |
|--------|-----|
| 51     | 222 |
| 52     | 225 |
| 53     | 229 |
| 54     | 232 |
| 55     | 238 |
| 56     | 244 |
| 57     | 252 |
| 58     | 257 |
| 59     | 258 |
| 60     | 260 |
| 61     | 262 |
| 62     | 275 |
| 63     | 276 |
| 64     | 277 |
| 65     | 297 |
| 66     | 305 |
| 67     | 315 |
| 68     | 323 |
| 69     | 326 |
| 70     | 333 |
| 71     | 340 |
| 72     | 344 |
| 73     | 350 |
| 74     | 356 |
| 75     | 361 |

| NUMBER | ID  |
|--------|-----|
| 76     | 362 |
| 77     | 363 |
| 78     | 366 |
| 79     | 368 |
| 80     | 371 |
| 81     | 375 |
| 82     | 391 |
| 83     | 393 |
| 84     | 394 |
| 85     | 400 |
| 86     | 408 |
| 87     | 410 |
| 88     | 425 |
| 89     | 432 |
| 90     | 434 |
| 91     | 437 |
| 92     | 438 |
| 93     | 439 |
| 94     | 454 |
| 95     | 458 |
| 96     | 466 |
| 97     | 467 |
| 98     | 471 |
| 99     | 473 |
| 100    | 477 |

| NUMBER | ID  |
|--------|-----|
| 101    | 480 |
| 102    | 488 |
| 103    | 492 |
| 104    | 493 |
| 105    | 494 |
| 106    | 495 |
| 107    | 497 |
| 108    | 500 |
| 109    | 503 |
| 110    | 506 |
| 111    | 508 |
| 112    | 523 |
| 113    | 538 |
| 114    | 539 |
| 115    | 556 |
| 116    | 558 |
| 117    | 559 |
| 118    | 561 |
| 119    | 567 |
| 120    | 570 |
| 121    | 572 |
| 122    | 573 |
| 123    | 579 |

**Table S6**

| marker_id | TE_id      | TE_family  | TE_clade    | TE_order  | TE_class | autonomy | mobilization       | mobilization_comment             | evidence sequencing |
|-----------|------------|------------|-------------|-----------|----------|----------|--------------------|----------------------------------|---------------------|
| MM1       | AT1TE14085 | ATMU4      | undefined   | MuDr      | DNA      | auto     | defective          | TIR, no continuous ORF           |                     |
| MM2       | AT1TE19430 | ATCOPIA64  | undefined   | copla     | LTR      | auto     | defective          | no RT                            |                     |
| MM5       | AT1TE27405 | ATLINEIII  | L1          | LINE      | Non-LTR  | auto     | defective          | short                            |                     |
| MM11      | AT1TE30845 | HELITRON1  | undefined   | undefined | Helitron | auto     | defective          | short, no ORFs                   |                     |
| MM12      | AT1TE32015 | ATCOPIA64  | undefined   | copla     | LTR      | auto     | defective          | no RT                            |                     |
| MM17      | AT1TE35855 | ATLINE2    | L1          | LINE      | Non-LTR  | auto     | defective          | short                            |                     |
| MM17      | AT1TE35860 | ATLINEIII  | L1          | LINE      | Non-LTR  | auto     | defective          | short                            |                     |
| MM25      | AT1TE39880 | ATCOPIA35  | undefined   | copla     | LTR      | auto     | defective          | short, defective LTRs, no RT     |                     |
| MM27      | AT1TE40340 | ATLANTYS1  | Tat-like    | gypsy     | LTR      | auto     | defective          | short                            |                     |
| MM27      | AT1TE40345 | TAT1_ATH   | Tat-like    | gypsy     | LTR      | auto     | defective          | short                            |                     |
| MM27      | AT1TE40355 | ATCOPIA60  | undefined   | copla     | LTR      | auto     | defective          | no RT                            |                     |
| MM33      | AT1TE42395 | ATGP3      | Chromovirus | gypsy     | LTR      | auto     | potentially mobile | LTRs, pol protein seems complete | NO                  |
| MM33      | AT1TE42400 | ATGP3      | Chromovirus | gypsy     | LTR      | auto     | defective          | short                            |                     |
| MM39      | AT1TE43585 | ATCOPIA84  | undefined   | copla     | LTR      | auto     | defective          | no RT                            |                     |
| MM39      | AT1TE43605 | ATGP3      | Chromovirus | gypsy     | LTR      | auto     | defective          | defective LTRs                   |                     |
| MM52      | AT1TE44600 | TA11       | L1          | LINE      | Non-LTR  | auto     | defective          | short                            |                     |
| MM52      | AT1TE44605 | TA11       | L1          | LINE      | Non-LTR  | auto     | defective          | no RT                            |                     |
| MM58      | AT1TE45360 | ATCOPIA94  | undefined   | copla     | LTR      | auto     | defective          | short                            |                     |
| MM58      | AT1TE45365 | ATCOPIA75  | undefined   | copla     | LTR      | auto     | defective          | short                            |                     |
| MM87      | AT1TE51665 | ATENSPM3   | undefined   | En-Spm    | DNA      | auto     | defective          | short, no TIR                    |                     |
| MM87      | AT1TE51670 | ATENSPM7   | undefined   | En-Spm    | DNA      | auto     | defective          | short, TIR                       |                     |
| MM91      | AT1TE52380 | VANDAL12   | undefined   | MuDr      | DNA      | auto     | defective          | short, no TIR                    |                     |
| MM91      | AT1TE52385 | VANDAL9    | undefined   | MuDr      | DNA      | auto     | defective          | no TIR                           |                     |
| MM101     | AT1TE53960 | ATLANTYS2  | Tat-like    | gypsy     | LTR      | auto     | defective          | short                            |                     |
| MM101     | AT1TE53970 | ATCOPIA69  | undefined   | copla     | LTR      | auto     | defective          | no RT                            |                     |
| MM101     | AT1TE53975 | ATLANTYS2  | Tat-like    | gypsy     | LTR      | auto     | defective          | defective LTRs                   |                     |
| MM123     | AT1TE57215 | ATLANTYS1  | Tat-like    | gypsy     | LTR      | auto     | defective          | short                            |                     |
| MM123     | AT1TE57220 | ATLANTYS1  | Tat-like    | gypsy     | LTR      | auto     | defective          | defective LTRs                   |                     |
| MM123     | AT1TE57225 | ATLANTYS1  | Tat-like    | gypsy     | LTR      | auto     | defective          | short                            |                     |
| MM126     | AT1TE57530 | ATCOPIA49  | undefined   | copla     | LTR      | auto     | defective          | no RT                            |                     |
| MM128     | AT1TE58075 | ATCOPIA38A | undefined   | copla     | LTR      | auto     | potentially mobile | RT, LTRs, ORF>340aa              | NO                  |

|       |            |             |              |        |         |          |                    |                                          |    |
|-------|------------|-------------|--------------|--------|---------|----------|--------------------|------------------------------------------|----|
| MM147 | AT1TE70805 | ATLINE1_1   | L1           | LINE   | Non-LTR | auto     | defective          | RT, TSD, frameshifts                     |    |
| MM150 | AT1TE71770 | ATHATN3     | undefined    | HAT    | DNA     | auto     | defective          | short, TIR                               |    |
| MM150 | AT1TE71775 | ATCOPIA8B   | undefined    | copla  | LTR     | auto     | defective          | no RT                                    |    |
| MM150 | AT1TE71780 | ATCOPIA67   | undefined    | copla  | LTR     | auto     | defective          | short                                    |    |
| MM150 | AT1TE71790 | VANDAL1N1   | undefined    | MuDr   | DNA     | non-auto | defective          | no TIR                                   |    |
| MM157 | AT1TE73425 | ATLINEIII   | L1           | LINE   | Non-LTR | auto     | defective          | short                                    |    |
| MM159 | AT1TE80250 | ATCOPIA49   | undefined    | copla  | LTR     | auto     | defective          | short                                    |    |
| MM166 | AT2TE01000 | ATLINEIII   | L1           | LINE   | Non-LTR | auto     | defective          | no RT                                    |    |
| MM167 | AT2TE01550 | ATLINE1_5   | L1           | LINE   | Non-LTR | auto     | defective          | short                                    |    |
| MM167 | AT2TE01555 | ATLINE1_4   | L1           | LINE   | Non-LTR | auto     | defective          | short                                    |    |
| MM167 | AT2TE01560 | TA11        | L1           | LINE   | Non-LTR | auto     | defective          | short                                    |    |
| MM240 | AT2TE16160 | ATLINE2     | L1           | LINE   | Non-LTR | auto     | defective          | no RT                                    |    |
| MM240 | AT2TE16165 | ATENSPM10   | undefined    | En-Spm | DNA     | auto     | defective          | short, no TIR                            |    |
| MM330 | AT2TE23855 | ATCOPIA13   | undefined    | copla  | LTR     | auto     | defective          | RT, defective LTRs, but intact ORF       |    |
| MM335 | AT2TE24860 | ATHILA8A    | Errantivirus | gypsy  | LTR     | auto     | defective          | defective LTRs                           |    |
| MM357 | AT2TE28325 | ATCOPIA38B  | undefined    | copla  | LTR     | auto     | potentially mobile | RT, LTRs, ORF>340aa                      | NO |
| MM371 | AT2TE30990 | RathE3_cons | undefined    | SINE   | Non-LTR | non-auto | not defined        |                                          |    |
| MM372 | AT2TE32120 | TA11        | L1           | LINE   | Non-LTR | auto     | defective          | RT, ORF1 too short or fragmented, no TSD |    |
| MM373 | AT2TE34410 | ATLINEIII   | L1           | LINE   | Non-LTR | auto     | defective          | no RT                                    |    |
| MM374 | AT2TE35840 | ATCOPIA69   | undefined    | copla  | LTR     | auto     | potentially mobile | RT, LTRs, ORF>340aa                      | NO |
| MM378 | AT2TE38575 | ATCOPIA74   | undefined    | copla  | LTR     | auto     | defective          | no RT                                    |    |
| MM379 | AT2TE38900 | ATCOPIA76   | undefined    | copla  | LTR     | auto     | defective          | RT, defective LTRs                       |    |
| MM382 | AT2TE45205 | BRODYAGA1   | undefined    | MuDr   | DNA     | non-auto | not defined        | TIR                                      |    |
| MM383 | AT2TE54360 | ATLINEIII   | L1           | LINE   | Non-LTR | auto     | potentially mobile | RT, 2 ORFs, no frameshifts, no TSD       | NO |
| MM383 | AT2TE54365 | ATLINE2     | L1           | LINE   | Non-LTR | auto     | defective          | short                                    |    |
| MM400 | AT3TE38565 | ATCOPIA65   | undefined    | copla  | LTR     | auto     | potentially mobile | RT, LTRs, ORF>340aa                      | NO |
| MM400 | AT3TE38575 | ATCOPIA45   | undefined    | copla  | LTR     | auto     | defective          | short                                    |    |
| MM402 | AT3TE39395 | ATLINE2     | L1           | LINE   | Non-LTR | auto     | defective          | no RT                                    |    |
| MM405 | AT3TE40420 | ATCOPIA82   | undefined    | copla  | LTR     | auto     | potentially mobile | RT, LTRs, ORF>340aa                      | NO |
| MM405 | AT3TE40425 | ATLINE1_3A  | L1           | LINE   | Non-LTR | auto     | defective          | short                                    |    |
| MM414 | AT3TE46245 | ATCOPIA19   | undefined    | copla  | LTR     | auto     | potentially mobile | RT, LTRs, ORF>340aa                      | NO |
| MM415 | AT3TE46480 | TA11        | L1           | LINE   | Non-LTR | auto     | defective          | short                                    |    |
| MM415 | AT3TE46490 | ATLINE1_5   | L1           | LINE   | Non-LTR | auto     | defective          | short                                    |    |
| MM415 | AT3TE46495 | ATLINE1_5   | L1           | LINE   | Non-LTR | auto     | defective          | short                                    |    |
| MM418 | AT3TE47500 | ATGP3       | Chromovirus  | gypsy  | LTR     | auto     | defective          | defective LTRs                           |    |
| MM418 | AT3TE47505 | ATCOPIA37   | undefined    | copla  | LTR     | auto     | defective          | short                                    |    |

|       |            |            |              |       |         |          |                    |                                          |    |
|-------|------------|------------|--------------|-------|---------|----------|--------------------|------------------------------------------|----|
| MM418 | AT3TE47515 | ATCOPIA37  | undefined    | copia | LTR     | auto     | defective          | short                                    |    |
| MM427 | AT3TE49090 | ATMU5      | undefined    | MuDr  | DNA     | auto     | defective          | TIR, no continuous ORF                   |    |
| MM432 | AT3TE50320 | ATHATN3    | undefined    | HAT   | DNA     | auto     | defective          | short, no TIR                            |    |
| MM466 | AT3TE55430 | ATCOPIA65  | undefined    | copia | LTR     | auto     | defective          | no RT                                    |    |
| MM495 | AT3TE61685 | ATLINE1_2  | L1           | LINE  | Non-LTR | auto     | defective          | RT, no ORF1                              |    |
| MM499 | AT3TE62220 | ATLINEIII  | L1           | LINE  | Non-LTR | auto     | defective          | no RT                                    |    |
| MM499 | AT3TE62225 | ATHILA5    | Errantivirus | gypsy | LTR     | auto     | defective          | short                                    |    |
| MM499 | AT3TE62230 | ATCOPIA95  | undefined    | copia | LTR     | auto     | defective          | short                                    |    |
| MM515 | AT3TE63165 | ATCOPIA16  | undefined    | copia | LTR     | auto     | defective          | no RT                                    |    |
| MM527 | AT3TE65525 | ATLINEIII  | L1           | LINE  | Non-LTR | auto     | defective          | no RT                                    |    |
| MM529 | AT3TE65835 | TA11       | L1           | LINE  | Non-LTR | auto     | defective          | RT, ORF1 too short or fragmented, no TSD |    |
| MM529 | AT3TE65840 | ATLINE1_4  | L1           | LINE  | Non-LTR | auto     | defective          | short                                    |    |
| MM537 | AT3TE68090 | ATCOPIA81  | undefined    | copia | LTR     | auto     | potentially mobile | RT, LTRs, ORF>340aa                      | NO |
| MM546 | AT3TE90530 | ATCOPIA23  | undefined    | copia | LTR     | auto     | potentially mobile | RT, LTRs, ORF>340aa                      | NO |
| MM547 | AT3TE94580 | ATLINEIII  | L1           | LINE  | Non-LTR | auto     | potentially mobile | RT, 2 ORFs, no frameshifts, no TSD       | NO |
| MM551 | AT4TE06710 | ATCOPIA2   | undefined    | copia | LTR     | auto     | potentially mobile | RT, LTRs, ORF>340aa                      | NO |
| MM553 | AT4TE08110 | AT9TSD1    | undefined    | MuDr  | DNA     | non-auto | not defined        | TIR                                      |    |
| MM586 | AT4TE10975 | TA11       | L1           | LINE  | Non-LTR | auto     | defective          | short                                    |    |
| MM586 | AT4TE10980 | TA11       | L1           | LINE  | Non-LTR | auto     | defective          | no RT                                    |    |
| MM587 | AT4TE12170 | ATLINE1_3A | L1           | LINE  | Non-LTR | auto     | defective          | short                                    |    |
| MM587 | AT4TE12175 | ATCOPIA69  | undefined    | copia | LTR     | auto     | defective          | no RT                                    |    |
| MM678 | AT4TE27640 | ATCOPIA50  | undefined    | copia | LTR     | auto     | defective          | no RT                                    |    |
| MM679 | AT4TE28870 | ATCOPIA17  | undefined    | copia | LTR     | auto     | potentially mobile | RT, LTRs, ORF>340aa                      | NO |
| MM686 | AT4TE36845 | ATCOPIA17  | undefined    | copia | LTR     | auto     | defective          | no RT                                    |    |
| MM686 | AT4TE36850 | ATCOPIA17  | undefined    | copia | LTR     | auto     | defective          | short                                    |    |
| MM689 | AT4TE39815 | ATLINE1_2  | L1           | LINE  | Non-LTR | auto     | potentially mobile | RT, 2 ORFs, no frameshifts, no TSD       | NO |
| MM691 | AT4TE42860 | ATCOPIA4   | undefined    | copia | LTR     | auto     | potentially mobile | RT, LTRs, ORF>340aa                      | NO |
| MM693 | AT4TE44080 | ATCOPIA1   | undefined    | copia | LTR     | auto     | potentially mobile | RT, LTRs, ORF>340aa                      | NO |
| MM695 | AT4TE50435 | ATCOPIA47  | undefined    | copia | LTR     | auto     | potentially mobile | RT, LTRs, ORF>340aa                      | NO |
| MM698 | AT4TE52315 | ATCOPIA10  | undefined    | copia | LTR     | auto     | potentially mobile | RT, LTRs, ORF>340aa                      | NO |
| MM698 | AT4TE52320 | ATLINE2    | L1           | LINE  | Non-LTR | auto     | defective          | short                                    |    |
| MM699 | AT4TE54700 | ATGP3      | Chromovirus  | gypsy | LTR     | auto     | defective          | LTRs, pol protein incomplete             |    |
| MM701 | AT4TE64170 | ATCOPIA8A  | undefined    | copia | LTR     | auto     | defective          | short                                    |    |
| MM701 | AT4TE64175 | ATCOPIA8A  | undefined    | copia | LTR     | auto     | defective          | short                                    |    |
| MM701 | AT4TE64180 | ATCOPIA8B  | undefined    | copia | LTR     | auto     | potentially mobile | RT, LTRs, ORF>340aa                      | NO |
| MM703 | AT4TE71195 | VANDAL6    | undefined    | MuDr  | DNA     | auto     | defective          | TIR, ORF too short                       |    |

|       |            |           |              |           |          |          |                    |                                          |    |
|-------|------------|-----------|--------------|-----------|----------|----------|--------------------|------------------------------------------|----|
| MM704 | AT4TE85580 | ATCOPIA45 | undefined    | copia     | LTR      | auto     | potentially mobile | RT, LTRs, ORF>340aa                      | NO |
| MM706 | AT5TE06100 | ATREP4    | undefined    | undefined | Helitron | non-auto | not defined        | short, no ORFs                           |    |
| MM715 | AT5TE23285 | ATCOPIA90 | undefined    | copia     | LTR      | auto     | defective          | no RT                                    |    |
| MM716 | AT5TE25460 | VANDAL20  | undefined    | MuDr      | DNA      | auto     | defective          | TIR, no continuous ORF                   |    |
| MM719 | AT5TE31020 | ATLINE1_6 | L1           | LINE      | Non-LTR  | auto     | potentially mobile | RT, 2 ORFs, no frameshifts, no TSD       | NO |
| MM725 | AT5TE34170 | ATLINE1_6 | L1           | LINE      | Non-LTR  | auto     | defective          | short                                    |    |
| MM725 | AT5TE34175 | ATLINE1_6 | L1           | LINE      | Non-LTR  | auto     | defective          | short                                    |    |
| MM726 | AT5TE34730 | VANDAL8   | undefined    | MuDr      | DNA      | auto     | defective          | TIR, no continuous ORF                   |    |
| MM728 | AT5TE35265 | ATMU5     | undefined    | MuDr      | DNA      | auto     | defective          | no TIR, no continuous ORF                |    |
| MM731 | AT5TE36160 | ATLINE2   | L1           | LINE      | Non-LTR  | auto     | defective          | short                                    |    |
| MM734 | AT5TE36610 | ATREP3    | undefined    | undefined | Helitron | non-auto | not defined        | short, no ORFs                           |    |
| MM734 | AT5TE36615 | ATLINE1_6 | L1           | LINE      | Non-LTR  | auto     | defective          | short                                    |    |
| MM734 | AT5TE36620 | ATLINE1_6 | L1           | LINE      | Non-LTR  | auto     | defective          | no RT                                    |    |
| MM744 | AT5TE37800 | TA11      | L1           | LINE      | Non-LTR  | auto     | defective          | RT, TSD, frameshifts                     |    |
| MM823 | AT5TE48535 | TA11      | L1           | LINE      | Non-LTR  | auto     | defective          | short                                    |    |
| MM823 | AT5TE48540 | ATLINE1_5 | L1           | LINE      | Non-LTR  | auto     | defective          | short                                    |    |
| MM825 | AT5TE48930 | ATCOPIA24 | undefined    | copia     | LTR      | auto     | potentially mobile | RT, LTRs, ORF>340aa                      | NO |
| MM832 | AT5TE49480 | ATLINEIII | L1           | LINE      | Non-LTR  | auto     | defective          | short                                    |    |
| MM832 | AT5TE49485 | ATLINEIII | L1           | LINE      | Non-LTR  | auto     | defective          | short                                    |    |
| MM832 | AT5TE49490 | ATLINEIII | L1           | LINE      | Non-LTR  | auto     | defective          | short                                    |    |
| MM832 | AT5TE49495 | ATLINEIII | L1           | LINE      | Non-LTR  | auto     | defective          | RT, ORF1 too short or fragmented, no TSD |    |
| MM837 | AT5TE50380 | ATCOPIA91 | undefined    | copia     | LTR      | auto     | potentially mobile | RT, LTRs, ORF>340aa                      | NO |
| MM845 | AT5TE56585 | ATCOPIA25 | undefined    | copia     | LTR      | auto     | potentially mobile | RT, LTRs, ORF>340aa                      | NO |
| MM849 | AT5TE56780 | ATLINEIII | L1           | LINE      | Non-LTR  | auto     | defective          | RT, ORF1 too short or fragmented, no TSD |    |
| MM859 | AT5TE63610 | ENDOVIR1  | Errantivirus | gypsy     | LTR      | auto     | potentially mobile | LTRs, pol protein seems complete         | NO |
| MM865 | AT5TE69650 | ATLINE2   | L1           | LINE      | Non-LTR  | auto     | defective          | short                                    |    |

#### Abbreviations:

|     |                          |
|-----|--------------------------|
| TIR | Terminal Inverted Repeat |
| ORF | Open Reading Frame       |
| RT  | Reverse Transcriptase    |
| LTR | Long Terminal Repeats    |
| TSD | Target Site Duplications |



**Table S7**

| Marker_id_epiRIL | chromosome | epiRIL_start_bp | epiRIL_stop_bp | Marker_id_P2 | Marker_id_P3 |
|------------------|------------|-----------------|----------------|--------------|--------------|
| MM1              | 1          | 4330606         | 4332076        | 1-4359800    | 1-4359800    |
| MM2              | 1          | 6010663         | 6013983        | 1-6149751    | 1-6001538    |
| MM4              | 1          | 7430002         | 7432267        | 1-7644962    | 1-7047756    |
| MM5              | 1          | 8490901         | 8491751        | 1-8439006    | 1-8439006    |
| MM7              | 1          | 8801988         | 8802650        | 1-8993233    | 1-8993233    |
| MM17             | 1          | 11096911        | 11100708       | 1-11139723   | 1-11139723   |
| MM25             | 1          | 12273252        | 12276332       | 1-12179065   | 1-12179065   |
| MM33             | 1          | 13003181        | 13008641       | 1-13038240   | 1-13005911   |
| MM39             | 1          | 13329072        | 13340087       | 1-13334580   | 1-13207971   |
| MM52             | 1          | 13618483        | 13621742       | 1-13859051   | 1-13859051   |
| MM87             | 1          | 15689530        | 15690065       | 1-15630635   | 1-15630635   |
| MM101            | 1          | 16372020        | 16377961       | 1-16279095   | 1-16279095   |
| MM114            | 1          | 16718975        | 16720795       | 1-16645134   | 1-16645134   |
| MM123            | 1          | 17258838        | 17264340       | 1-17102334   | 1-17102334   |
| MM147            | 1          | 21457161        | 21459296       | 1-21559246   | 1-21167712   |
| MM157            | 1          | 22234806        | 22236246       | 1-22743028   | 1-22200580   |
| MM158            | 1          | 23570478        | 23572928       | 1-23381914   | 1-23906908   |
| MM159            | 1          | 24432541        | 24433101       | 1-24114746   | 1-24810967   |
| MM163            | 1          | 27070457        | 27071391       | 1-27230162   | 1-27230162   |
| MM166            | 2          | 245700          | 249332         | 2-498807     | 2-498807     |
| MM171            | 2          | 1251574         | 1252848        | 2-1447413    | 2-1172482    |
| MM240            | 2          | 3730709         | 3734122        | 2-3520754    | 2-4344527    |
| MM330            | 2          | 5859874         | 5864604        | 2-5682223    | 2-5682223    |
| MM335            | 2          | 6116421         | 6119529        | 2-6117975    | 2-6044749    |
| MM357            | 2          | 6961080         | 6965815        | 2-6970449    | 2-6970449    |
| MM371            | 2          | 7544676         | 7545673        | 2-7400522    | 2-7633698    |
| MM373            | 2          | 8278256         | 8281520        | 2-8225326    | 2-8279888    |
| MM374            | 2          | 8568345         | 8571152        | 2-8796903    | 2-8561080    |
| MM378            | 2          | 9129123         | 9130835        | 2-9057864    | 2-9461465    |
| MM380            | 2          | 9659660         | 9659972        | 2-9461465    | 2-9792570    |
| MM382            | 2          | 10540595        | 10541195       | 2-10556376   | 2-10556376   |
| MM383            | 2          | 12456566        | 12461464       | 2-12520610   | 2-12520610   |
| MM385            | 2          | 12743505        | 12743777       | 2-12717797   | 2-12717797   |
| MM388            | 2          | 15418592        | 15418927       | 2-15445245   | 2-15445245   |
| MM392            | 3          | 129256          | 129877         | 3-290174     | 3-290174     |
| MM396            | 3          | 7061219         | 7061849        | 3-7123630    | 3-7359421    |
| MM398            | 3          | 7738889         | 7739204        | 3-7359421    | 3-7702216    |
| MM399            | 3          | 8937125         | 8938547        | 3-8633204    | 3-8633204    |
| MM400            | 3          | 9228167         | 9232640        | 3-9136628    | 3-9230404    |
| MM405            | 3          | 9693424         | 9699210        | 3-9924267    | 3-9924267    |
| MM414            | 3          | 11117372        | 11121888       | 3-10847881   | 3-10847881   |
| MM427            | 3          | 11797070        | 11799048       | 3-11748521   | 3-11748521   |
| MM432            | 3          | 12096151        | 12098525       | 3-12276692   | 3-12276692   |

|       |   |          |                     |            |
|-------|---|----------|---------------------|------------|
| MM466 | 3 | 13667971 | 13671251 3-13495418 | 3-13495379 |
| MM515 | 3 | 15632482 | 15638053 3-15712057 | 3-15712057 |
| MM527 | 3 | 16184523 | 16191125 3-15913994 | 3-15913994 |
| MM531 | 3 | 16508925 | 16509440 3-16509183 | 3-16629399 |
| MM537 | 3 | 16821132 | 16825096 3-16848354 | 3-16848354 |
| MM544 | 3 | 18370976 | 18371431 3-18258898 | 3-18258898 |
| MM546 | 3 | 22243503 | 22246468 3-22221736 | 3-22221736 |
| MM547 | 3 | 23215509 | 23218355 3-23088778 | 3-23211977 |
| MM550 | 4 | 788271   | 788751 4-945976     | 4-945976   |
| MM551 | 4 | 1312610  | 1315610 4-1512987   | 4-1512987  |
| MM586 | 4 | 2356046  | 2357721 4-2103325   | 4-2383725  |
| MM654 | 4 | 5468765  | 5470776 4-5643991   | 4-5643991  |
| MM678 | 4 | 6467386  | 6472846 4-6293204   | 4-5931550  |
| MM686 | 4 | 8313708  | 8319324 4-8034821   | 4-8034821  |
| MM689 | 4 | 8906581  | 8907231 4-9167906   | 4-9167906  |
| MM691 | 4 | 9483934  | 9485359 4-9575956   | 4-9575956  |
| MM693 | 4 | 9734038  | 9737673 4-10089916  | 4-10346818 |
| MM694 | 4 | 10527354 | 10529034 4-10346818 | 4-10607774 |
| MM695 | 4 | 10992797 | 10997912 4-11017270 | 4-10995355 |
| MM698 | 4 | 11363449 | 11369169 4-11366309 | 4-11320394 |
| MM701 | 4 | 13624419 | 13631859 4-13788227 | 4-13788227 |
| MM703 | 4 | 14987455 | 14988333 4-14957828 | 4-14957828 |
| MM704 | 4 | 17712926 | 17716726 4-17538469 | 4-17538469 |
| MM706 | 5 | 1686487  | 1686997 5-1603469   | 5-1603469  |
| MM707 | 5 | 2262159  | 2262544 5-2229415   | 5-2287470  |
| MM712 | 5 | 4320753  | 4323348 5-4233682   | 5-4233682  |
| MM713 | 5 | 5635294  | 5635620 5-5535964   | 5-5535964  |
| MM715 | 5 | 6433688  | 6438813 5-6519202   | 5-6519202  |
| MM716 | 5 | 7027577  | 7028347 5-7047330   | 5-7047330  |
| MM718 | 5 | 7823819  | 7824639 5-7813295   | 5-7824229  |
| MM719 | 5 | 8574747  | 8577717 5-8427379   | 5-8427379  |
| MM724 | 5 | 9206569  | 9207339 5-9358168   | 5-9358168  |
| MM744 | 5 | 10351503 | 10356268 5-10782718 | 5-10488859 |
| MM823 | 5 | 13656931 | 13661362 5-13784419 | 5-13784419 |
| MM845 | 5 | 15663492 | 15668447 5-15466566 | 5-15466566 |
| MM854 | 5 | 16674280 | 16675285 5-16583743 | 5-16816665 |
| MM859 | 5 | 17613965 | 17620413 5-17591339 | 5-17591339 |
| MM862 | 5 | 18488790 | 18489135 5-18638175 | 5-18707445 |
| MM865 | 5 | 19378317 | 19379292 5-19320777 | 5-19697188 |
| MM867 | 5 | 21391149 | 21392149 5-21294493 | 5-21294493 |

| Marker_id_P6 | Marker_id_P7 | Marker_id_P8 | Marker_id_P9 | Marker_id_P10 | Marker_id_P12 |
|--------------|--------------|--------------|--------------|---------------|---------------|
| 1-4200550    | 1-4359800    | 1-4359800    | 1-4359800    | 1-4200550     | 1-4359800     |
| 1-6001538    | 1-6001538    | 1-6001538    | 1-6001538    | 1-6001538     | 1-6001538     |
| 1-7047756    | 1-7644962    | 1-7644962    | 1-7644962    | 1-7644962     | 1-7644962     |
| 1-8439006    | 1-8439006    | 1-8439006    | 1-8350582    | 1-8439006     | 1-8439006     |
| 1-9205325    | 1-8993233    | 1-9001217    | 1-8993233    | 1-8993233     | 1-8802319     |
| 1-10653718   | 1-10903254   | 1-10903254   | 1-10653718   | 1-11026901    | 1-10903254    |
| 1-12179065   | 1-12179065   | 1-12179065   | 1-12179065   | 1-12179065    | 1-12686038    |
| 1-12686038   | 1-13038240   | 1-12686038   | 1-13005911   | 1-13038240    | 1-13005911    |
| 1-13207971   | 1-13334580   | 1-13207971   | 1-13207971   | 1-13207971    | 1-13207971    |
| 1-14158183   | 1-13859051   | 1-13859051   | 1-14001934   | 1-14158183    | 1-13859051    |
| 1-15630635   | 1-15897174   | 1-15630635   | 1-15630635   | 1-15630635    | 1-15630635    |
| 1-16374991   | 1-15985718   | 1-16279095   | 1-16279095   | 1-16279095    | 1-16279095    |
| 1-16913975   | 1-16645134   | 1-17102334   | 1-16645134   | 1-16645134    | 1-16913975    |
| 1-17102334   | 1-17102334   | 1-17605952   | 1-17605952   | 1-17102334    | 1-17102334    |
| 1-21559246   | 1-21559246   | 1-21559246   | 1-21167712   | 1-21559246    | 1-21559246    |
| 1-22743028   | 1-22200580   | 1-22200580   | 1-22200580   | 1-22743028    | 1-22200580    |
| 1-23906908   | 1-23381914   | 1-23381914   | 1-23381914   | 1-23381914    | 1-23381914    |
| 1-24114746   | 1-24114746   | 1-24810967   | 1-24114746   | 1-24114746    | 1-24114746    |
| 1-27230162   | 1-27634939   | 1-27230162   | 1-27230162   | 1-27634939    | 1-27230162    |
| 2-498807     | 2-176156     | 2-498807     | 2-176156     | 2-247516      | 2-498807      |
| 2-1986922    | 2-1172482    | 2-1986922    | 2-1172482    | 2-1788467     | 2-1172482     |
| 2-3520754    | 2-3520754    | 2-3520754    | 2-3520754    | 2-3520754     | 2-3042043     |
| 2-5682223    | 2-5469974    | 2-5682223    | 2-5627965    | 2-5682223     | 2-5682223     |
| 2-6044749    | 2-6809099    | 2-6117975    | 2-6044749    | 2-6044749     | 2-6809099     |
| 2-6970449    | 2-6970449    | 2-6970449    | 2-6970449    | 2-6970449     | 2-6970449     |
| 2-7633698    | 2-7400522    | 2-7633698    | 2-7633698    | 2-7633698     | 2-7633698     |
| 2-8279888    | 2-8225326    | 2-8225326    | 2-8225326    | 2-8279888     | 2-8225326     |
| 2-8561080    | 2-8561080    | 2-8561080    | 2-8561080    | 2-8561080     | 2-8561080     |
| 2-9057864    | 2-9461465    | 2-9129979    | 2-9057864    | 2-8796903     | 2-9057864     |
| 2-9461465    | 2-9792570    | 2-9792570    | 2-9461465    | 2-9792570     | 2-9659816     |
| 2-10365194   | 2-10556376   | 2-10556376   | 2-10556376   | 2-10365194    | 2-10556376    |
| 2-12520610   | 2-12520610   | 2-12520610   | 2-12520610   | 2-12520610    | 2-12520610    |
| 2-13007536   | 2-12717797   | 2-13007536   | 2-13007536   | 2-12717797    | 2-12717797    |
| 2-15445245   | 2-15445245   | 2-15445245   | 2-15445245   | 2-15445245    | 2-15782230    |
| 3-400931     | 3-400931     | 3-290174     | 3-290174     | 3-290174      | 3-290174      |
| 3-6528008    | 3-7123630    | 3-7359421    | 3-7123630    | 3-7123630     | 3-7359421     |
| 3-7359421    | 3-7359421    | 3-7702216    | 3-7702216    | 3-7702216     | 3-7702216     |
| 3-8633204    | 3-8456601    | 3-8633204    | 3-8633204    | 3-8633204     | 3-8633204     |
| 3-9136628    | 3-9136628    | 3-9136628    | 3-9230404    | 3-9136628     | 3-9136628     |
| 3-9924267    | 3-10070201   | 3-9924267    | 3-9924267    | 3-9924267     | 3-10070201    |
| 3-11107344   | 3-10847881   | 3-11107344   | 3-10358588   | 3-11107344    | 3-10358588    |
| 3-11798059   | 3-11748521   | 3-11798059   | 3-11798059   | 3-11748521    | 3-11748521    |
| 3-13495379   | 3-12276692   | 3-12276692   | 3-13495418   | 3-12276692    | 3-12785230    |

|            |            |            |            |            |            |
|------------|------------|------------|------------|------------|------------|
| 3-13495418 | 3-13669611 | 3-13495418 | 3-14104253 | 3-13495418 | 3-13495418 |
| 3-15522173 | 3-15712057 | 3-15712057 | 3-15712057 | 3-15522173 | 3-15712057 |
| 3-15913994 | 3-15913994 | 3-15913994 | 3-16187824 | 3-15913994 | 3-16187824 |
| 3-16629399 | 3-16509183 | 3-16629399 | 3-16509183 | 3-16629399 | 3-16509183 |
| 3-16848354 | 3-16848354 | 3-16848354 | 3-16848354 | 3-17878794 | 3-16848354 |
| 3-18258898 | 3-18258898 | 3-18258898 | 3-18258898 | 3-18258898 | 3-18258898 |
| 3-22446488 | 3-22221736 | 3-22221736 | 3-22221736 | 3-22446488 | 3-22221736 |
| 3-23088778 | 3-23211977 | 3-23211977 | 3-23088778 | 3-23088778 | 3-23211977 |
| 4-945976   | 4-434712   | 4-945976   | 4-434712   | 4-945976   | 4-945976   |
| 4-1512987  | 4-945976   | 4-1512987  | 4-1512987  | 4-1512987  | 4-1512987  |
| 4-2775749  | 4-2383725  | 4-2383725  | 4-2383725  | 4-2103325  | 4-2383725  |
| 4-5931550  | 4-5196578  | 4-5643991  | 4-5643991  | 4-5196578  | 4-5386239  |
| 4-6293204  | 4-6470116  | 4-6293204  | 4-6293204  | 4-6470116  | 4-6293204  |
| 4-8034821  | 4-8034821  | 4-8585617  | 4-7934924  | 4-8585617  | 4-8034821  |
| 4-9167906  | 4-8906906  | 4-8906906  | 4-8585617  | 4-9167906  | 4-8906906  |
| 4-9575956  | 4-9167906  | 4-9167906  | 4-9575956  | 4-9575956  | 4-9167906  |
| 4-10089916 | 4-10089916 | 4-10346818 | 4-10089916 | 4-10089916 | 4-10346818 |
| 4-10607774 | 4-10346818 | 4-10607774 | 4-10607774 | 4-10607774 | 4-10607774 |
| 4-10995355 | 4-11017270 | 4-10995355 | 4-11017270 | 4-10995355 | 4-11017270 |
| 4-11320394 | 4-11559979 | 4-11320394 | 4-11559979 | 4-11320394 | 4-11320394 |
| 4-13467985 | 4-13788227 | 4-13788227 | 4-13788227 | 4-13788227 | 4-13467985 |
| 4-14957828 | 4-15325586 | 4-14957828 | 4-14957828 | 4-15863233 | 4-14736664 |
| 4-18060948 | 4-17538469 | 4-18060948 | 4-18060948 | 4-17538469 | 4-17538469 |
| 5-1603469  | 5-1384732  | 5-1917139  | 5-1603469  | 5-1166716  | 5-1603469  |
| 5-2287470  | 5-2229415  | 5-2229415  | 5-2287470  | 5-2287470  | 5-2287470  |
| 5-4233682  | 5-4448082  | 5-4233682  | 5-4448082  | 5-4233682  | 5-4233682  |
| 5-5535964  | 5-5799941  | 5-5535964  | 5-5535964  | 5-5535964  | 5-5535964  |
| 5-6519202  | 5-6436251  | 5-6519202  | 5-6519202  | 5-5799941  | 5-6055546  |
| 5-7340989  | 5-6801277  | 5-7047330  | 5-7047330  | 5-6801277  | 5-7047330  |
| 5-7813295  | 5-7813295  | 5-7813295  | 5-7340989  | 5-7813295  | 5-7813295  |
| 5-8024482  | 5-8427379  | 5-8427379  | 5-8576232  | 5-8427379  | 5-8427379  |
| 5-9206954  | 5-9358168  | 5-9547224  | 5-9358168  | 5-9881268  | 5-9881268  |
| 5-10488859 | 5-10782718 | 5-10488859 | 5-10488859 | 5-10488859 | 5-10488859 |
| 5-13784419 | 5-13445912 | 5-13784419 | 5-13784419 | 5-13784419 | 5-13784419 |
| 5-15466566 | 5-15878281 | 5-15466566 | 5-15466566 | 5-15466566 | 5-15466566 |
| 5-16583743 | 5-16816665 | 5-16583743 | 5-16583743 | 5-17115580 | 5-16583743 |
| 5-17591339 | 5-17959456 | 5-17115580 | 5-17591339 | 5-17591339 | 5-17591339 |
| 5-18638175 | 5-18707445 | 5-18638175 | 5-18638175 | 5-18638175 | 5-18638175 |
| 5-19697188 | 5-19320777 | 5-19320777 | 5-19320777 | 5-19320777 | 5-19697188 |
| 5-21757545 | 5-21294493 | 5-21294493 | 5-21757545 | 5-21294493 | 5-21757545 |

| Marker_id_P15 | Marker_id_P17 | Marker_id_P19 | Marker_id_P20 | Marker_id_P35 | Marker_id_P66 |
|---------------|---------------|---------------|---------------|---------------|---------------|
| 1-4359800     | 1-4359800     | 1-4359800     | 1-4359800     | 1-4359800     | 1-4200550     |
| 1-6001538     | 1-6001538     | 1-6149751     | 1-6149751     | 1-6001538     | 1-6149751     |
| 1-7644962     | 1-7644962     | 1-7047756     | 1-7644962     | 1-7644962     | 1-7047756     |
| 1-8350582     | 1-8439006     | 1-8439006     | 1-8350582     | 1-8439006     | 1-8439006     |
| 1-8993233     | 1-8993233     | 1-8993233     | 1-8993233     | 1-8802319     | 1-8993233     |
| 1-10903254    | 1-11026901    | 1-11139723    | 1-10903254    | 1-11026901    | 1-10903254    |
| 1-12686038    | 1-12686038    | 1-12179065    | 1-12686038    | 1-12686038    | 1-12179065    |
| 1-13005911    | 1-13038240    | 1-13038240    | 1-13038240    | 1-13038240    | 1-13038240    |
| 1-13207971    | 1-13207971    | 1-13334580    | 1-13207971    | 1-13207971    | 1-13334580    |
| 1-13859051    | 1-14001934    | 1-13859051    | 1-13859051    | 1-14001934    | 1-13859051    |
| 1-15605577    | 1-15897174    | 1-15897174    | 1-15630635    | 1-15630635    | 1-15630635    |
| 1-16279095    | 1-16279095    | 1-15985718    | 1-15985718    | 1-16279095    | 1-15985718    |
| 1-16645134    | 1-16645134    | 1-16913975    | 1-16645134    | 1-16913975    | 1-16913975    |
| 1-17102334    | 1-17102334    | 1-17102334    | 1-17605952    | 1-17102334    | 1-17605952    |
| 1-21559246    | 1-21559246    | 1-21559246    | 1-21167712    | 1-21167712    | 1-21559246    |
| 1-22200580    | 1-22200580    | 1-22200580    | 1-22743028    | 1-22975205    | 1-23381914    |
| 1-23130317    | 1-23381914    | 1-23381914    | 1-23381914    | 1-23906908    | 1-23906908    |
| 1-24114746    | 1-24114746    | 1-24810967    | 1-24810967    | 1-24810967    | 1-24114746    |
| 1-27230162    | 1-27230162    | 1-26404106    | 1-27230162    | 1-27230162    | 1-27230162    |
| 2-176156      | 2-757335      | 2-176156      | 2-247516      | 2-176156      | 2-247516      |
| 2-1172482     | 2-1172482     | 2-1172482     | 2-1172482     | 2-1788467     | 2-1172482     |
| 2-4344527     | 2-3520754     | 2-3520754     | 2-4344527     | 2-4344527     | 2-4778556     |
| 2-5682223     | 2-5627965     | 2-5682223     | 2-5682223     | 2-5682223     | 2-5469974     |
| 2-6044749     | 2-6044749     | 2-6044749     | 2-6044749     | 2-6044749     | 2-6044749     |
| 2-6970449     | 2-7048904     | 2-7048904     | 2-6809112     | 2-6970449     | 2-6809112     |
| 2-7633698     | 2-7633698     | 2-7633698     | 2-7633698     | 2-7400522     | 2-7400522     |
| 2-8225326     | 2-8225326     | 2-8225326     | 2-8225326     | 2-8225326     | 2-8225326     |
| 2-8561080     | 2-8561080     | 2-8561080     | 2-8796903     | 2-8796903     | 2-8561080     |
| 2-9129979     | 2-9057864     | 2-9461465     | 2-9057864     | 2-9057864     | 2-9057864     |
| 2-9792570     | 2-9461465     | 2-9792570     | 2-9792570     | 2-9792570     | 2-9792570     |
| 2-10811132    | 2-10556376    | 2-10556376    | 2-10365194    | 2-10365194    | 2-10365194    |
| 2-12335750    | 2-12520610    | 2-12019213    | 2-12459015    | 2-12019213    | 2-12019213    |
| 2-13007536    | 2-12717797    | 2-12717797    | 2-12717797    | 2-12717797    | 2-12717797    |
| 2-15445245    | 2-15445245    | 2-15097876    | 2-15782230    | 2-15445245    | 2-15445245    |
| 3-290174      | 3-400931      | 3-400931      | 3-290174      | 3-290174      | 3-290174      |
| 3-7123630     | 3-7123630     | 3-7359421     | 3-7123630     | 3-7123630     | 3-7123630     |
| 3-7359421     | 3-7702216     | 3-7702216     | 3-7702216     | 3-7359421     | 3-7359421     |
| 3-8633204     | 3-8633204     | 3-8633204     | 3-8633204     | 3-8633204     | 3-8633204     |
| 3-9136628     | 3-9136628     | 3-9136628     | 3-9230404     | 3-9136628     | 3-9136628     |
| 3-10358588    | 3-9924267     | 3-9924267     | 3-9924267     | 3-9924267     | 3-10358588    |
| 3-10847881    | 3-10847881    | 3-10847881    | 3-11107344    | 3-11107344    | 3-11107344    |
| 3-11748521    | 3-11748521    | 3-11748521    | 3-11748521    | 3-11798059    | 3-11748521    |
| 3-12276692    | 3-12276692    | 3-12785230    | 3-12276692    | 3-12276692    | 3-12276692    |

|            |            |            |            |            |            |
|------------|------------|------------|------------|------------|------------|
| 3-13107123 | 3-13495418 | 3-13495418 | 3-13495418 | 3-13495379 | 3-13495418 |
| 3-15712057 | 3-15712057 | 3-15712057 | 3-15712057 | 3-15522173 | 3-15712057 |
| 3-16187824 | 3-15913994 | 3-16187824 | 3-16187824 | 3-16187824 | 3-15913994 |
| 3-16509183 | 3-16629399 | 3-16629399 | 3-16629399 | 3-16629399 | 3-16629399 |
| 3-16848354 | 3-16848354 | 3-16848354 | 3-17878794 | 3-16848354 | 3-17211862 |
| 3-18258898 | 3-18532958 | 3-18258898 | 3-18532958 | 3-18532958 | 3-18258898 |
| 3-22221736 | 3-22221736 | 3-22446488 | 3-22221736 | 3-22221736 | 3-22221736 |
| 3-23216932 | 3-23088778 | 3-23211977 | 3-23211977 | 3-23211977 | 3-23211977 |
| 4-945976   | 4-434712   | 4-945976   | 4-208650   | 4-434712   | 4-434712   |
| 4-1512987  | 4-1782389  | 4-1314110  | 4-1512987  | 4-945976   | 4-2103325  |
| 4-2383725  | 4-2383725  | 4-1512987  | 4-2383725  | 4-2383725  | 4-3002169  |
| 4-5196578  | 4-5643991  | 4-5196578  | 4-5196578  | 4-5643991  | 4-5643991  |
| 4-6293204  | 4-6293204  | 4-6293204  | 4-6293204  | 4-6293204  | 4-6293204  |
| 4-8585617  | 4-7934924  | 4-8034821  | 4-7934924  | 4-7724867  | 4-8034821  |
| 4-8906906  | 4-8585617  | 4-8585617  | 4-8906906  | 4-8585617  | 4-8585617  |
| 4-9167906  | 4-9575956  | 4-9575956  | 4-9575956  | 4-9575956  | 4-9484647  |
| 4-10089916 | 4-10346818 | 4-9735856  | 4-10346818 | 4-9735856  | 4-9735856  |
| 4-10607774 | 4-10607774 | 4-10528194 | 4-10607774 | 4-10346818 | 4-10346818 |
| 4-11017270 | 4-11017270 | 4-11017270 | 4-11017270 | 4-11017270 | 4-11017270 |
| 4-11320394 | 4-11320394 | 4-11320394 | 4-11320394 | 4-11559979 | 4-11559979 |
| 4-13788227 | 4-13960078 | 4-13788227 | 4-13788227 | 4-13788227 | 4-13788227 |
| 4-14957828 | 4-14736664 | 4-14736664 | 4-14957828 | 4-14957828 | 4-14736664 |
| 4-18060948 | 4-17538469 | 4-17538469 | 4-17538469 | 4-18262372 | 4-17538469 |
| 5-1603469  | 5-1384732  | 5-1603469  | 5-1603469  | 5-1603469  | 5-1917139  |
| 5-2229415  | 5-2287470  | 5-2287470  | 5-2287470  | 5-1917139  | 5-2287470  |
| 5-4448082  | 5-4233682  | 5-4233682  | 5-4233682  | 5-4233682  | 5-4233682  |
| 5-5799941  | 5-5535964  | 5-5799941  | 5-5535964  | 5-5535964  | 5-5799941  |
| 5-6519202  | 5-6519202  | 5-6519202  | 5-6519202  | 5-6519202  | 5-6519202  |
| 5-6801277  | 5-7047330  | 5-6801277  | 5-6801277  | 5-7047330  | 5-7047330  |
| 5-7813295  | 5-7340989  | 5-7813295  | 5-7340989  | 5-7813295  | 5-7340989  |
| 5-8427379  | 5-8427379  | 5-8576232  | 5-8427379  | 5-8427379  | 5-8427379  |
| 5-9358168  | 5-9358168  | 5-9358168  | 5-9358168  | 5-9358168  | 5-9358168  |
| 5-10488859 | 5-10782718 | 5-10782718 | 5-10488859 | 5-10488859 | 5-10782718 |
| 5-13848611 | 5-13784419 | 5-13784419 | 5-13784419 | 5-13784419 | 5-13848611 |
| 5-15466566 | 5-15466566 | 5-15878281 | 5-15466566 | 5-15466566 | 5-15878281 |
| 5-16583743 | 5-17115580 | 5-16816665 | 5-16583743 | 5-16583743 | 5-16583743 |
| 5-17591339 | 5-17591339 | 5-17591339 | 5-17591339 | 5-17591339 | 5-17591339 |
| 5-18638175 | 5-18638175 | 5-18638175 | 5-18638175 | 5-18638175 | 5-18638175 |
| 5-19320777 | 5-19320777 | 5-19697188 | 5-19320777 | 5-19320777 | 5-19320777 |
| 5-21294493 | 5-21294493 | 5-21294493 | 5-21294493 | 5-21294493 | 5-21294493 |

| Marker_id_P129 | Marker_id_P145 | Marker_id_P169 |
|----------------|----------------|----------------|
| 1-4200550      | 1-4359800      | 1-4359800      |
| 1-6001538      | 1-6001538      | 1-6001538      |
| 1-7644962      | 1-7644962      | 1-7644962      |
| 1-8439006      | 1-8350582      | 1-8439006      |
| 1-8993233      | 1-8993233      | 1-8802319      |
| 1-11026901     | 1-10903254     | 1-10653718     |
| 1-12179065     | 1-12179065     | 1-12179065     |
| 1-13038240     | 1-13038240     | 1-13038240     |
| 1-13207971     | 1-13334580     | 1-13334580     |
| 1-14001934     | 1-13859051     | 1-13859051     |
| 1-15630635     | 1-15630635     | 1-15897174     |
| 1-16279095     | 1-16374991     | 1-16279095     |
| 1-16645134     | 1-16645134     | 1-16913975     |
| 1-17605952     | 1-17102334     | 1-17102334     |
| 1-21559246     | 1-21559246     | 1-21167712     |
| 1-22200580     | 1-22200580     | 1-22200580     |
| 1-23381914     | 1-23632223     | 1-23632223     |
| 1-24114746     | 1-24114746     | 1-24114746     |
| 1-27230162     | 1-27230162     | 1-27634939     |
| 2-176156       | 2-498807       | 2-176156       |
| 2-1447413      | 2-1172482      | 2-1172482      |
| 2-4344527      | 2-4344527      | 2-3520754      |
| 2-5682223      | 2-5682223      | 2-5682223      |
| 2-6044749      | 2-6044749      | 2-6809099      |
| 2-7048904      | 2-6970449      | 2-7048904      |
| 2-7633698      | 2-7400522      | 2-7400522      |
| 2-8225326      | 2-8279888      | 2-8279888      |
| 2-8561080      | 2-8561080      | 2-8796903      |
| 2-9057864      | 2-8796903      | 2-9057864      |
| 2-9461465      | 2-9461465      | 2-9792570      |
| 2-10365194     | 2-10556376     | 2-10556376     |
| 2-12520610     | 2-12520610     | 2-12520610     |
| 2-12717797     | 2-12717797     | 2-12717797     |
| 2-15445245     | 2-15445245     | 2-15097876     |
| 3-290174       | 3-290174       | 3-290174       |
| 3-7123630      | 3-7123630      | 3-7123630      |
| 3-7702216      | 3-7359421      | 3-7359421      |
| 3-8633204      | 3-8633204      | 3-8633204      |
| 3-9136628      | 3-9136628      | 3-9136628      |
| 3-9924267      | 3-9924267      | 3-9924267      |
| 3-10847881     | 3-11107344     | 3-10358588     |
| 3-11798059     | 3-11798059     | 3-11748521     |
| 3-12785230     | 3-12276692     | 3-12276692     |

|            |            |            |
|------------|------------|------------|
| 3-13495379 | 3-13495418 | 3-13495418 |
| 3-15712057 | 3-15522173 | 3-15712057 |
| 3-16187824 | 3-15913994 | 3-15913994 |
| 3-16629399 | 3-16509183 | 3-16629399 |
| 3-16848354 | 3-16848354 | 3-17878794 |
| 3-18532958 | 3-18258898 | 3-18258898 |
| 3-22221736 | 3-22221736 | 3-22221736 |
| 3-23211977 | 3-23211977 | 3-23211977 |
| 4-208650   | 4-208650   | 4-434712   |
| 4-945976   | 4-945976   | 4-1512987  |
| 4-2383725  | 4-2383725  | 4-2775749  |
| 4-5643991  | 4-5386239  | 4-5386239  |
| 4-6293204  | 4-6293204  | 4-5931550  |
| 4-8585617  | 4-8034821  | 4-8034821  |
| 4-8906906  | 4-8906906  | 4-9167906  |
| 4-9167906  | 4-9167906  | 4-9575956  |
| 4-10346818 | 4-10346818 | 4-9735856  |
| 4-10607774 | 4-10607774 | 4-10089916 |
| 4-11017270 | 4-11017270 | 4-10995355 |
| 4-11366309 | 4-11320394 | 4-11559979 |
| 4-13788227 | 4-13788227 | 4-13788227 |
| 4-14957828 | 4-14957828 | 4-14957828 |
| 4-17538469 | 4-18060948 | 4-18060948 |
| 5-1603469  | 5-1603469  | 5-1603469  |
| 5-2229415  | 5-2287470  | 5-2287470  |
| 5-4233682  | 5-4233682  | 5-4233682  |
| 5-5535964  | 5-5535964  | 5-5535964  |
| 5-5799941  | 5-6801277  | 5-6519202  |
| 5-6801277  | 5-7047330  | 5-7047330  |
| 5-7813295  | 5-7340989  | 5-7813295  |
| 5-8427379  | 5-8576232  | 5-8427379  |
| 5-9206954  | 5-9358168  | 5-9358168  |
| 5-9881268  | 5-9881268  | 5-10488859 |
| 5-13848611 | 5-13784419 | 5-13784419 |
| 5-15466566 | 5-15878281 | 5-15466566 |
| 5-16583743 | 5-16583743 | 5-16583743 |
| 5-17959456 | 5-17959456 | 5-17959456 |
| 5-18707445 | 5-18707445 | 5-18707445 |
| 5-19320777 | 5-19320777 | 5-19320777 |
| 5-21294493 | 5-21757545 | 5-21757545 |



**Table S8****A- Fold-increase relative to chromosome average**

|         | 1                          | 2                          | 3                          | 4                          | 5                          |                             |
|---------|----------------------------|----------------------------|----------------------------|----------------------------|----------------------------|-----------------------------|
| Peri    | 0.40<br>0.79 (0.46 - 1.03) | 0.15<br>0.66 (0.27 - 1.06) | 0.40<br>0.66 (0.40 - 1.11) | 1.03<br>0.72 (0.07 - 1.07) | 0.50<br>0.83 (0.50 - 1.15) | epiRILs<br>F <sub>2</sub> s |
| AT zone | 0.55<br>1.27 (0.89 - 1.55) | 0.76<br>1.67 (0.84 - 1.92) | 1.04<br>1.37 (0.93 - 1.85) | 1.19<br>1.60 (1.23 - 2.01) | 0.87<br>1.54 (1.22 - 1.73) | epiRILs<br>F <sub>2</sub> s |
| Arms    | 1.23<br>1.04 (0.94 - 1.16) | 1.60<br>1.08 (0.85 - 1.54) | 1.18<br>1.04 (0.78 - 1.21) | 1.05<br>1.11 (1.02 - 1.28) | 1.30<br>1.01 (0.76 - 1.12) | epiRILs<br>F <sub>2</sub> s |

**B- Fold-decrease relative to chromosome average**

|         | 1                          | 2                          | 3                          | 4                           | 5                          |                             |
|---------|----------------------------|----------------------------|----------------------------|-----------------------------|----------------------------|-----------------------------|
| Peri    | 2.50<br>1.27 (0.97 - 2.15) | 6.88<br>1.51 (0.95 - 3.68) | 2.53<br>1.52 (0.90 - 2.48) | 0.97<br>1.39 (0.93 - 14.01) | 2.01<br>1.20 (0.87 - 1.98) | epiRILs<br>F <sub>2</sub> s |
| AT zone | 1.80<br>0.79 (0.64 - 1.13) | 1.31<br>0.60 (0.52 - 1.19) | 0.96<br>0.73 (0.54 - 1.08) | 0.84<br>0.62 (0.50 - 0.81)  | 1.15<br>0.65 (0.58 - 0.82) | epiRILs<br>F <sub>2</sub> s |
| Arms    | 0.81<br>0.96 (0.86 - 1.06) | 0.62<br>0.93 (0.65 - 1.18) | 0.85<br>0.96 (0.83 - 1.28) | 0.95<br>0.90 (0.78 - 0.98)  | 0.77<br>0.99 (0.89 - 1.32) | epiRILs<br>F <sub>2</sub> s |

**Table S9**

| Interval Name | Chromosome | Start    | Stop     | Length | #Recombina<br>nt epiRILs | Breakpoints<br>Proportions |
|---------------|------------|----------|----------|--------|--------------------------|----------------------------|
| MM24          | Chr1       | 11519877 | 11754109 | 234232 | 3                        | 0,09375                    |
| MM26          | Chr1       | 12315004 | 12403422 | 88419  | 2                        | 0,0625                     |
| MM29          | Chr1       | 12741147 | 12856990 | 115844 | 1                        | 0,03125                    |
| MM36          | Chr1       | 13098250 | 13239811 | 141562 | 1                        | 0,03125                    |
| MM38          | Chr1       | 13264736 | 13329072 | 64337  | 3                        | 0,09375                    |
| MM45          | Chr1       | 13433353 | 13491291 | 57939  | 1                        | 0,03125                    |
| MM53          | Chr1       | 13680349 | 13690605 | 10257  | 2                        | 0,0625                     |
| MM62          | Chr1       | 13969593 | 14052579 | 82987  | 3                        | 0,09375                    |
| MM90          | Chr1       | 15881127 | 15911298 | 30172  | 1                        | 0,03125                    |
| MM95          | Chr1       | 16077497 | 16109836 | 32340  | 5                        | 0,15625                    |
| MM107         | Chr1       | 16554298 | 16567689 | 13392  | 1                        | 0,03125                    |
| MM119         | Chr1       | 16858275 | 17025691 | 167417 | 1                        | 0,03125                    |
| MM125         | Chr1       | 17284412 | 17363118 | 78707  | 6                        | 0,1875                     |
| MM126         | Chr1       | 17363118 | 17491702 | 128585 | 2                        | 0,0625                     |
| MM168         | Chr2       | 930664   | 1198126  | 267463 | 3                        | 0,2                        |
| MM176         | Chr2       | 1490016  | 1665553  | 175538 | 2                        | 0,13333333                 |
| MM198         | Chr2       | 2293691  | 2365305  | 71615  | 1                        | 0,06666667                 |
| MM230         | Chr2       | 3171525  | 3175617  | 4093   | 1                        | 0,06666667                 |
| MM326         | Chr2       | 5725548  | 5737238  | 11691  | 2                        | 0,13333333                 |
| MM333         | Chr2       | 6016231  | 6112653  | 96423  | 1                        | 0,06666667                 |
| MM353         | Chr2       | 6790136  | 6849039  | 58904  | 2                        | 0,13333333                 |
| MM365         | Chr2       | 7231001  | 7544676  | 313676 | 3                        | 0,2                        |
| MM414         | Chr3       | 11117372 | 11172354 | 54983  | 1                        | 0,05882353                 |
| MM415         | Chr3       | 11172354 | 11366256 | 193903 | 2                        | 0,11764706                 |
| MM426         | Chr3       | 11745751 | 11797070 | 51320  | 3                        | 0,17647059                 |
| MM428         | Chr3       | 11880839 | 11935156 | 54318  | 1                        | 0,05882353                 |
| MM464         | Chr3       | 13475436 | 13506800 | 31365  | 1                        | 0,05882353                 |
| MM490         | Chr3       | 14942954 | 15004668 | 61715  | 1                        | 0,05882353                 |
| MM495         | Chr3       | 15186655 | 15240769 | 54115  | 1                        | 0,05882353                 |
| MM509         | Chr3       | 15581951 | 15586908 | 4958   | 2                        | 0,11764706                 |
| MM524         | Chr3       | 15973325 | 16008020 | 34696  | 2                        | 0,11764706                 |
| MM527         | Chr3       | 16184523 | 16256031 | 71509  | 1                        | 0,05882353                 |
| MM529         | Chr3       | 16257166 | 16304478 | 47313  | 1                        | 0,05882353                 |
| MM536         | Chr3       | 16702155 | 16821132 | 118978 | 1                        | 0,05882353                 |
| MM552         | Chr4       | 1447714  | 1592613  | 144900 | 1                        | 0,05263158                 |
| MM557         | Chr4       | 1820123  | 1996722  | 176600 | 1                        | 0,05263158                 |
| MM586         | Chr4       | 2356046  | 2596832  | 240787 | 2                        | 0,10526316                 |
| MM615         | Chr4       | 3707081  | 3719963  | 12883  | 1                        | 0,05263158                 |
| MM629         | Chr4       | 4358332  | 4539542  | 181211 | 1                        | 0,05263158                 |
| MM644         | Chr4       | 4782418  | 4861117  | 78700  | 1                        | 0,05263158                 |
| MM651         | Chr4       | 5141956  | 5468765  | 326810 | 2                        | 0,10526316                 |
| MM660         | Chr4       | 5555107  | 5588246  | 33140  | 2                        | 0,10526316                 |

|       |      |          |          |        |   |            |
|-------|------|----------|----------|--------|---|------------|
| MM664 | Chr4 | 5627718  | 5751470  | 123753 | 7 | 0,36842105 |
| MM665 | Chr4 | 5751470  | 5766434  | 14965  | 1 | 0,05263158 |
| MM722 | Chr5 | 8788121  | 9203261  | 415141 | 1 | 0,02857143 |
| MM724 | Chr5 | 9206569  | 9412161  | 205593 | 2 | 0,05714286 |
| MM725 | Chr5 | 9412161  | 9561317  | 149157 | 1 | 0,02857143 |
| MM726 | Chr5 | 9561317  | 9707999  | 146683 | 2 | 0,05714286 |
| MM728 | Chr5 | 9712277  | 9840810  | 128534 | 1 | 0,02857143 |
| MM733 | Chr5 | 9980031  | 10049721 | 69691  | 2 | 0,05714286 |
| MM739 | Chr5 | 10116048 | 10351503 | 235456 | 2 | 0,05714286 |
| MM748 | Chr5 | 10398185 | 10497167 | 98983  | 1 | 0,02857143 |
| MM771 | Chr5 | 11055838 | 11068088 | 12251  | 1 | 0,02857143 |
| MM774 | Chr5 | 11198254 | 11408293 | 210040 | 1 | 0,02857143 |
| MM804 | Chr5 | 12693478 | 12738226 | 44749  | 1 | 0,02857143 |
| MM810 | Chr5 | 12996743 | 13078281 | 81539  | 1 | 0,02857143 |
| MM820 | Chr5 | 13549016 | 13592209 | 43194  | 5 | 0,14285714 |
| MM822 | Chr5 | 13609582 | 13656931 | 47350  | 3 | 0,08571429 |
| MM824 | Chr5 | 13666130 | 13753476 | 87347  | 1 | 0,02857143 |
| MM826 | Chr5 | 13797308 | 13805059 | 7752   | 1 | 0,02857143 |
| MM831 | Chr5 | 13878051 | 13901149 | 23099  | 4 | 0,11428571 |
| MM834 | Chr5 | 13946515 | 13985794 | 39280  | 1 | 0,02857143 |
| MM843 | Chr5 | 15101170 | 15376021 | 274852 | 2 | 0,05714286 |
| MM848 | Chr5 | 15700805 | 15736222 | 35418  | 1 | 0,02857143 |
| MM852 | Chr5 | 15823391 | 15937735 | 114345 | 1 | 0,02857143 |

**Table S10**

| Window* | Start marker interval | Stop marker interval | # Recombinations | # Recombinant epiRILs | # epiRILs with shared breakpoint | % epiRILs with shared breakpoint | Start shared Breakpoint interval | Stop shared Breakpoint interval | Length shared Breakpoint interval |
|---------|-----------------------|----------------------|------------------|-----------------------|----------------------------------|----------------------------------|----------------------------------|---------------------------------|-----------------------------------|
| Chr 1 B | 11,100,758            | 13,618,482           | 13               | 12                    | 3                                | 25.0                             | 11,518,537                       | 12,273,391                      | 754,855                           |
|         |                       |                      |                  |                       | 3                                | 25.0                             | 13,101,452                       | 13,241,436                      | 139,985                           |
| Chr 1 A | 15,690,116            | 17,258,837           | 6                | 6                     | 0                                | 0.0                              | -                                | -                               | -                                 |
| Chr 2 B | 249,383               | 1,251,573            | 9                | 9                     | 4                                | 44.4                             | 378,733                          | 536,423                         | 157,691                           |
| Chr 2 A | 5,864,654             | 8,568,344            | 10               | 10                    | 3                                | 33.3                             | 8,281,415                        | 8,568,344                       | 286,930                           |
| Chr 3 B | 8,938,604             | 12,096,150           | 20               | 19                    | 5                                | 26.3                             | 9,710,200                        | 10,112,728                      | 402,529                           |
|         |                       |                      |                  |                       | 3                                | 15.8                             | 11,704,365                       | 11,797,504                      | 93,140                            |
| Chr 3 A | 15,638,113            | 18,370,975           | 21               | 21                    | 3                                | 14.3                             | 16,973,828                       | 17,989,636                      | 1,015,809                         |
|         |                       |                      |                  |                       | 4                                | 19.0                             | 17,995,327                       | 18,370,975                      | 375,649                           |
| Chr 4 B | 788,808               | 2,356,045            | 6                | 6                     | 0                                | 0.0                              | -                                | -                               | -                                 |
| Chr 4 A | 5,470,842             | 8,313,707            | 31               | 26                    | 3                                | 11.5                             | 5,683,645                        | 5,751,920                       | 68,276                            |
|         |                       |                      |                  |                       | 3                                | 11.5                             | 6,919,334                        | 6,977,247                       | 57,914                            |
|         |                       |                      |                  |                       | 4                                | 15.4                             | 6,977,575                        | 8,313,907                       | 1,336,333                         |
| Chr 5 B | 7,824,697             | 10,351,502           | 16               | 16                    | 3                                | 18.8                             | 8,667,186                        | 9,206,733                       | 539,548                           |
| Chr 5 A | 13,661,415            | 16,674,279           | 11               | 11                    | 0                                | 0.0                              | -                                | -                               | -                                 |

\* B = window **B**efore centromere  
A = window **A**fter centromere

**Table S11-A**

| chr 1 |       |      |       | chr 2 |      |      |      | chr 3 |       |      |       | chr 4 |      |      |       | chr 5 |      |      |      |
|-------|-------|------|-------|-------|------|------|------|-------|-------|------|-------|-------|------|------|-------|-------|------|------|------|
| cross | cM    | low  | up    | cross | cM   | low  | up   | cross | cM    | low  | up    | cross | cM   | low  | up    | cross | cM   | low  | up   |
| P129  | 67.5  | 57.9 | 79.1  | P3    | 42.2 | 34.5 | 51.4 | P35   | 68.9  | 57.8 | 80.3  | P35   | 57.1 | 47.5 | 67.0  | P8    | 46.7 | 37.8 | 56.2 |
| P9    | 70.2  | 59.1 | 81.9  | P66   | 44.3 | 35.8 | 53.3 | P9    | 71.0  | 59.9 | 83.3  | P12   | 58.8 | 49.6 | 69.8  | P129  | 57.3 | 47.6 | 67.1 |
| P35   | 73.5  | 63.3 | 85.8  | P10   | 47.8 | 39.8 | 57.9 | P129  | 73.6  | 63.1 | 85.7  | P9    | 60.3 | 50.7 | 71.0  | P169  | 58.9 | 49.1 | 68.8 |
| P12   | 73.8  | 63.8 | 85.5  | P169  | 48.8 | 40.7 | 58.8 | P169  | 73.8  | 62.4 | 85.5  | P19   | 61.0 | 51.6 | 73.1  | P9    | 60.7 | 51.5 | 71.7 |
| P169  | 76.7  | 64.7 | 89.0  | P129  | 49.5 | 40.6 | 59.0 | P10   | 75.6  | 64.5 | 87.8  | P10   | 61.5 | 51.5 | 75.2  | P35   | 62.3 | 52.8 | 71.7 |
| P3    | 77.8  | 65.8 | 89.8  | P9    | 50.4 | 41.7 | 60.7 | P15   | 75.9  | 64.3 | 88.0  | P3    | 62.9 | 52.9 | 74.9  | P7    | 63.2 | 53.6 | 74.0 |
| P8    | 78.0  | 66.5 | 90.3  | P8    | 50.4 | 42.1 | 60.7 | P2    | 77.9  | 67.3 | 90.8  | P8    | 63.1 | 52.9 | 73.5  | P145  | 63.8 | 54.6 | 75.5 |
| P15   | 81.8  | 69.6 | 95.1  | P15   | 51.6 | 42.9 | 60.9 | P66   | 78.2  | 66.3 | 91.9  | P129  | 63.4 | 53.8 | 75.2  | P12   | 64.5 | 54.7 | 75.8 |
| P145  | 84.4  | 72.4 | 97.2  | P35   | 52.0 | 43.3 | 62.5 | P8    | 82.0  | 69.7 | 95.9  | P7    | 64.0 | 54.0 | 76.2  | P19   | 64.9 | 55.4 | 76.5 |
| P66   | 86.4  | 74.9 | 100.5 | P20   | 52.5 | 43.0 | 62.4 | P145  | 84.1  | 72.9 | 97.0  | P66   | 64.8 | 54.1 | 75.6  | P2    | 66.7 | 56.7 | 77.3 |
| P6    | 86.7  | 74.7 | 99.8  | P6    | 53.5 | 44.4 | 64.7 | P12   | 84.3  | 71.8 | 98.7  | P15   | 65.0 | 54.5 | 77.9  | EPI   | 67.3 | 52.7 | 83.6 |
| P19   | 86.9  | 74.9 | 100.9 | P145  | 54.8 | 45.0 | 65.4 | P3    | 84.7  | 73.3 | 98.4  | P2    | 67.4 | 57.5 | 80.3  | P17   | 67.5 | 57.5 | 79.6 |
| P10   | 87.1  | 75.1 | 100.2 | P7    | 55.6 | 46.4 | 66.3 | P7    | 85.4  | 72.5 | 100.1 | P17   | 69.3 | 58.8 | 81.1  | P6    | 68.9 | 58.5 | 80.4 |
| P7    | 89.3  | 76.9 | 103.7 | P2    | 57.8 | 48.7 | 68.7 | P17   | 85.9  | 74.6 | 100.5 | P6    | 69.7 | 58.7 | 82.4  | P15   | 69.2 | 58.9 | 80.8 |
| P17   | 96.0  | 82.9 | 110.1 | P12   | 58.8 | 48.2 | 70.5 | P19   | 93.0  | 79.9 | 108.6 | P169  | 70.5 | 59.9 | 82.5  | P10   | 70.8 | 60.0 | 82.2 |
| P20   | 99.0  | 86.5 | 113.5 | P19   | 59.6 | 49.3 | 70.9 | P6    | 95.0  | 80.5 | 111.4 | P145  | 72.3 | 61.6 | 84.9  | P66   | 73.9 | 63.0 | 86.8 |
| P2    | 109.2 | 95.9 | 126.0 | EPI   | 61.7 | 46.9 | 78.7 | P20   | 99.5  | 85.8 | 114.6 | P20   | 75.5 | 64.9 | 87.3  | P3    | 77.4 | 67.3 | 89.2 |
| EPI   | 110.7 | 89.8 | 138.5 | P17   | 61.9 | 52.0 | 73.2 | EPI   | 101.7 | 80.5 | 125.9 | EPI   | 84.6 | 68.3 | 105.2 | P20   | 80.5 | 68.8 | 93.5 |

**Table S11-B**

| chr 1 |      |      |      | chr 2 |      |      |      | chr 3 |      |      |      | chr 4 |      |      |      | chr 5 |      |      |      |
|-------|------|------|------|-------|------|------|------|-------|------|------|------|-------|------|------|------|-------|------|------|------|
| cross | FC   | low  | up   |
| EPI   | 0.40 | 0.19 | 0.64 | EPI   | 0.15 | 0.03 | 0.31 | EPI   | 0.40 | 0.18 | 0.63 | P7    | 0.07 | 0.00 | 0.17 | EPI   | 0.50 | 0.27 | 0.77 |
| P6    | 0.46 | 0.29 | 0.67 | P3    | 0.27 | 0.13 | 0.44 | P7    | 0.40 | 0.25 | 0.59 | P10   | 0.24 | 0.1  | 0.41 | P20   | 0.50 | 0.34 | 0.67 |
| P35   | 0.52 | 0.29 | 0.77 | P7    | 0.43 | 0.28 | 0.61 | P6    | 0.42 | 0.26 | 0.59 | P20   | 0.40 | 0.22 | 0.61 | P8    | 0.59 | 0.35 | 0.83 |
| P7    | 0.59 | 0.38 | 0.81 | P129  | 0.46 | 0.29 | 0.65 | P145  | 0.54 | 0.35 | 0.75 | P2    | 0.48 | 0.28 | 0.70 | P3    | 0.68 | 0.49 | 0.88 |
| P169  | 0.65 | 0.43 | 0.91 | P20   | 0.49 | 0.31 | 0.69 | P8    | 0.58 | 0.39 | 0.78 | P15   | 0.53 | 0.31 | 0.79 | P2    | 0.75 | 0.52 | 0.97 |
| P15   | 0.67 | 0.45 | 0.93 | P2    | 0.55 | 0.37 | 0.75 | P19   | 0.59 | 0.40 | 0.77 | P3    | 0.61 | 0.36 | 0.88 | P9    | 0.77 | 0.56 | 1.00 |
| P12   | 0.70 | 0.45 | 0.99 | P8    | 0.55 | 0.35 | 0.77 | P20   | 0.59 | 0.42 | 0.78 | P8    | 0.68 | 0.44 | 0.96 | P15   | 0.77 | 0.57 | 1.00 |
| P145  | 0.72 | 0.49 | 0.96 | P6    | 0.60 | 0.38 | 0.82 | P2    | 0.63 | 0.44 | 0.86 | P129  | 0.68 | 0.42 | 0.95 | P169  | 0.78 | 0.53 | 1.03 |
| P3    | 0.73 | 0.49 | 1.02 | P145  | 0.66 | 0.46 | 0.86 | P15   | 0.65 | 0.46 | 0.88 | P169  | 0.72 | 0.45 | 1.01 | P145  | 0.83 | 0.61 | 1.07 |
| P20   | 0.79 | 0.57 | 1.02 | P15   | 0.66 | 0.45 | 0.87 | P129  | 0.66 | 0.46 | 0.88 | P19   | 0.76 | 0.53 | 1.03 | P12   | 0.83 | 0.60 | 1.09 |
| P8    | 0.81 | 0.58 | 1.06 | P19   | 0.67 | 0.49 | 0.87 | P3    | 0.69 | 0.50 | 0.90 | P145  | 0.77 | 0.53 | 1.04 | P66   | 0.86 | 0.66 | 1.07 |
| P17   | 0.84 | 0.60 | 1.12 | P10   | 0.69 | 0.46 | 0.92 | P66   | 0.69 | 0.49 | 0.93 | P35   | 0.81 | 0.52 | 1.12 | P7    | 0.91 | 0.66 | 1.15 |
| P2    | 0.86 | 0.62 | 1.09 | P169  | 0.73 | 0.51 | 0.95 | P169  | 0.80 | 0.59 | 1.00 | P6    | 0.85 | 0.58 | 1.15 | P129  | 0.92 | 0.67 | 1.19 |
| P129  | 0.98 | 0.71 | 1.28 | P35   | 0.74 | 0.52 | 0.98 | P35   | 0.80 | 0.55 | 1.07 | P9    | 0.89 | 0.61 | 1.20 | P17   | 0.95 | 0.71 | 1.17 |
| P19   | 0.98 | 0.76 | 1.25 | P9    | 0.84 | 0.62 | 1.07 | P9    | 0.83 | 0.61 | 1.09 | P12   | 0.89 | 0.60 | 1.20 | P35   | 0.99 | 0.75 | 1.26 |
| P9    | 0.98 | 0.70 | 1.27 | P66   | 0.87 | 0.65 | 1.11 | P12   | 0.86 | 0.64 | 1.09 | EPI   | 1.03 | 0.66 | 1.42 | P19   | 1.04 | 0.80 | 1.29 |
| P66   | 1.02 | 0.79 | 1.28 | P17   | 1.00 | 0.80 | 1.21 | P17   | 0.99 | 0.77 | 1.23 | P66   | 1.03 | 0.72 | 1.39 | P6    | 1.15 | 0.91 | 1.39 |
| P10   | 1.03 | 0.77 | 1.29 | P12   | 1.06 | 0.83 | 1.29 | P10   | 1.11 | 0.90 | 1.34 | P17   | 1.07 | 0.78 | 1.38 | P10   | 1.15 | 0.91 | 1.43 |

**Table S11-C**

| chr 1 |      |      |      | chr 2 |      |      |      | chr 3 |      |      |      | chr 4 |      |      |      | chr 5 |      |      |      |
|-------|------|------|------|-------|------|------|------|-------|------|------|------|-------|------|------|------|-------|------|------|------|
| cross | FC   | low  | up   |
| EPI   | 0.55 | 0.29 | 0.86 | EPI   | 0.76 | 0.39 | 1.16 | P6    | 0.93 | 0.74 | 1.13 | EPI   | 1.19 | 0.83 | 1.57 | EPI   | 0.87 | 0.56 | 1.23 |
| P6    | 0.89 | 0.64 | 1.16 | P3    | 0.84 | 0.51 | 1.19 | EPI   | 1.04 | 0.71 | 1.39 | P6    | 1.23 | 0.93 | 1.53 | P17   | 1.22 | 0.97 | 1.44 |
| P35   | 1.01 | 0.71 | 1.35 | P10   | 1.04 | 0.75 | 1.33 | P20   | 1.21 | 0.99 | 1.46 | P17   | 1.29 | 0.99 | 1.62 | P15   | 1.27 | 1.01 | 1.55 |
| P20   | 1.10 | 0.85 | 1.35 | P66   | 1.04 | 0.71 | 1.35 | P7    | 1.26 | 0.99 | 1.51 | P66   | 1.30 | 1.01 | 1.59 | P66   | 1.35 | 1.10 | 1.59 |
| P169  | 1.15 | 0.85 | 1.50 | P17   | 1.34 | 1.01 | 1.71 | P9    | 1.26 | 1.04 | 1.52 | P3    | 1.37 | 1.04 | 1.72 | P7    | 1.37 | 1.09 | 1.65 |
| P8    | 1.19 | 0.90 | 1.50 | P20   | 1.36 | 1.03 | 1.69 | P19   | 1.29 | 1.07 | 1.55 | P169  | 1.43 | 1.17 | 1.72 | P2    | 1.38 | 1.12 | 1.63 |
| P3    | 1.21 | 0.86 | 1.55 | P129  | 1.41 | 1.08 | 1.76 | P169  | 1.29 | 1.02 | 1.57 | P12   | 1.47 | 1.13 | 1.83 | P20   | 1.38 | 1.16 | 1.64 |
| P129  | 1.25 | 0.96 | 1.58 | P15   | 1.44 | 1.11 | 1.82 | P129  | 1.30 | 1.07 | 1.55 | P8    | 1.48 | 1.18 | 1.80 | P129  | 1.50 | 1.18 | 1.83 |
| P15   | 1.27 | 0.96 | 1.61 | P8    | 1.47 | 1.17 | 1.78 | P3    | 1.32 | 1.06 | 1.56 | P20   | 1.52 | 1.26 | 1.80 | P169  | 1.54 | 1.22 | 1.82 |
| P7    | 1.27 | 0.94 | 1.62 | P2    | 1.67 | 1.37 | 2.00 | P17   | 1.37 | 1.12 | 1.61 | P129  | 1.60 | 1.31 | 1.88 | P6    | 1.54 | 1.26 | 1.83 |
| P145  | 1.31 | 1.00 | 1.64 | P6    | 1.67 | 1.36 | 2.00 | P15   | 1.38 | 1.11 | 1.65 | P35   | 1.64 | 1.26 | 2.03 | P8    | 1.56 | 1.23 | 1.90 |
| P2    | 1.34 | 1.02 | 1.67 | P12   | 1.67 | 1.32 | 2.04 | P12   | 1.38 | 1.14 | 1.63 | P145  | 1.69 | 1.41 | 1.98 | P145  | 1.60 | 1.30 | 1.93 |
| P17   | 1.38 | 1.06 | 1.71 | P145  | 1.70 | 1.34 | 2.07 | P2    | 1.48 | 1.18 | 1.77 | P19   | 1.71 | 1.32 | 2.13 | P35   | 1.60 | 1.31 | 1.91 |
| P12   | 1.41 | 1.07 | 1.76 | P35   | 1.71 | 1.40 | 1.99 | P8    | 1.51 | 1.22 | 1.80 | P2    | 1.73 | 1.35 | 2.10 | P9    | 1.64 | 1.37 | 1.92 |
| P9    | 1.44 | 1.14 | 1.77 | P19   | 1.78 | 1.43 | 2.10 | P66   | 1.55 | 1.27 | 1.83 | P9    | 1.79 | 1.42 | 2.17 | P3    | 1.67 | 1.42 | 1.93 |
| P66   | 1.46 | 1.17 | 1.77 | P7    | 1.83 | 1.51 | 2.15 | P145  | 1.76 | 1.50 | 2.03 | P15   | 1.80 | 1.49 | 2.11 | P10   | 1.69 | 1.41 | 1.97 |
| P10   | 1.47 | 1.15 | 1.81 | P169  | 1.85 | 1.51 | 2.20 | P35   | 1.78 | 1.51 | 2.06 | P7    | 1.92 | 1.63 | 2.22 | P19   | 1.72 | 1.46 | 1.97 |
| P19   | 1.55 | 1.23 | 1.93 | P9    | 1.92 | 1.58 | 2.26 | P10   | 1.85 | 1.58 | 2.12 | P10   | 2.01 | 1.65 | 2.33 | P12   | 1.73 | 1.42 | 2.02 |

**Table S11-D**

| chr 1 |      |      |      | chr 2 |      |      |      | chr 3 |      |      |      | chr 4 |      |      |      | chr 5 |      |      |      |
|-------|------|------|------|-------|------|------|------|-------|------|------|------|-------|------|------|------|-------|------|------|------|
| cross | FC   | low  | up   |
| P15   | 0.94 | 0.81 | 1.09 | P35   | 0.85 | 0.68 | 1.02 | P10   | 0.78 | 0.66 | 0.90 | P17   | 1.02 | 0.92 | 1.11 | P19   | 0.76 | 0.62 | 0.90 |
| P2    | 0.97 | 0.85 | 1.10 | P9    | 0.86 | 0.66 | 1.04 | P35   | 0.89 | 0.77 | 1.01 | EPI   | 1.05 | 0.91 | 1.18 | P10   | 0.76 | 0.63 | 0.90 |
| P17   | 0.98 | 0.85 | 1.11 | P12   | 0.90 | 0.74 | 1.07 | P145  | 0.95 | 0.84 | 1.06 | P8    | 1.06 | 0.95 | 1.15 | P9    | 0.80 | 0.67 | 0.94 |
| P19   | 0.99 | 0.85 | 1.12 | P19   | 0.91 | 0.73 | 1.09 | P17   | 0.96 | 0.84 | 1.07 | P145  | 1.06 | 0.96 | 1.15 | P145  | 0.81 | 0.68 | 0.95 |
| P9    | 0.99 | 0.84 | 1.14 | P169  | 0.95 | 0.77 | 1.13 | P129  | 0.99 | 0.87 | 1.11 | P66   | 1.06 | 0.97 | 1.14 | P35   | 0.93 | 0.78 | 1.07 |
| P12   | 1.01 | 0.86 | 1.15 | P17   | 0.99 | 0.84 | 1.14 | P2    | 1.00 | 0.89 | 1.12 | P2    | 1.07 | 0.97 | 1.17 | P12   | 0.95 | 0.81 | 1.09 |
| P129  | 1.02 | 0.86 | 1.15 | P7    | 1.00 | 0.83 | 1.17 | P8    | 1.00 | 0.89 | 1.12 | P9    | 1.08 | 0.97 | 1.16 | P169  | 0.97 | 0.83 | 1.11 |
| P145  | 1.02 | 0.89 | 1.16 | P6    | 1.04 | 0.87 | 1.22 | P9    | 1.02 | 0.89 | 1.13 | P12   | 1.08 | 0.98 | 1.18 | P6    | 1.00 | 0.86 | 1.13 |
| P10   | 1.04 | 0.91 | 1.17 | P15   | 1.08 | 0.91 | 1.27 | P66   | 1.04 | 0.94 | 1.14 | P35   | 1.11 | 1.00 | 1.21 | P7    | 1.01 | 0.86 | 1.16 |
| P8    | 1.06 | 0.92 | 1.20 | P2    | 1.09 | 0.91 | 1.24 | P3    | 1.06 | 0.95 | 1.17 | P15   | 1.11 | 1.02 | 1.20 | P66   | 1.02 | 0.88 | 1.15 |
| P66   | 1.06 | 0.93 | 1.19 | P8    | 1.10 | 0.94 | 1.26 | P12   | 1.06 | 0.95 | 1.16 | P169  | 1.11 | 1.03 | 1.19 | P129  | 1.02 | 0.87 | 1.17 |
| P7    | 1.07 | 0.94 | 1.22 | P145  | 1.13 | 0.98 | 1.30 | P15   | 1.08 | 0.98 | 1.18 | P19   | 1.11 | 1.00 | 1.21 | P8    | 1.04 | 0.88 | 1.20 |
| P169  | 1.09 | 0.94 | 1.22 | P66   | 1.14 | 0.97 | 1.31 | P169  | 1.10 | 0.98 | 1.21 | P6    | 1.13 | 1.04 | 1.20 | P2    | 1.05 | 0.93 | 1.18 |
| P3    | 1.13 | 0.99 | 1.26 | P129  | 1.15 | 0.97 | 1.33 | P19   | 1.12 | 1.01 | 1.21 | P3    | 1.13 | 1.04 | 1.21 | P15   | 1.10 | 0.97 | 1.22 |
| P35   | 1.15 | 1.01 | 1.28 | P10   | 1.33 | 1.16 | 1.49 | P20   | 1.14 | 1.03 | 1.24 | P129  | 1.17 | 1.08 | 1.27 | P20   | 1.11 | 0.99 | 1.23 |
| P20   | 1.15 | 1.04 | 1.27 | P20   | 1.34 | 1.17 | 1.49 | EPI   | 1.18 | 1.04 | 1.31 | P20   | 1.20 | 1.13 | 1.27 | P17   | 1.12 | 0.99 | 1.25 |
| P6    | 1.16 | 1.02 | 1.29 | P3    | 1.54 | 1.38 | 1.69 | P6    | 1.20 | 1.10 | 1.29 | P10   | 1.25 | 1.17 | 1.32 | P3    | 1.12 | 0.99 | 1.24 |
| EPI   | 1.23 | 1.05 | 1.41 | EPI   | 1.60 | 1.42 | 1.77 | P7    | 1.21 | 1.11 | 1.30 | P7    | 1.28 | 1.19 | 1.36 | EPI   | 1.30 | 1.14 | 1.45 |
